# Supplementary material for: Identification of the genes at S and Z reveals the molecular basis and evolution of grass self-incompatibility
Source: Front Plant Sci. 2022 Oct 18;13:1011299. doi: 10.3389/fpls.2022.1011299 (PMC9623065; doi:10.3389/fpls.2022.1011299)
Supplement: Supplementary file 3 [file DataSheet_1.xlsx]

## Sheet: Sheet1
Supplementary dataset S1: Interpro-predicted domains of genes present at S and Z loci.
Accession	MD5 digest	Len	Analysis	Signature Accession	Signature Description	Start Location	Stop location	Score (eval)	Status (T=true)	Date	Interpro annotations (accession)	Interpro annotations (description)
KYUSt_chr2.53334	86c52eea7fdcdfb107d710d62e2d5456	479	SUPERFAMILY	SSF53067	Actin-like ATPase domain	2	223	1.42e-57	T	30-05-2022	IPR043129	ATPase, nucleotide binding domain
KYUSt_chr2.53334	86c52eea7fdcdfb107d710d62e2d5456	479	PIRSF	PIRSF000538	GlpK	1	478	5.3e-124	T	30-05-2022	IPR000577	Carbohydrate kinase, FGGY
KYUSt_chr2.53334	86c52eea7fdcdfb107d710d62e2d5456	479	Gene3D	G3DSA:3.30.420.40	-	222	474	4.1e-89	T	30-05-2022	-	-
KYUSt_chr2.53334	86c52eea7fdcdfb107d710d62e2d5456	479	SUPERFAMILY	SSF53067	Actin-like ATPase domain	223	472	8.81e-72	T	30-05-2022	IPR043129	ATPase, nucleotide binding domain
KYUSt_chr2.53334	86c52eea7fdcdfb107d710d62e2d5456	479	TIGRFAM	TIGR01311	glycerol_kin: glycerol kinase	1	472	2.5e-186	T	30-05-2022	IPR005999	Glycerol kinase
KYUSt_chr2.53334	86c52eea7fdcdfb107d710d62e2d5456	479	Pfam	PF02782	FGGY family of carbohydrate kinases, C-terminal domain	228	428	1.2e-52	T	30-05-2022	IPR018485	Carbohydrate kinase, FGGY, C-terminal
KYUSt_chr2.53334	86c52eea7fdcdfb107d710d62e2d5456	479	Gene3D	G3DSA:3.30.420.40	-	1	221	5e-65	T	30-05-2022	-	-
KYUSt_chr2.53334	86c52eea7fdcdfb107d710d62e2d5456	479	ProSitePatterns	PS00933	FGGY family of carbohydrate kinases signature 1.	92	104	-	T	30-05-2022	IPR018483	Carbohydrate kinase, FGGY, conserved site
KYUSt_chr2.53334	86c52eea7fdcdfb107d710d62e2d5456	479	PANTHER	PTHR10196:SF91	-	1	475	3.5e-250	T	30-05-2022	-	-
KYUSt_chr2.53334	86c52eea7fdcdfb107d710d62e2d5456	479	Pfam	PF00370	FGGY family of carbohydrate kinases, N-terminal domain	1	220	9e-50	T	30-05-2022	IPR018484	Carbohydrate kinase, FGGY, N-terminal
KYUSt_chr2.53334	86c52eea7fdcdfb107d710d62e2d5456	479	PANTHER	PTHR10196	SUGAR KINASE	1	475	3.5e-250	T	30-05-2022	-	-
KYUSt_chr2.53349	5733ddf858fdce31f52e4d1596b62f16	555	SUPERFAMILY	SSF57850	RING/U-box	8	114	3.3e-15	T	30-05-2022	-	-
KYUSt_chr2.53349	5733ddf858fdce31f52e4d1596b62f16	555	Gene3D	G3DSA:3.90.70.10	Cysteine proteinases	171	547	2.4e-99	T	30-05-2022	-	-
KYUSt_chr2.53349	5733ddf858fdce31f52e4d1596b62f16	555	Gene3D	G3DSA:3.30.40.10	Zinc/RING finger domain, C3HC4 (zinc finger)	5	124	8.3e-19	T	30-05-2022	IPR013083	Zinc finger, RING/FYVE/PHD-type
KYUSt_chr2.53349	5733ddf858fdce31f52e4d1596b62f16	555	Pfam	PF00443	Ubiquitin carboxyl-terminal hydrolase	177	539	1.8e-58	T	30-05-2022	IPR001394	Peptidase C19, ubiquitin carboxyl-terminal hydrolase
KYUSt_chr2.53349	5733ddf858fdce31f52e4d1596b62f16	555	ProSiteProfiles	PS50271	Zinc finger UBP-type profile.	48	109	12.2858	T	30-05-2022	IPR001607	Zinc finger, UBP-type
KYUSt_chr2.53349	5733ddf858fdce31f52e4d1596b62f16	555	ProSiteProfiles	PS50235	Ubiquitin specific protease (USP) domain profile.	176	542	56.2541	T	30-05-2022	IPR028889	Ubiquitin specific protease domain
KYUSt_chr2.53349	5733ddf858fdce31f52e4d1596b62f16	555	PANTHER	PTHR21646:SF66	UBIQUITINYL HYDROLASE 1	171	551	1.7e-225	T	30-05-2022	-	-
KYUSt_chr2.53349	5733ddf858fdce31f52e4d1596b62f16	555	PANTHER	PTHR21646:SF66	UBIQUITINYL HYDROLASE 1	6	166	1.7e-225	T	30-05-2022	-	-
KYUSt_chr2.53349	5733ddf858fdce31f52e4d1596b62f16	555	ProSitePatterns	PS00972	Ubiquitin specific protease (USP) domain signature 1.	177	192	-	T	30-05-2022	IPR018200	Ubiquitin specific protease, conserved site
KYUSt_chr2.53349	5733ddf858fdce31f52e4d1596b62f16	555	Pfam	PF02148	Zn-finger in ubiquitin-hydrolases and other protein	50	111	3e-12	T	30-05-2022	IPR001607	Zinc finger, UBP-type
KYUSt_chr2.53349	5733ddf858fdce31f52e4d1596b62f16	555	SUPERFAMILY	SSF54001	Cysteine proteinases	174	541	3.14e-89	T	30-05-2022	IPR038765	Papain-like cysteine peptidase superfamily
KYUSt_chr2.53349	5733ddf858fdce31f52e4d1596b62f16	555	PANTHER	PTHR21646	UBIQUITIN CARBOXYL-TERMINAL HYDROLASE	171	551	1.7e-225	T	30-05-2022	-	-
KYUSt_chr2.53349	5733ddf858fdce31f52e4d1596b62f16	555	PANTHER	PTHR21646	UBIQUITIN CARBOXYL-TERMINAL HYDROLASE	6	166	1.7e-225	T	30-05-2022	-	-
KYUSt_chr2.53351	789fcf1177f55895fefdb79c60bc095c	221	PANTHER	PTHR14614:SF123	OSJNBA0070O11.4 PROTEIN	5	216	8.5e-80	T	30-05-2022	-	-
KYUSt_chr2.53351	789fcf1177f55895fefdb79c60bc095c	221	PANTHER	PTHR14614	HEPATOCELLULAR CARCINOMA-ASSOCIATED ANTIGEN	5	216	8.5e-80	T	30-05-2022	IPR019410	Lysine methyltransferase
KYUSt_chr2.53351	789fcf1177f55895fefdb79c60bc095c	221	Pfam	PF10294	Lysine methyltransferase	32	171	1e-22	T	30-05-2022	IPR019410	Lysine methyltransferase
KYUSt_chr2.53351	789fcf1177f55895fefdb79c60bc095c	221	Gene3D	G3DSA:3.40.50.150	Vaccinia Virus protein VP39	16	208	6.9e-41	T	30-05-2022	-	-
KYUSt_chr2.53351	789fcf1177f55895fefdb79c60bc095c	221	CDD	cd02440	AdoMet_MTases	59	161	4.21885e-05	T	30-05-2022	-	-
KYUSt_chr2.53351	789fcf1177f55895fefdb79c60bc095c	221	SUPERFAMILY	SSF53335	S-adenosyl-L-methionine-dependent methyltransferases	43	199	1.18e-16	T	30-05-2022	IPR029063	S-adenosyl-L-methionine-dependent methyltransferase
KYUSt_chr2.53293	cdee1e7cfe5aaf4b5cdc266b49b097cd	432	MobiDBLite	mobidb-lite	consensus disorder prediction	199	266	-	T	30-05-2022	-	-
KYUSt_chr2.53293	cdee1e7cfe5aaf4b5cdc266b49b097cd	432	Gene3D	G3DSA:1.10.150.670	-	333	429	1.8e-21	T	30-05-2022	IPR042530	EME1/EME2, C-terminal domain
KYUSt_chr2.53293	cdee1e7cfe5aaf4b5cdc266b49b097cd	432	PANTHER	PTHR21077	EME1 PROTEIN	63	293	1.8e-141	T	30-05-2022	IPR033310	Mms4/EME1/EME2
KYUSt_chr2.53293	cdee1e7cfe5aaf4b5cdc266b49b097cd	432	Coils	Coil	Coil	216	264	-	T	30-05-2022	-	-
KYUSt_chr2.53293	cdee1e7cfe5aaf4b5cdc266b49b097cd	432	PANTHER	PTHR21077:SF8	-	312	432	1.8e-141	T	30-05-2022	-	-
KYUSt_chr2.53293	cdee1e7cfe5aaf4b5cdc266b49b097cd	432	PANTHER	PTHR21077	EME1 PROTEIN	312	432	1.8e-141	T	30-05-2022	IPR033310	Mms4/EME1/EME2
KYUSt_chr2.53293	cdee1e7cfe5aaf4b5cdc266b49b097cd	432	PANTHER	PTHR21077	EME1 PROTEIN	1	64	1.8e-141	T	30-05-2022	IPR033310	Mms4/EME1/EME2
KYUSt_chr2.53293	cdee1e7cfe5aaf4b5cdc266b49b097cd	432	MobiDBLite	mobidb-lite	consensus disorder prediction	137	159	-	T	30-05-2022	-	-
KYUSt_chr2.53293	cdee1e7cfe5aaf4b5cdc266b49b097cd	432	MobiDBLite	mobidb-lite	consensus disorder prediction	1	266	-	T	30-05-2022	-	-
KYUSt_chr2.53293	cdee1e7cfe5aaf4b5cdc266b49b097cd	432	PANTHER	PTHR21077:SF8	-	63	293	1.8e-141	T	30-05-2022	-	-
KYUSt_chr2.53293	cdee1e7cfe5aaf4b5cdc266b49b097cd	432	PANTHER	PTHR21077:SF8	-	1	64	1.8e-141	T	30-05-2022	-	-
KYUSt_chr2.53289	e32a9a0ef5b48c5b67b1705e67e93744	871	Coils	Coil	Coil	868	871	-	T	30-05-2022	-	-
KYUSt_chr2.53289	e32a9a0ef5b48c5b67b1705e67e93744	871	Pfam	PF05911	Filament-like plant protein, long coiled-coil	475	697	2.8e-21	T	30-05-2022	IPR008587	Filament-like plant protein
KYUSt_chr2.53289	e32a9a0ef5b48c5b67b1705e67e93744	871	Pfam	PF05911	Filament-like plant protein, long coiled-coil	665	743	2.4e-15	T	30-05-2022	IPR008587	Filament-like plant protein
KYUSt_chr2.53289	e32a9a0ef5b48c5b67b1705e67e93744	871	Pfam	PF05911	Filament-like plant protein, long coiled-coil	73	458	7.4e-138	T	30-05-2022	IPR008587	Filament-like plant protein
KYUSt_chr2.53289	e32a9a0ef5b48c5b67b1705e67e93744	871	Coils	Coil	Coil	6	26	-	T	30-05-2022	-	-
KYUSt_chr2.53289	e32a9a0ef5b48c5b67b1705e67e93744	871	Coils	Coil	Coil	344	364	-	T	30-05-2022	-	-
KYUSt_chr2.53289	e32a9a0ef5b48c5b67b1705e67e93744	871	MobiDBLite	mobidb-lite	consensus disorder prediction	738	759	-	T	30-05-2022	-	-
KYUSt_chr2.53289	e32a9a0ef5b48c5b67b1705e67e93744	871	PANTHER	PTHR31580	FILAMENT-LIKE PLANT PROTEIN 4	707	863	4.3e-230	T	30-05-2022	-	-
KYUSt_chr2.53289	e32a9a0ef5b48c5b67b1705e67e93744	871	MobiDBLite	mobidb-lite	consensus disorder prediction	791	817	-	T	30-05-2022	-	-
KYUSt_chr2.53289	e32a9a0ef5b48c5b67b1705e67e93744	871	PANTHER	PTHR31580:SF22	FILAMENT-LIKE PLANT PROTEIN 7	72	711	4.3e-230	T	30-05-2022	-	-
KYUSt_chr2.53289	e32a9a0ef5b48c5b67b1705e67e93744	871	PANTHER	PTHR31580:SF22	FILAMENT-LIKE PLANT PROTEIN 7	707	863	4.3e-230	T	30-05-2022	-	-
KYUSt_chr2.53289	e32a9a0ef5b48c5b67b1705e67e93744	871	PANTHER	PTHR31580:SF22	FILAMENT-LIKE PLANT PROTEIN 7	5	47	4.3e-230	T	30-05-2022	-	-
KYUSt_chr2.53289	e32a9a0ef5b48c5b67b1705e67e93744	871	Coils	Coil	Coil	129	163	-	T	30-05-2022	-	-
KYUSt_chr2.53289	e32a9a0ef5b48c5b67b1705e67e93744	871	PANTHER	PTHR31580	FILAMENT-LIKE PLANT PROTEIN 4	72	711	4.3e-230	T	30-05-2022	-	-
KYUSt_chr2.53289	e32a9a0ef5b48c5b67b1705e67e93744	871	PANTHER	PTHR31580	FILAMENT-LIKE PLANT PROTEIN 4	5	47	4.3e-230	T	30-05-2022	-	-
KYUSt_chr2.53356	2a3bdc2aa88992ffee3654845b95ecf5	338	MobiDBLite	mobidb-lite	consensus disorder prediction	234	272	-	T	30-05-2022	-	-
KYUSt_chr2.53422	99b61d85ea4578f8828c65fa3e03255c	832	PRINTS	PR00762	Chloride channel signature	220	239	7.2e-59	T	30-05-2022	IPR001807	Chloride channel, voltage gated
KYUSt_chr2.53422	99b61d85ea4578f8828c65fa3e03255c	832	PRINTS	PR00762	Chloride channel signature	189	206	7.2e-59	T	30-05-2022	IPR001807	Chloride channel, voltage gated
KYUSt_chr2.53422	99b61d85ea4578f8828c65fa3e03255c	832	PRINTS	PR00762	Chloride channel signature	509	529	7.2e-59	T	30-05-2022	IPR001807	Chloride channel, voltage gated
KYUSt_chr2.53422	99b61d85ea4578f8828c65fa3e03255c	832	PRINTS	PR00762	Chloride channel signature	284	303	7.2e-59	T	30-05-2022	IPR001807	Chloride channel, voltage gated
KYUSt_chr2.53422	99b61d85ea4578f8828c65fa3e03255c	832	PRINTS	PR00762	Chloride channel signature	541	557	7.2e-59	T	30-05-2022	IPR001807	Chloride channel, voltage gated
KYUSt_chr2.53422	99b61d85ea4578f8828c65fa3e03255c	832	PRINTS	PR00762	Chloride channel signature	559	578	7.2e-59	T	30-05-2022	IPR001807	Chloride channel, voltage gated
KYUSt_chr2.53422	99b61d85ea4578f8828c65fa3e03255c	832	PRINTS	PR00762	Chloride channel signature	597	611	7.2e-59	T	30-05-2022	IPR001807	Chloride channel, voltage gated
KYUSt_chr2.53422	99b61d85ea4578f8828c65fa3e03255c	832	PANTHER	PTHR11689	CHLORIDE CHANNEL PROTEIN CLC FAMILY MEMBER	52	814	0	T	30-05-2022	-	-
KYUSt_chr2.53422	99b61d85ea4578f8828c65fa3e03255c	832	Pfam	PF00654	Voltage gated chloride channel	178	591	8.6e-84	T	30-05-2022	IPR001807	Chloride channel, voltage gated
KYUSt_chr2.53422	99b61d85ea4578f8828c65fa3e03255c	832	SUPERFAMILY	SSF54631	CBS-domain pair	613	788	1.66e-24	T	30-05-2022	-	-
KYUSt_chr2.53422	99b61d85ea4578f8828c65fa3e03255c	832	Pfam	PF00571	CBS domain	739	787	0.00039	T	30-05-2022	IPR000644	CBS domain
KYUSt_chr2.53422	99b61d85ea4578f8828c65fa3e03255c	832	Gene3D	G3DSA:3.10.580.10	-	611	790	4.2e-08	T	30-05-2022	-	-
KYUSt_chr2.53422	99b61d85ea4578f8828c65fa3e03255c	832	PRINTS	PR01120	Plant CLC chloride channel signature	319	329	4.7e-19	T	30-05-2022	IPR002251	Chloride channel ClC-plant
KYUSt_chr2.53422	99b61d85ea4578f8828c65fa3e03255c	832	PRINTS	PR01120	Plant CLC chloride channel signature	337	344	4.7e-19	T	30-05-2022	IPR002251	Chloride channel ClC-plant
KYUSt_chr2.53422	99b61d85ea4578f8828c65fa3e03255c	832	PRINTS	PR01120	Plant CLC chloride channel signature	305	313	4.7e-19	T	30-05-2022	IPR002251	Chloride channel ClC-plant
KYUSt_chr2.53422	99b61d85ea4578f8828c65fa3e03255c	832	PRINTS	PR01120	Plant CLC chloride channel signature	461	477	4.7e-19	T	30-05-2022	IPR002251	Chloride channel ClC-plant
KYUSt_chr2.53422	99b61d85ea4578f8828c65fa3e03255c	832	PRINTS	PR01120	Plant CLC chloride channel signature	94	102	4.7e-19	T	30-05-2022	IPR002251	Chloride channel ClC-plant
KYUSt_chr2.53422	99b61d85ea4578f8828c65fa3e03255c	832	CDD	cd04591	CBS_pair_voltage-gated_CLC_euk_bac	613	790	4.42642e-31	T	30-05-2022	-	-
KYUSt_chr2.53422	99b61d85ea4578f8828c65fa3e03255c	832	PANTHER	PTHR11689:SF147	CHLORIDE CHANNEL PROTEIN	52	814	0	T	30-05-2022	-	-
KYUSt_chr2.53422	99b61d85ea4578f8828c65fa3e03255c	832	MobiDBLite	mobidb-lite	consensus disorder prediction	1	30	-	T	30-05-2022	-	-
KYUSt_chr2.53422	99b61d85ea4578f8828c65fa3e03255c	832	SUPERFAMILY	SSF81340	Clc chloride channel	98	612	1.12e-94	T	30-05-2022	IPR014743	Chloride channel, core
KYUSt_chr2.53422	99b61d85ea4578f8828c65fa3e03255c	832	ProSiteProfiles	PS51371	CBS domain profile.	738	798	9.44781	T	30-05-2022	IPR000644	CBS domain
KYUSt_chr2.53422	99b61d85ea4578f8828c65fa3e03255c	832	SMART	SM00116	cbs_1	630	683	0.023	T	30-05-2022	IPR000644	CBS domain
KYUSt_chr2.53422	99b61d85ea4578f8828c65fa3e03255c	832	SMART	SM00116	cbs_1	741	792	14	T	30-05-2022	IPR000644	CBS domain
KYUSt_chr2.53422	99b61d85ea4578f8828c65fa3e03255c	832	Gene3D	G3DSA:1.10.3080.10	Clc chloride channel	112	610	5e-119	T	30-05-2022	-	-
KYUSt_chr1.6189	4284dcf1fdb3c353842d6a6acc00fbaf	460	Pfam	PF03478	Protein of unknown function (DUF295)	365	430	5.7e-11	T	30-05-2022	IPR005174	Domain unknown function DUF295
KYUSt_chr1.6189	4284dcf1fdb3c353842d6a6acc00fbaf	460	MobiDBLite	mobidb-lite	consensus disorder prediction	1	47	-	T	30-05-2022	-	-
KYUSt_chr1.6189	4284dcf1fdb3c353842d6a6acc00fbaf	460	PANTHER	PTHR45560	OS04G0163150 PROTEIN-RELATED	9	460	1.1e-182	T	30-05-2022	-	-
KYUSt_chr1.6189	4284dcf1fdb3c353842d6a6acc00fbaf	460	MobiDBLite	mobidb-lite	consensus disorder prediction	1	17	-	T	30-05-2022	-	-
KYUSt_chr1.6189	4284dcf1fdb3c353842d6a6acc00fbaf	460	PANTHER	PTHR45560:SF4	-	9	460	1.1e-182	T	30-05-2022	-	-
KYUSt_chr1.6189	4284dcf1fdb3c353842d6a6acc00fbaf	460	SUPERFAMILY	SSF50998	Quinoprotein alcohol dehydrogenase-like	124	299	8.63e-05	T	30-05-2022	IPR011047	Quinoprotein alcohol dehydrogenase-like superfamily
KYUSt_chr2.53455	37b2666f8b4b3cf3e42f905308cd2cb8	388	PRINTS	PR00412	Epoxide hydrolase signature	159	174	2.6e-10	T	30-05-2022	IPR000639	Epoxide hydrolase-like
KYUSt_chr2.53455	37b2666f8b4b3cf3e42f905308cd2cb8	388	PRINTS	PR00412	Epoxide hydrolase signature	364	386	2.6e-10	T	30-05-2022	IPR000639	Epoxide hydrolase-like
KYUSt_chr2.53455	37b2666f8b4b3cf3e42f905308cd2cb8	388	PRINTS	PR00412	Epoxide hydrolase signature	139	157	2.6e-10	T	30-05-2022	IPR000639	Epoxide hydrolase-like
KYUSt_chr2.53455	37b2666f8b4b3cf3e42f905308cd2cb8	388	PRINTS	PR00412	Epoxide hydrolase signature	223	236	2.6e-10	T	30-05-2022	IPR000639	Epoxide hydrolase-like
KYUSt_chr2.53455	37b2666f8b4b3cf3e42f905308cd2cb8	388	Gene3D	G3DSA:3.40.50.1820	alpha/beta hydrolase	100	387	4.2e-42	T	30-05-2022	IPR029058	Alpha/Beta hydrolase fold
KYUSt_chr2.53455	37b2666f8b4b3cf3e42f905308cd2cb8	388	PANTHER	PTHR43194:SF2	ALPHA/BETA-HYDROLASES SUPERFAMILY PROTEIN	110	387	3e-81	T	30-05-2022	-	-
KYUSt_chr2.53455	37b2666f8b4b3cf3e42f905308cd2cb8	388	PANTHER	PTHR43194	HYDROLASE ALPHA/BETA FOLD FAMILY	110	387	3e-81	T	30-05-2022	-	-
KYUSt_chr2.53455	37b2666f8b4b3cf3e42f905308cd2cb8	388	MobiDBLite	mobidb-lite	consensus disorder prediction	1	20	-	T	30-05-2022	-	-
KYUSt_chr2.53455	37b2666f8b4b3cf3e42f905308cd2cb8	388	PRINTS	PR00111	Alpha/beta hydrolase fold signature	159	174	1.5e-08	T	30-05-2022	IPR000073	Alpha/beta hydrolase fold-1
KYUSt_chr2.53455	37b2666f8b4b3cf3e42f905308cd2cb8	388	PRINTS	PR00111	Alpha/beta hydrolase fold signature	223	236	1.5e-08	T	30-05-2022	IPR000073	Alpha/beta hydrolase fold-1
KYUSt_chr2.53455	37b2666f8b4b3cf3e42f905308cd2cb8	388	PRINTS	PR00111	Alpha/beta hydrolase fold signature	332	346	1.5e-08	T	30-05-2022	IPR000073	Alpha/beta hydrolase fold-1
KYUSt_chr2.53455	37b2666f8b4b3cf3e42f905308cd2cb8	388	Pfam	PF12146	Serine aminopeptidase, S33	131	370	1.5e-12	T	30-05-2022	IPR022742	Serine aminopeptidase, S33
KYUSt_chr2.53455	37b2666f8b4b3cf3e42f905308cd2cb8	388	SUPERFAMILY	SSF53474	alpha/beta-Hydrolases	112	387	5.91e-42	T	30-05-2022	IPR029058	Alpha/Beta hydrolase fold
KYUSt_chr2.53455	37b2666f8b4b3cf3e42f905308cd2cb8	388	MobiDBLite	mobidb-lite	consensus disorder prediction	45	64	-	T	30-05-2022	-	-
KYUSt_chr2.53455	37b2666f8b4b3cf3e42f905308cd2cb8	388	MobiDBLite	mobidb-lite	consensus disorder prediction	1	69	-	T	30-05-2022	-	-
KYUSt_chr2.53480	5b9dc891f7f0bfc11c2da5aad20f4fe1	280	SUPERFAMILY	SSF47699	Bifunctional inhibitor/lipid-transfer protein/seed storage 2S albumin	202	279	3.16e-18	T	30-05-2022	IPR036312	Bifunctional inhibitor/plant lipid transfer protein/seed storage helical domain superfamily
KYUSt_chr2.53480	5b9dc891f7f0bfc11c2da5aad20f4fe1	280	ProSiteProfiles	PS51257	Prokaryotic membrane lipoprotein lipid attachment site profile.	1	25	5	T	30-05-2022	-	-
KYUSt_chr2.53480	5b9dc891f7f0bfc11c2da5aad20f4fe1	280	Pfam	PF14547	Hydrophobic seed protein	199	280	2.8e-19	T	30-05-2022	IPR027923	Hydrophobic seed protein domain
KYUSt_chr2.53480	5b9dc891f7f0bfc11c2da5aad20f4fe1	280	MobiDBLite	mobidb-lite	consensus disorder prediction	166	196	-	T	30-05-2022	-	-
KYUSt_chr2.53480	5b9dc891f7f0bfc11c2da5aad20f4fe1	280	CDD	cd01958	HPS_like	198	279	9.53934e-24	T	30-05-2022	IPR027923	Hydrophobic seed protein domain
KYUSt_chr2.53480	5b9dc891f7f0bfc11c2da5aad20f4fe1	280	Gene3D	G3DSA:1.10.110.10	-	199	280	3.1e-21	T	30-05-2022	IPR036312	Bifunctional inhibitor/plant lipid transfer protein/seed storage helical domain superfamily
KYUSt_chr2.53480	5b9dc891f7f0bfc11c2da5aad20f4fe1	280	MobiDBLite	mobidb-lite	consensus disorder prediction	155	198	-	T	30-05-2022	-	-
KYUSt_chr2.53480	5b9dc891f7f0bfc11c2da5aad20f4fe1	280	PANTHER	PTHR31731:SF20	36.4 KDA PROLINE-RICH PROTEIN	1	279	4.2e-82	T	30-05-2022	-	-
KYUSt_chr2.53480	5b9dc891f7f0bfc11c2da5aad20f4fe1	280	PANTHER	PTHR31731	-	1	279	4.2e-82	T	30-05-2022	-	-
KYUSt_chr2.53480	5b9dc891f7f0bfc11c2da5aad20f4fe1	280	SMART	SM00499	aai_6	200	279	0.00081	T	30-05-2022	IPR016140	Bifunctional inhibitor/plant lipid transfer protein/seed storage helical domain
KYUSt_chr2.53424	c917a529143e22c017b94b37b3a3bd65	369	Gene3D	G3DSA:1.25.40.10	Tetratricopeptide repeat domain	308	369	1e-11	T	30-05-2022	IPR011990	Tetratricopeptide-like helical domain superfamily
KYUSt_chr2.53424	c917a529143e22c017b94b37b3a3bd65	369	Gene3D	G3DSA:1.25.40.10	Tetratricopeptide repeat domain	35	273	8.6e-78	T	30-05-2022	IPR011990	Tetratricopeptide-like helical domain superfamily
KYUSt_chr2.53424	c917a529143e22c017b94b37b3a3bd65	369	PANTHER	PTHR10805:SF2	COATOMER SUBUNIT EPSILON-2	312	369	4.1e-157	T	30-05-2022	-	-
KYUSt_chr2.53424	c917a529143e22c017b94b37b3a3bd65	369	PANTHER	PTHR10805:SF2	COATOMER SUBUNIT EPSILON-2	31	267	4.1e-157	T	30-05-2022	-	-
KYUSt_chr2.53424	c917a529143e22c017b94b37b3a3bd65	369	Pfam	PF04733	Coatomer epsilon subunit	312	368	1e-13	T	30-05-2022	-	-
KYUSt_chr2.53424	c917a529143e22c017b94b37b3a3bd65	369	Pfam	PF04733	Coatomer epsilon subunit	34	267	1.7e-90	T	30-05-2022	-	-
KYUSt_chr2.53424	c917a529143e22c017b94b37b3a3bd65	369	MobiDBLite	mobidb-lite	consensus disorder prediction	1	32	-	T	30-05-2022	-	-
KYUSt_chr2.53424	c917a529143e22c017b94b37b3a3bd65	369	SUPERFAMILY	SSF48452	TPR-like	143	266	6.45e-10	T	30-05-2022	IPR011990	Tetratricopeptide-like helical domain superfamily
KYUSt_chr2.53424	c917a529143e22c017b94b37b3a3bd65	369	PANTHER	PTHR10805	COATOMER SUBUNIT EPSILON	312	369	4.1e-157	T	30-05-2022	IPR006822	Coatomer, epsilon subunit
KYUSt_chr2.53424	c917a529143e22c017b94b37b3a3bd65	369	PANTHER	PTHR10805	COATOMER SUBUNIT EPSILON	31	267	4.1e-157	T	30-05-2022	IPR006822	Coatomer, epsilon subunit
KYUSt_chr2.53323	aa070e31400c5490b4f58dc49eccd5f9	203	Gene3D	G3DSA:1.20.5.170	-	125	176	4.9e-14	T	30-05-2022	-	-
KYUSt_chr2.53323	aa070e31400c5490b4f58dc49eccd5f9	203	PANTHER	PTHR22952:SF383	-	1	173	6.2e-39	T	30-05-2022	-	-
KYUSt_chr2.53323	aa070e31400c5490b4f58dc49eccd5f9	203	MobiDBLite	mobidb-lite	consensus disorder prediction	69	89	-	T	30-05-2022	-	-
KYUSt_chr2.53323	aa070e31400c5490b4f58dc49eccd5f9	203	Coils	Coil	Coil	142	169	-	T	30-05-2022	-	-
KYUSt_chr2.53323	aa070e31400c5490b4f58dc49eccd5f9	203	MobiDBLite	mobidb-lite	consensus disorder prediction	120	142	-	T	30-05-2022	-	-
KYUSt_chr2.53323	aa070e31400c5490b4f58dc49eccd5f9	203	MobiDBLite	mobidb-lite	consensus disorder prediction	126	142	-	T	30-05-2022	-	-
KYUSt_chr2.53323	aa070e31400c5490b4f58dc49eccd5f9	203	CDD	cd14707	bZIP_plant_BZIP46	126	176	3.27711e-24	T	30-05-2022	-	-
KYUSt_chr2.53323	aa070e31400c5490b4f58dc49eccd5f9	203	ProSitePatterns	PS00036	Basic-leucine zipper (bZIP) domain signature.	129	144	-	T	30-05-2022	IPR004827	Basic-leucine zipper domain
KYUSt_chr2.53323	aa070e31400c5490b4f58dc49eccd5f9	203	SUPERFAMILY	SSF57959	Leucine zipper domain	126	172	1.06e-10	T	30-05-2022	-	-
KYUSt_chr2.53323	aa070e31400c5490b4f58dc49eccd5f9	203	SMART	SM00338	brlzneu	122	175	4e-07	T	30-05-2022	IPR004827	Basic-leucine zipper domain
KYUSt_chr2.53323	aa070e31400c5490b4f58dc49eccd5f9	203	Pfam	PF00170	bZIP transcription factor	126	173	2.9e-13	T	30-05-2022	IPR004827	Basic-leucine zipper domain
KYUSt_chr2.53323	aa070e31400c5490b4f58dc49eccd5f9	203	MobiDBLite	mobidb-lite	consensus disorder prediction	68	89	-	T	30-05-2022	-	-
KYUSt_chr2.53323	aa070e31400c5490b4f58dc49eccd5f9	203	MobiDBLite	mobidb-lite	consensus disorder prediction	178	203	-	T	30-05-2022	-	-
KYUSt_chr2.53323	aa070e31400c5490b4f58dc49eccd5f9	203	ProSiteProfiles	PS50217	Basic-leucine zipper (bZIP) domain profile.	124	173	10.5073	T	30-05-2022	IPR004827	Basic-leucine zipper domain
KYUSt_chr2.53323	aa070e31400c5490b4f58dc49eccd5f9	203	PANTHER	PTHR22952	CAMP-RESPONSE ELEMENT BINDING PROTEIN-RELATED	1	173	6.2e-39	T	30-05-2022	IPR043452	Plant bZIP transcription factors
SDUF_3	a1c7b78aa62c358f0102d7f919bc5cfd	550	PANTHER	PTHR31549	PROTEIN, PUTATIVE (DUF247)-RELATED-RELATED	2	547	4.5e-237	T	30-05-2022	IPR004158	Protein of unknown function DUF247, plant
SDUF_3	a1c7b78aa62c358f0102d7f919bc5cfd	550	PANTHER	PTHR31549:SF189	OS05G0197900 PROTEIN	2	547	4.5e-237	T	30-05-2022	-	-
SDUF_3	a1c7b78aa62c358f0102d7f919bc5cfd	550	Pfam	PF03140	Plant protein of unknown function	43	535	1.3e-111	T	30-05-2022	IPR004158	Protein of unknown function DUF247, plant
KYUSt_chr2.53353	59ba76159636fcc9487abd1893c65d09	204	MobiDBLite	mobidb-lite	consensus disorder prediction	1	27	-	T	30-05-2022	-	-
KYUSt_chr2.53353	59ba76159636fcc9487abd1893c65d09	204	PANTHER	PTHR33402:SF19	VQ MOTIF-CONTAINING PROTEIN 11	20	202	5e-49	T	30-05-2022	-	-
KYUSt_chr2.53353	59ba76159636fcc9487abd1893c65d09	204	PANTHER	PTHR33402	VQ MOTIF-CONTAINING PROTEIN 11-LIKE	20	202	5e-49	T	30-05-2022	IPR039611	VQ motif-containing protein 4/11/13/19/31/33
KYUSt_chr2.53353	59ba76159636fcc9487abd1893c65d09	204	Pfam	PF05678	VQ motif	25	49	1.8e-12	T	30-05-2022	IPR008889	VQ
KYUSt_chr2.53353	59ba76159636fcc9487abd1893c65d09	204	MobiDBLite	mobidb-lite	consensus disorder prediction	173	204	-	T	30-05-2022	-	-
KYUSt_chr2.53421	0456c6e5ff125ef91dddac716bf35b08	116	MobiDBLite	mobidb-lite	consensus disorder prediction	90	116	-	T	30-05-2022	-	-
KYUSt_chr2.53421	0456c6e5ff125ef91dddac716bf35b08	116	PANTHER	PTHR10252:SF41	HAP5 SUBUNIT OF HAP COMPLEX	1	90	2.4e-33	T	30-05-2022	-	-
KYUSt_chr2.53421	0456c6e5ff125ef91dddac716bf35b08	116	Gene3D	G3DSA:1.10.20.10	Histone, subunit A	1	86	3.7e-26	T	30-05-2022	IPR009072	Histone-fold
KYUSt_chr2.53421	0456c6e5ff125ef91dddac716bf35b08	116	SUPERFAMILY	SSF47113	Histone-fold	2	98	5.76e-20	T	30-05-2022	IPR009072	Histone-fold
KYUSt_chr2.53421	0456c6e5ff125ef91dddac716bf35b08	116	Pfam	PF00808	Histone-like transcription factor (CBF/NF-Y) and archaeal histone	1	72	8.8e-12	T	30-05-2022	IPR003958	Transcription factor CBF/NF-Y/archaeal histone domain
KYUSt_chr2.53421	0456c6e5ff125ef91dddac716bf35b08	116	PANTHER	PTHR10252	HISTONE-LIKE TRANSCRIPTION FACTOR CCAAT-RELATED	1	90	2.4e-33	T	30-05-2022	-	-
ZDUF_1	ff12410ce203a440d603b160202323b3	582	PANTHER	PTHR31549:SF211	-	40	575	6.7e-173	T	30-05-2022	-	-
ZDUF_1	ff12410ce203a440d603b160202323b3	582	PANTHER	PTHR31549	PROTEIN, PUTATIVE (DUF247)-RELATED-RELATED	40	575	6.7e-173	T	30-05-2022	IPR004158	Protein of unknown function DUF247, plant
ZDUF_1	ff12410ce203a440d603b160202323b3	582	Pfam	PF03140	Plant protein of unknown function	73	565	9.4e-105	T	30-05-2022	IPR004158	Protein of unknown function DUF247, plant
KYUSt_chr1.6210	c776e9b7953b7faf808e6c3a43bcbb55	243	CDD	cd06822	PLPDE_III_YBL036c_euk	14	235	9.17532e-131	T	30-05-2022	-	-
KYUSt_chr1.6210	c776e9b7953b7faf808e6c3a43bcbb55	243	Pfam	PF01168	Alanine racemase, N-terminal domain	22	237	7e-23	T	30-05-2022	IPR001608	Alanine racemase, N-terminal
KYUSt_chr1.6210	c776e9b7953b7faf808e6c3a43bcbb55	243	ProSitePatterns	PS01211	Uncharacterized protein family UPF0001 signature.	81	95	-	T	30-05-2022	IPR011078	Pyridoxal phosphate homeostasis protein
KYUSt_chr1.6210	c776e9b7953b7faf808e6c3a43bcbb55	243	TIGRFAM	TIGR00044	TIGR00044: pyridoxal phosphate enzyme, YggS family	21	237	3.3e-60	T	30-05-2022	IPR011078	Pyridoxal phosphate homeostasis protein
KYUSt_chr1.6210	c776e9b7953b7faf808e6c3a43bcbb55	243	Gene3D	G3DSA:3.20.20.10	Alanine racemase	2	243	4.6e-95	T	30-05-2022	IPR029066	PLP-binding barrel
KYUSt_chr1.6210	c776e9b7953b7faf808e6c3a43bcbb55	243	PANTHER	PTHR10146:SF15	PYRIDOXAL PHOSPHATE HOMEOSTASIS PROTEIN	5	242	7.6e-121	T	30-05-2022	-	-
KYUSt_chr1.6210	c776e9b7953b7faf808e6c3a43bcbb55	243	PIRSF	PIRSF004848	YBL036c_PLPDEIII	1	243	7.7e-84	T	30-05-2022	IPR011078	Pyridoxal phosphate homeostasis protein
KYUSt_chr1.6210	c776e9b7953b7faf808e6c3a43bcbb55	243	SUPERFAMILY	SSF51419	PLP-binding barrel	9	235	5.52e-74	T	30-05-2022	IPR029066	PLP-binding barrel
KYUSt_chr1.6210	c776e9b7953b7faf808e6c3a43bcbb55	243	PANTHER	PTHR10146	PROLINE SYNTHETASE CO-TRANSCRIBED BACTERIAL HOMOLOG PROTEIN	5	242	7.6e-121	T	30-05-2022	IPR011078	Pyridoxal phosphate homeostasis protein
KYUSt_chr1.6210	c776e9b7953b7faf808e6c3a43bcbb55	243	Hamap	MF_02087	Pyridoxal phosphate homeostasis protein.	12	236	30.8772	T	30-05-2022	IPR011078	Pyridoxal phosphate homeostasis protein
KYUSt_chr1.6176	8cf24b922fa9b375731757afd9a3a70b	834	MobiDBLite	mobidb-lite	consensus disorder prediction	351	367	-	T	30-05-2022	-	-
KYUSt_chr1.6176	8cf24b922fa9b375731757afd9a3a70b	834	Pfam	PF14559	Tetratricopeptide repeat	116	165	3.2e-06	T	30-05-2022	-	-
KYUSt_chr1.6176	8cf24b922fa9b375731757afd9a3a70b	834	Pfam	PF14559	Tetratricopeptide repeat	249	299	2e-06	T	30-05-2022	-	-
KYUSt_chr1.6176	8cf24b922fa9b375731757afd9a3a70b	834	Gene3D	G3DSA:1.25.40.10	Tetratricopeptide repeat domain	13	243	4.7e-22	T	30-05-2022	IPR011990	Tetratricopeptide-like helical domain superfamily
KYUSt_chr1.6176	8cf24b922fa9b375731757afd9a3a70b	834	SMART	SM00028	tpr_5	230	264	190	T	30-05-2022	IPR019734	Tetratricopeptide repeat
KYUSt_chr1.6176	8cf24b922fa9b375731757afd9a3a70b	834	SMART	SM00028	tpr_5	76	108	450	T	30-05-2022	IPR019734	Tetratricopeptide repeat
KYUSt_chr1.6176	8cf24b922fa9b375731757afd9a3a70b	834	SMART	SM00028	tpr_5	298	331	2.8	T	30-05-2022	IPR019734	Tetratricopeptide repeat
KYUSt_chr1.6176	8cf24b922fa9b375731757afd9a3a70b	834	SMART	SM00028	tpr_5	8	41	170	T	30-05-2022	IPR019734	Tetratricopeptide repeat
KYUSt_chr1.6176	8cf24b922fa9b375731757afd9a3a70b	834	SUPERFAMILY	SSF48452	TPR-like	19	334	5.46e-24	T	30-05-2022	IPR011990	Tetratricopeptide-like helical domain superfamily
KYUSt_chr1.6176	8cf24b922fa9b375731757afd9a3a70b	834	Pfam	PF03478	Protein of unknown function (DUF295)	735	804	6.3e-10	T	30-05-2022	IPR005174	Domain unknown function DUF295
KYUSt_chr1.6176	8cf24b922fa9b375731757afd9a3a70b	834	Gene3D	G3DSA:1.25.40.10	Tetratricopeptide repeat domain	244	371	1.5e-11	T	30-05-2022	IPR011990	Tetratricopeptide-like helical domain superfamily
KYUSt_chr1.6176	8cf24b922fa9b375731757afd9a3a70b	834	ProSiteProfiles	PS50005	TPR repeat profile.	298	331	8.9684	T	30-05-2022	IPR019734	Tetratricopeptide repeat
KYUSt_chr1.6176	8cf24b922fa9b375731757afd9a3a70b	834	MobiDBLite	mobidb-lite	consensus disorder prediction	347	367	-	T	30-05-2022	-	-
KYUSt_chr1.6176	8cf24b922fa9b375731757afd9a3a70b	834	PANTHER	PTHR45560	OS04G0163150 PROTEIN-RELATED	414	834	2.3e-172	T	30-05-2022	-	-
KYUSt_chr1.6176	8cf24b922fa9b375731757afd9a3a70b	834	PANTHER	PTHR45560:SF4	-	414	834	2.3e-172	T	30-05-2022	-	-
KYUSt_chr2.53369	5bcc80deeb8b56bf276952c9d4f4a3e6	230	MobiDBLite	mobidb-lite	consensus disorder prediction	101	131	-	T	30-05-2022	-	-
KYUSt_chr2.53369	5bcc80deeb8b56bf276952c9d4f4a3e6	230	MobiDBLite	mobidb-lite	consensus disorder prediction	65	79	-	T	30-05-2022	-	-
KYUSt_chr2.53369	5bcc80deeb8b56bf276952c9d4f4a3e6	230	MobiDBLite	mobidb-lite	consensus disorder prediction	36	79	-	T	30-05-2022	-	-
KYUSt_chr1.6215	acd376fd5990867f3ec44f343fdd88ed	95	PANTHER	PTHR11588	TUBULIN	36	91	2.5e-31	T	30-05-2022	IPR000217	Tubulin
KYUSt_chr1.6215	acd376fd5990867f3ec44f343fdd88ed	95	SUPERFAMILY	SSF52490	Tubulin nucleotide-binding domain-like	36	91	3.51e-15	T	30-05-2022	IPR036525	Tubulin/FtsZ, GTPase domain superfamily
KYUSt_chr1.6215	acd376fd5990867f3ec44f343fdd88ed	95	PANTHER	PTHR11588:SF351	TUBULIN BETA-2 CHAIN	36	91	2.5e-31	T	30-05-2022	-	-
KYUSt_chr1.6215	acd376fd5990867f3ec44f343fdd88ed	95	Gene3D	G3DSA:3.40.50.1440	Tubulin/FtsZ, GTPase domain	36	93	3.6e-18	T	30-05-2022	IPR036525	Tubulin/FtsZ, GTPase domain superfamily
KYUSt_chr1.6215	acd376fd5990867f3ec44f343fdd88ed	95	Pfam	PF00091	Tubulin/FtsZ family, GTPase domain	38	90	4.2e-08	T	30-05-2022	IPR003008	Tubulin/FtsZ, GTPase domain
KYUSt_chr1.6308	277288afeaa414bef1eb0d1e8558c473	1105	MobiDBLite	mobidb-lite	consensus disorder prediction	7	62	-	T	30-05-2022	-	-
KYUSt_chr1.6308	277288afeaa414bef1eb0d1e8558c473	1105	SUPERFAMILY	SSF101224	HAND domain of the nucleosome remodeling ATPase ISWI	789	878	5.89e-25	T	30-05-2022	IPR036306	ISWI, HAND domain superfamily
KYUSt_chr1.6308	277288afeaa414bef1eb0d1e8558c473	1105	SUPERFAMILY	SSF52540	P-loop containing nucleoside triphosphate hydrolases	210	441	3.66e-59	T	30-05-2022	IPR027417	P-loop containing nucleoside triphosphate hydrolase
KYUSt_chr1.6308	277288afeaa414bef1eb0d1e8558c473	1105	Pfam	PF09110	HAND	790	875	1.6e-09	T	30-05-2022	IPR015194	ISWI, HAND domain
KYUSt_chr1.6308	277288afeaa414bef1eb0d1e8558c473	1105	SMART	SM00490	helicmild6	557	641	1.4e-24	T	30-05-2022	IPR001650	Helicase, C-terminal
KYUSt_chr1.6308	277288afeaa414bef1eb0d1e8558c473	1105	CDD	cd17997	DEXHc_SMARCA1_SMARCA5	223	443	3.23388e-139	T	30-05-2022	IPR044754	Isw1/2, N-terminal
KYUSt_chr1.6308	277288afeaa414bef1eb0d1e8558c473	1105	CDD	cd18793	SF2_C_SNF	527	652	7.01913e-53	T	30-05-2022	-	-
KYUSt_chr1.6308	277288afeaa414bef1eb0d1e8558c473	1105	MobiDBLite	mobidb-lite	consensus disorder prediction	1047	1090	-	T	30-05-2022	-	-
KYUSt_chr1.6308	277288afeaa414bef1eb0d1e8558c473	1105	Gene3D	G3DSA:1.10.10.60	-	964	1067	1e-39	T	30-05-2022	-	-
KYUSt_chr1.6308	277288afeaa414bef1eb0d1e8558c473	1105	Gene3D	G3DSA:1.10.10.60	-	876	930	3.7e-23	T	30-05-2022	-	-
KYUSt_chr1.6308	277288afeaa414bef1eb0d1e8558c473	1105	Gene3D	G3DSA:3.40.50.10810	-	227	442	9.3e-73	T	30-05-2022	IPR038718	SNF2-like, N-terminal domain superfamily
KYUSt_chr1.6308	277288afeaa414bef1eb0d1e8558c473	1105	Coils	Coil	Coil	1026	1060	-	T	30-05-2022	-	-
KYUSt_chr1.6308	277288afeaa414bef1eb0d1e8558c473	1105	MobiDBLite	mobidb-lite	consensus disorder prediction	1	126	-	T	30-05-2022	-	-
KYUSt_chr1.6308	277288afeaa414bef1eb0d1e8558c473	1105	Gene3D	G3DSA:1.10.1040.30	ISWI, HAND domain	778	875	2.1e-21	T	30-05-2022	IPR036306	ISWI, HAND domain superfamily
KYUSt_chr1.6308	277288afeaa414bef1eb0d1e8558c473	1105	PANTHER	PTHR10799:SF986	OS05G0150300 PROTEIN	8	1094	0	T	30-05-2022	-	-
KYUSt_chr1.6308	277288afeaa414bef1eb0d1e8558c473	1105	MobiDBLite	mobidb-lite	consensus disorder prediction	172	200	-	T	30-05-2022	-	-
KYUSt_chr1.6308	277288afeaa414bef1eb0d1e8558c473	1105	Pfam	PF09111	SLIDE	933	1043	2.1e-44	T	30-05-2022	IPR015195	SLIDE domain
KYUSt_chr1.6308	277288afeaa414bef1eb0d1e8558c473	1105	SUPERFAMILY	SSF52540	P-loop containing nucleoside triphosphate hydrolases	443	724	8.44e-74	T	30-05-2022	IPR027417	P-loop containing nucleoside triphosphate hydrolase
KYUSt_chr1.6308	277288afeaa414bef1eb0d1e8558c473	1105	SMART	SM00717	sant	978	1039	8.3	T	30-05-2022	IPR001005	SANT/Myb domain
KYUSt_chr1.6308	277288afeaa414bef1eb0d1e8558c473	1105	SMART	SM00717	sant	876	925	1.1e-06	T	30-05-2022	IPR001005	SANT/Myb domain
KYUSt_chr1.6308	277288afeaa414bef1eb0d1e8558c473	1105	ProSiteProfiles	PS51194	Superfamilies 1 and 2 helicase C-terminal domain profile.	531	682	19.6909	T	30-05-2022	IPR001650	Helicase, C-terminal
KYUSt_chr1.6308	277288afeaa414bef1eb0d1e8558c473	1105	ProSiteProfiles	PS51192	Superfamilies 1 and 2 helicase ATP-binding type-1 domain profile.	238	403	25.5171	T	30-05-2022	IPR014001	Helicase superfamily 1/2, ATP-binding domain
KYUSt_chr1.6308	277288afeaa414bef1eb0d1e8558c473	1105	MobiDBLite	mobidb-lite	consensus disorder prediction	851	865	-	T	30-05-2022	-	-
KYUSt_chr1.6308	277288afeaa414bef1eb0d1e8558c473	1105	Pfam	PF00271	Helicase conserved C-terminal domain	529	641	8.3e-19	T	30-05-2022	IPR001650	Helicase, C-terminal
KYUSt_chr1.6308	277288afeaa414bef1eb0d1e8558c473	1105	SUPERFAMILY	SSF46689	Homeodomain-like	931	1052	7.09e-45	T	30-05-2022	IPR009057	Homeobox-like domain superfamily
KYUSt_chr1.6308	277288afeaa414bef1eb0d1e8558c473	1105	MobiDBLite	mobidb-lite	consensus disorder prediction	72	109	-	T	30-05-2022	-	-
KYUSt_chr1.6308	277288afeaa414bef1eb0d1e8558c473	1105	MobiDBLite	mobidb-lite	consensus disorder prediction	1064	1087	-	T	30-05-2022	-	-
KYUSt_chr1.6308	277288afeaa414bef1eb0d1e8558c473	1105	Pfam	PF00176	SNF2-related domain	239	506	2.6e-78	T	30-05-2022	IPR000330	SNF2, N-terminal
KYUSt_chr1.6308	277288afeaa414bef1eb0d1e8558c473	1105	ProSiteProfiles	PS51293	SANT domain profile.	875	927	15.503	T	30-05-2022	IPR017884	SANT domain
KYUSt_chr1.6308	277288afeaa414bef1eb0d1e8558c473	1105	SUPERFAMILY	SSF46689	Homeodomain-like	880	929	2.2e-13	T	30-05-2022	IPR009057	Homeobox-like domain superfamily
KYUSt_chr1.6308	277288afeaa414bef1eb0d1e8558c473	1105	SMART	SM00487	ultradead3	222	414	1.1e-35	T	30-05-2022	IPR014001	Helicase superfamily 1/2, ATP-binding domain
KYUSt_chr1.6308	277288afeaa414bef1eb0d1e8558c473	1105	MobiDBLite	mobidb-lite	consensus disorder prediction	1047	1063	-	T	30-05-2022	-	-
KYUSt_chr1.6308	277288afeaa414bef1eb0d1e8558c473	1105	Gene3D	G3DSA:3.40.50.300	-	447	739	1.7e-125	T	30-05-2022	IPR027417	P-loop containing nucleoside triphosphate hydrolase
KYUSt_chr1.6308	277288afeaa414bef1eb0d1e8558c473	1105	Gene3D	G3DSA:1.20.5.1190	iswi atpase	931	963	1.8e-05	T	30-05-2022	-	-
KYUSt_chr1.6308	277288afeaa414bef1eb0d1e8558c473	1105	PANTHER	PTHR10799	SNF2/RAD54 HELICASE FAMILY	8	1094	0	T	30-05-2022	-	-
KYUSt_chr1.6308	277288afeaa414bef1eb0d1e8558c473	1105	CDD	cd00167	SANT	879	923	5.17949e-07	T	30-05-2022	IPR001005	SANT/Myb domain
KYUSt_chr1.6308	277288afeaa414bef1eb0d1e8558c473	1105	MobiDBLite	mobidb-lite	consensus disorder prediction	175	193	-	T	30-05-2022	-	-
KYUSt_chr1.6308	277288afeaa414bef1eb0d1e8558c473	1105	MobiDBLite	mobidb-lite	consensus disorder prediction	844	865	-	T	30-05-2022	-	-
KYUSt_chr2.53330	9b0bc5ad3d6e7cd58257381c15afc3dc	609	Gene3D	G3DSA:3.80.10.10	Ribonuclease Inhibitor	79	248	6.4e-25	T	30-05-2022	IPR032675	Leucine-rich repeat domain superfamily
KYUSt_chr2.53330	9b0bc5ad3d6e7cd58257381c15afc3dc	609	MobiDBLite	mobidb-lite	consensus disorder prediction	1	71	-	T	30-05-2022	-	-
KYUSt_chr2.53330	9b0bc5ad3d6e7cd58257381c15afc3dc	609	PRINTS	PR00019	Leucine-rich repeat signature	408	421	2.1e-05	T	30-05-2022	-	-
KYUSt_chr2.53330	9b0bc5ad3d6e7cd58257381c15afc3dc	609	PRINTS	PR00019	Leucine-rich repeat signature	149	162	2.1e-05	T	30-05-2022	-	-
KYUSt_chr2.53330	9b0bc5ad3d6e7cd58257381c15afc3dc	609	PANTHER	PTHR48062	RECEPTOR-LIKE PROTEIN 14	92	161	1.6e-223	T	30-05-2022	-	-
KYUSt_chr2.53330	9b0bc5ad3d6e7cd58257381c15afc3dc	609	PANTHER	PTHR48062	RECEPTOR-LIKE PROTEIN 14	157	603	1.6e-223	T	30-05-2022	-	-
KYUSt_chr2.53330	9b0bc5ad3d6e7cd58257381c15afc3dc	609	SUPERFAMILY	SSF52058	L domain-like	99	263	1.21e-22	T	30-05-2022	-	-
KYUSt_chr2.53330	9b0bc5ad3d6e7cd58257381c15afc3dc	609	MobiDBLite	mobidb-lite	consensus disorder prediction	31	54	-	T	30-05-2022	-	-
KYUSt_chr2.53330	9b0bc5ad3d6e7cd58257381c15afc3dc	609	Gene3D	G3DSA:3.80.10.10	Ribonuclease Inhibitor	249	606	2.2e-80	T	30-05-2022	IPR032675	Leucine-rich repeat domain superfamily
KYUSt_chr2.53330	9b0bc5ad3d6e7cd58257381c15afc3dc	609	SUPERFAMILY	SSF52058	L domain-like	249	582	2.04e-44	T	30-05-2022	-	-
KYUSt_chr2.53330	9b0bc5ad3d6e7cd58257381c15afc3dc	609	Pfam	PF00560	Leucine Rich Repeat	148	168	0.39	T	30-05-2022	IPR001611	Leucine-rich repeat
KYUSt_chr2.53330	9b0bc5ad3d6e7cd58257381c15afc3dc	609	Pfam	PF00560	Leucine Rich Repeat	411	431	0.88	T	30-05-2022	IPR001611	Leucine-rich repeat
KYUSt_chr2.53330	9b0bc5ad3d6e7cd58257381c15afc3dc	609	PANTHER	PTHR48062:SF32	OS04G0648400 PROTEIN	92	161	1.6e-223	T	30-05-2022	-	-
KYUSt_chr2.53330	9b0bc5ad3d6e7cd58257381c15afc3dc	609	Pfam	PF13855	Leucine rich repeat	269	328	1.1e-06	T	30-05-2022	IPR001611	Leucine-rich repeat
KYUSt_chr2.53330	9b0bc5ad3d6e7cd58257381c15afc3dc	609	PANTHER	PTHR48062:SF32	OS04G0648400 PROTEIN	157	603	1.6e-223	T	30-05-2022	-	-
KYUSt_chr2.53335	8d56ca4cc398cde394b04bed9b88371f	1954	MobiDBLite	mobidb-lite	consensus disorder prediction	604	621	-	T	30-05-2022	-	-
KYUSt_chr2.53335	8d56ca4cc398cde394b04bed9b88371f	1954	MobiDBLite	mobidb-lite	consensus disorder prediction	519	533	-	T	30-05-2022	-	-
KYUSt_chr2.53335	8d56ca4cc398cde394b04bed9b88371f	1954	SMART	SM00343	c2hcfinal6	228	244	0.017	T	30-05-2022	IPR001878	Zinc finger, CCHC-type
KYUSt_chr2.53335	8d56ca4cc398cde394b04bed9b88371f	1954	SMART	SM00343	c2hcfinal6	247	263	0.3	T	30-05-2022	IPR001878	Zinc finger, CCHC-type
KYUSt_chr2.53335	8d56ca4cc398cde394b04bed9b88371f	1954	MobiDBLite	mobidb-lite	consensus disorder prediction	648	692	-	T	30-05-2022	-	-
KYUSt_chr2.53335	8d56ca4cc398cde394b04bed9b88371f	1954	SUPERFAMILY	SSF56219	DNase I-like	806	967	2.01e-10	T	30-05-2022	IPR036691	Endonuclease/exonuclease/phosphatase superfamily
KYUSt_chr2.53335	8d56ca4cc398cde394b04bed9b88371f	1954	PANTHER	PTHR33116	REVERSE TRANSCRIPTASE ZINC-BINDING DOMAIN-CONTAINING PROTEIN-RELATED-RELATED	921	1850	4.5e-113	T	30-05-2022	-	-
KYUSt_chr2.53335	8d56ca4cc398cde394b04bed9b88371f	1954	PANTHER	PTHR33116:SF38	OS01G0158850 PROTEIN	921	1850	4.5e-113	T	30-05-2022	-	-
KYUSt_chr2.53335	8d56ca4cc398cde394b04bed9b88371f	1954	SUPERFAMILY	SSF57756	Retrovirus zinc finger-like domains	219	264	1.16e-08	T	30-05-2022	IPR036875	Zinc finger, CCHC-type superfamily
KYUSt_chr2.53335	8d56ca4cc398cde394b04bed9b88371f	1954	CDD	cd01650	RT_nLTR_like	1241	1505	6.69219e-58	T	30-05-2022	-	-
KYUSt_chr2.53335	8d56ca4cc398cde394b04bed9b88371f	1954	Pfam	PF00078	Reverse transcriptase (RNA-dependent DNA polymerase)	1247	1504	5e-34	T	30-05-2022	IPR000477	Reverse transcriptase domain
KYUSt_chr2.53335	8d56ca4cc398cde394b04bed9b88371f	1954	MobiDBLite	mobidb-lite	consensus disorder prediction	491	511	-	T	30-05-2022	-	-
KYUSt_chr2.53335	8d56ca4cc398cde394b04bed9b88371f	1954	MobiDBLite	mobidb-lite	consensus disorder prediction	169	219	-	T	30-05-2022	-	-
KYUSt_chr2.53335	8d56ca4cc398cde394b04bed9b88371f	1954	Pfam	PF13966	zinc-binding in reverse transcriptase	1766	1848	1.1e-19	T	30-05-2022	IPR026960	Reverse transcriptase zinc-binding domain
KYUSt_chr2.53335	8d56ca4cc398cde394b04bed9b88371f	1954	MobiDBLite	mobidb-lite	consensus disorder prediction	590	629	-	T	30-05-2022	-	-
KYUSt_chr2.53335	8d56ca4cc398cde394b04bed9b88371f	1954	ProSiteProfiles	PS50158	Zinc finger CCHC-type profile.	229	242	9.60327	T	30-05-2022	IPR001878	Zinc finger, CCHC-type
KYUSt_chr2.53335	8d56ca4cc398cde394b04bed9b88371f	1954	Gene3D	G3DSA:4.10.60.10	-	206	269	3.4e-08	T	30-05-2022	-	-
KYUSt_chr2.53335	8d56ca4cc398cde394b04bed9b88371f	1954	MobiDBLite	mobidb-lite	consensus disorder prediction	1	157	-	T	30-05-2022	-	-
KYUSt_chr2.53335	8d56ca4cc398cde394b04bed9b88371f	1954	MobiDBLite	mobidb-lite	consensus disorder prediction	459	539	-	T	30-05-2022	-	-
KYUSt_chr2.53335	8d56ca4cc398cde394b04bed9b88371f	1954	SUPERFAMILY	SSF56672	DNA/RNA polymerases	1190	1579	1.41e-21	T	30-05-2022	IPR043502	DNA/RNA polymerase superfamily
KYUSt_chr2.53335	8d56ca4cc398cde394b04bed9b88371f	1954	MobiDBLite	mobidb-lite	consensus disorder prediction	91	106	-	T	30-05-2022	-	-
KYUSt_chr2.53335	8d56ca4cc398cde394b04bed9b88371f	1954	Pfam	PF00098	Zinc knuckle	228	243	0.0018	T	30-05-2022	IPR001878	Zinc finger, CCHC-type
KYUSt_chr2.53335	8d56ca4cc398cde394b04bed9b88371f	1954	ProSiteProfiles	PS50878	Reverse transcriptase (RT) catalytic domain profile.	1227	1505	17.3622	T	30-05-2022	IPR000477	Reverse transcriptase domain
KYUSt_chr2.53292	c69d275ec6fa94d8de7850778de1af23	496	MobiDBLite	mobidb-lite	consensus disorder prediction	1	47	-	T	30-05-2022	-	-
KYUSt_chr2.53292	c69d275ec6fa94d8de7850778de1af23	496	Pfam	PF07224	Chlorophyllase	186	490	1.8e-101	T	30-05-2022	IPR017395	Chlorophyllase
KYUSt_chr2.53292	c69d275ec6fa94d8de7850778de1af23	496	PANTHER	PTHR33428	CHLOROPHYLLASE-2, CHLOROPLASTIC	185	495	1.7e-113	T	30-05-2022	-	-
KYUSt_chr2.53292	c69d275ec6fa94d8de7850778de1af23	496	Gene3D	G3DSA:3.40.50.1820	alpha/beta hydrolase	199	484	3.9e-28	T	30-05-2022	IPR029058	Alpha/Beta hydrolase fold
KYUSt_chr2.53292	c69d275ec6fa94d8de7850778de1af23	496	SUPERFAMILY	SSF53474	alpha/beta-Hydrolases	218	474	2.22e-23	T	30-05-2022	IPR029058	Alpha/Beta hydrolase fold
KYUSt_chr1.6161	b68325ed22745abe86a4153070aa8a4e	1005	SUPERFAMILY	SSF50998	Quinoprotein alcohol dehydrogenase-like	663	980	7.06e-06	T	30-05-2022	IPR011047	Quinoprotein alcohol dehydrogenase-like superfamily
KYUSt_chr1.6161	b68325ed22745abe86a4153070aa8a4e	1005	SUPERFAMILY	SSF48452	TPR-like	219	514	1.47e-24	T	30-05-2022	IPR011990	Tetratricopeptide-like helical domain superfamily
KYUSt_chr1.6161	b68325ed22745abe86a4153070aa8a4e	1005	Gene3D	G3DSA:1.25.40.10	Tetratricopeptide repeat domain	4	152	5.6e-42	T	30-05-2022	IPR011990	Tetratricopeptide-like helical domain superfamily
KYUSt_chr1.6161	b68325ed22745abe86a4153070aa8a4e	1005	MobiDBLite	mobidb-lite	consensus disorder prediction	531	547	-	T	30-05-2022	-	-
KYUSt_chr1.6161	b68325ed22745abe86a4153070aa8a4e	1005	Pfam	PF03478	Protein of unknown function (DUF295)	907	975	1.2e-10	T	30-05-2022	IPR005174	Domain unknown function DUF295
KYUSt_chr1.6161	b68325ed22745abe86a4153070aa8a4e	1005	ProSiteProfiles	PS50005	TPR repeat profile.	478	511	8.9684	T	30-05-2022	IPR019734	Tetratricopeptide repeat
KYUSt_chr1.6161	b68325ed22745abe86a4153070aa8a4e	1005	Pfam	PF14559	Tetratricopeptide repeat	429	479	2.6e-06	T	30-05-2022	-	-
KYUSt_chr1.6161	b68325ed22745abe86a4153070aa8a4e	1005	MobiDBLite	mobidb-lite	consensus disorder prediction	77	105	-	T	30-05-2022	-	-
KYUSt_chr1.6161	b68325ed22745abe86a4153070aa8a4e	1005	Gene3D	G3DSA:1.25.40.10	Tetratricopeptide repeat domain	207	527	8.4e-35	T	30-05-2022	IPR011990	Tetratricopeptide-like helical domain superfamily
KYUSt_chr1.6161	b68325ed22745abe86a4153070aa8a4e	1005	PANTHER	PTHR12558	CELL DIVISION CYCLE 16,23,27	5	544	5.3e-206	T	30-05-2022	-	-
KYUSt_chr1.6161	b68325ed22745abe86a4153070aa8a4e	1005	MobiDBLite	mobidb-lite	consensus disorder prediction	527	547	-	T	30-05-2022	-	-
KYUSt_chr1.6161	b68325ed22745abe86a4153070aa8a4e	1005	SUPERFAMILY	SSF48452	TPR-like	43	184	2.4e-07	T	30-05-2022	IPR011990	Tetratricopeptide-like helical domain superfamily
KYUSt_chr1.6161	b68325ed22745abe86a4153070aa8a4e	1005	PANTHER	PTHR12558:SF36	ANAPHASE-PROMOTING COMPLEX SUBUNIT 7	5	544	5.3e-206	T	30-05-2022	-	-
KYUSt_chr1.6161	b68325ed22745abe86a4153070aa8a4e	1005	SMART	SM00028	tpr_5	410	444	190	T	30-05-2022	IPR019734	Tetratricopeptide repeat
KYUSt_chr1.6161	b68325ed22745abe86a4153070aa8a4e	1005	SMART	SM00028	tpr_5	350	383	6.8	T	30-05-2022	IPR019734	Tetratricopeptide repeat
KYUSt_chr1.6161	b68325ed22745abe86a4153070aa8a4e	1005	SMART	SM00028	tpr_5	478	511	2.8	T	30-05-2022	IPR019734	Tetratricopeptide repeat
KYUSt_chr1.6161	b68325ed22745abe86a4153070aa8a4e	1005	SMART	SM00028	tpr_5	141	174	180	T	30-05-2022	IPR019734	Tetratricopeptide repeat
KYUSt_chr1.6161	b68325ed22745abe86a4153070aa8a4e	1005	SMART	SM00028	tpr_5	249	282	9.5	T	30-05-2022	IPR019734	Tetratricopeptide repeat
KYUSt_chr1.6161	b68325ed22745abe86a4153070aa8a4e	1005	SMART	SM00028	tpr_5	43	76	61	T	30-05-2022	IPR019734	Tetratricopeptide repeat
KYUSt_chr2.53381	07ba0c3d450b5fe565f326d25516fcf5	213	MobiDBLite	mobidb-lite	consensus disorder prediction	1	28	-	T	30-05-2022	-	-
KYUSt_chr2.53381	07ba0c3d450b5fe565f326d25516fcf5	213	MobiDBLite	mobidb-lite	consensus disorder prediction	92	118	-	T	30-05-2022	-	-
KYUSt_chr2.53381	07ba0c3d450b5fe565f326d25516fcf5	213	MobiDBLite	mobidb-lite	consensus disorder prediction	55	70	-	T	30-05-2022	-	-
KYUSt_chr2.53381	07ba0c3d450b5fe565f326d25516fcf5	213	MobiDBLite	mobidb-lite	consensus disorder prediction	41	70	-	T	30-05-2022	-	-
KYUSt_chr2.53254	bd9216b2b6a89abb2e6aeecdb8e26eeb	484	SUPERFAMILY	SSF54171	DNA-binding domain	215	274	2.16e-17	T	30-05-2022	IPR016177	DNA-binding domain superfamily
KYUSt_chr2.53254	bd9216b2b6a89abb2e6aeecdb8e26eeb	484	SMART	SM00380	rav1_2	125	187	3.1e-31	T	30-05-2022	IPR001471	AP2/ERF domain
KYUSt_chr2.53254	bd9216b2b6a89abb2e6aeecdb8e26eeb	484	SMART	SM00380	rav1_2	216	279	1.3e-33	T	30-05-2022	IPR001471	AP2/ERF domain
KYUSt_chr2.53254	bd9216b2b6a89abb2e6aeecdb8e26eeb	484	PANTHER	PTHR32467	AP2-LIKE ETHYLENE-RESPONSIVE TRANSCRIPTION FACTOR	1	465	2.7e-155	T	30-05-2022	-	-
KYUSt_chr2.53254	bd9216b2b6a89abb2e6aeecdb8e26eeb	484	MobiDBLite	mobidb-lite	consensus disorder prediction	427	442	-	T	30-05-2022	-	-
KYUSt_chr2.53254	bd9216b2b6a89abb2e6aeecdb8e26eeb	484	MobiDBLite	mobidb-lite	consensus disorder prediction	287	324	-	T	30-05-2022	-	-
KYUSt_chr2.53254	bd9216b2b6a89abb2e6aeecdb8e26eeb	484	MobiDBLite	mobidb-lite	consensus disorder prediction	1	53	-	T	30-05-2022	-	-
KYUSt_chr2.53254	bd9216b2b6a89abb2e6aeecdb8e26eeb	484	CDD	cd00018	AP2	215	275	3.51862e-25	T	30-05-2022	IPR001471	AP2/ERF domain
KYUSt_chr2.53254	bd9216b2b6a89abb2e6aeecdb8e26eeb	484	Pfam	PF00847	AP2 domain	125	173	4.9e-10	T	30-05-2022	IPR001471	AP2/ERF domain
KYUSt_chr2.53254	bd9216b2b6a89abb2e6aeecdb8e26eeb	484	Pfam	PF00847	AP2 domain	215	264	5.3e-10	T	30-05-2022	IPR001471	AP2/ERF domain
KYUSt_chr2.53254	bd9216b2b6a89abb2e6aeecdb8e26eeb	484	SUPERFAMILY	SSF54171	DNA-binding domain	124	182	8.5e-16	T	30-05-2022	IPR016177	DNA-binding domain superfamily
KYUSt_chr2.53254	bd9216b2b6a89abb2e6aeecdb8e26eeb	484	Gene3D	G3DSA:3.30.730.10	AP2/ERF domain	215	274	1.8e-21	T	30-05-2022	IPR036955	AP2/ERF domain superfamily
KYUSt_chr2.53254	bd9216b2b6a89abb2e6aeecdb8e26eeb	484	Gene3D	G3DSA:3.30.730.10	AP2/ERF domain	124	182	6.4e-26	T	30-05-2022	IPR036955	AP2/ERF domain superfamily
KYUSt_chr2.53254	bd9216b2b6a89abb2e6aeecdb8e26eeb	484	PANTHER	PTHR32467:SF142	FLORAL HOMEOTIC PROTEIN APETALA 2	1	465	2.7e-155	T	30-05-2022	-	-
KYUSt_chr2.53254	bd9216b2b6a89abb2e6aeecdb8e26eeb	484	MobiDBLite	mobidb-lite	consensus disorder prediction	404	418	-	T	30-05-2022	-	-
KYUSt_chr2.53254	bd9216b2b6a89abb2e6aeecdb8e26eeb	484	ProSiteProfiles	PS51032	AP2/ERF domain profile.	216	273	16.1861	T	30-05-2022	IPR001471	AP2/ERF domain
KYUSt_chr2.53254	bd9216b2b6a89abb2e6aeecdb8e26eeb	484	MobiDBLite	mobidb-lite	consensus disorder prediction	293	310	-	T	30-05-2022	-	-
KYUSt_chr2.53254	bd9216b2b6a89abb2e6aeecdb8e26eeb	484	ProSiteProfiles	PS51032	AP2/ERF domain profile.	125	181	17.754	T	30-05-2022	IPR001471	AP2/ERF domain
KYUSt_chr2.53254	bd9216b2b6a89abb2e6aeecdb8e26eeb	484	MobiDBLite	mobidb-lite	consensus disorder prediction	351	446	-	T	30-05-2022	-	-
KYUSt_chr2.53492	7bf0de3f765a6299e7015953a6f95e0d	818	Pfam	PF06839	GRF zinc finger	27	69	1.1e-06	T	30-05-2022	IPR010666	Zinc finger, GRF-type
KYUSt_chr2.53492	7bf0de3f765a6299e7015953a6f95e0d	818	PANTHER	PTHR34835	OS07G0283600 PROTEIN-RELATED	168	775	6.8e-92	T	30-05-2022	-	-
KYUSt_chr2.53492	7bf0de3f765a6299e7015953a6f95e0d	818	MobiDBLite	mobidb-lite	consensus disorder prediction	571	592	-	T	30-05-2022	-	-
KYUSt_chr2.53492	7bf0de3f765a6299e7015953a6f95e0d	818	PANTHER	PTHR34835:SF38	-	168	775	6.8e-92	T	30-05-2022	-	-
KYUSt_chr2.53492	7bf0de3f765a6299e7015953a6f95e0d	818	MobiDBLite	mobidb-lite	consensus disorder prediction	559	595	-	T	30-05-2022	-	-
KYUSt_chr1.6309	3e2c900129083b20fab6f9bf8f19a1ee	572	MobiDBLite	mobidb-lite	consensus disorder prediction	381	483	-	T	30-05-2022	-	-
KYUSt_chr1.6309	3e2c900129083b20fab6f9bf8f19a1ee	572	SUPERFAMILY	SSF54768	dsRNA-binding domain-like	96	175	2.83e-20	T	30-05-2022	-	-
KYUSt_chr1.6309	3e2c900129083b20fab6f9bf8f19a1ee	572	Gene3D	G3DSA:3.30.160.20	-	89	162	6.6e-24	T	30-05-2022	-	-
KYUSt_chr1.6309	3e2c900129083b20fab6f9bf8f19a1ee	572	Pfam	PF00035	Double-stranded RNA binding motif	96	161	1e-16	T	30-05-2022	IPR014720	Double-stranded RNA-binding domain
KYUSt_chr1.6309	3e2c900129083b20fab6f9bf8f19a1ee	572	PANTHER	PTHR46031	-	90	572	1.3e-210	T	30-05-2022	-	-
KYUSt_chr1.6309	3e2c900129083b20fab6f9bf8f19a1ee	572	CDD	cd19908	DSRM_AtDRB-like_rpt2	94	162	9.29964e-37	T	30-05-2022	IPR044451	AtDRB-like, second double-stranded RNA binding domain, plant
KYUSt_chr1.6309	3e2c900129083b20fab6f9bf8f19a1ee	572	PANTHER	PTHR46031:SF2	DOUBLE-STRANDED RNA-BINDING PROTEIN 2	90	572	1.3e-210	T	30-05-2022	-	-
KYUSt_chr1.6309	3e2c900129083b20fab6f9bf8f19a1ee	572	MobiDBLite	mobidb-lite	consensus disorder prediction	167	186	-	T	30-05-2022	-	-
KYUSt_chr1.6309	3e2c900129083b20fab6f9bf8f19a1ee	572	MobiDBLite	mobidb-lite	consensus disorder prediction	381	415	-	T	30-05-2022	-	-
KYUSt_chr1.6309	3e2c900129083b20fab6f9bf8f19a1ee	572	SMART	SM00358	DRBM_3	96	162	4e-20	T	30-05-2022	IPR014720	Double-stranded RNA-binding domain
KYUSt_chr1.6309	3e2c900129083b20fab6f9bf8f19a1ee	572	MobiDBLite	mobidb-lite	consensus disorder prediction	201	216	-	T	30-05-2022	-	-
KYUSt_chr1.6309	3e2c900129083b20fab6f9bf8f19a1ee	572	MobiDBLite	mobidb-lite	consensus disorder prediction	416	430	-	T	30-05-2022	-	-
KYUSt_chr1.6309	3e2c900129083b20fab6f9bf8f19a1ee	572	MobiDBLite	mobidb-lite	consensus disorder prediction	444	483	-	T	30-05-2022	-	-
KYUSt_chr1.6309	3e2c900129083b20fab6f9bf8f19a1ee	572	MobiDBLite	mobidb-lite	consensus disorder prediction	523	572	-	T	30-05-2022	-	-
KYUSt_chr1.6309	3e2c900129083b20fab6f9bf8f19a1ee	572	MobiDBLite	mobidb-lite	consensus disorder prediction	197	236	-	T	30-05-2022	-	-
KYUSt_chr1.6309	3e2c900129083b20fab6f9bf8f19a1ee	572	ProSiteProfiles	PS50137	Double stranded RNA-binding domain (dsRBD) profile.	95	163	13.8347	T	30-05-2022	IPR014720	Double-stranded RNA-binding domain
ZDUF_4	48ae61ae722ef414e1445f821828f5b7	529	PANTHER	PTHR31549	PROTEIN, PUTATIVE (DUF247)-RELATED-RELATED	12	521	9.8e-165	T	30-05-2022	IPR004158	Protein of unknown function DUF247, plant
ZDUF_4	48ae61ae722ef414e1445f821828f5b7	529	Pfam	PF03140	Plant protein of unknown function	44	512	4.5e-114	T	30-05-2022	IPR004158	Protein of unknown function DUF247, plant
ZDUF_4	48ae61ae722ef414e1445f821828f5b7	529	PANTHER	PTHR31549:SF211	-	12	521	9.8e-165	T	30-05-2022	-	-
KYUSt_chr1.6209	989d86281070f3d6711dd89620ddfd00	1677	SUPERFAMILY	SSF52540	P-loop containing nucleoside triphosphate hydrolases	277	566	1.58e-62	T	30-05-2022	IPR027417	P-loop containing nucleoside triphosphate hydrolase
KYUSt_chr1.6209	989d86281070f3d6711dd89620ddfd00	1677	Gene3D	G3DSA:1.10.8.430	-	466	556	1.7e-10	T	30-05-2022	IPR042197	Apoptotic protease-activating factors, helical domain
KYUSt_chr1.6209	989d86281070f3d6711dd89620ddfd00	1677	Pfam	PF00931	NB-ARC domain	316	553	5.3e-47	T	30-05-2022	IPR002182	NB-ARC
KYUSt_chr1.6209	989d86281070f3d6711dd89620ddfd00	1677	Gene3D	G3DSA:1.10.10.10	-	558	639	3.9e-05	T	30-05-2022	IPR036388	Winged helix-like DNA-binding domain superfamily
KYUSt_chr1.6209	989d86281070f3d6711dd89620ddfd00	1677	Gene3D	G3DSA:3.80.10.10	Ribonuclease Inhibitor	683	837	1.1e-08	T	30-05-2022	IPR032675	Leucine-rich repeat domain superfamily
KYUSt_chr1.6209	989d86281070f3d6711dd89620ddfd00	1677	Gene3D	G3DSA:3.80.10.10	Ribonuclease Inhibitor	838	1072	2.5e-13	T	30-05-2022	IPR032675	Leucine-rich repeat domain superfamily
KYUSt_chr1.6209	989d86281070f3d6711dd89620ddfd00	1677	PANTHER	PTHR23155	DISEASE RESISTANCE PROTEIN RP	10	1073	6.4e-219	T	30-05-2022	IPR044974	Disease resistance protein, plants
KYUSt_chr1.6209	989d86281070f3d6711dd89620ddfd00	1677	PANTHER	PTHR23155	DISEASE RESISTANCE PROTEIN RP	1109	1488	6.4e-219	T	30-05-2022	IPR044974	Disease resistance protein, plants
KYUSt_chr1.6209	989d86281070f3d6711dd89620ddfd00	1677	Gene3D	G3DSA:3.80.10.10	Ribonuclease Inhibitor	1076	1321	4.2e-06	T	30-05-2022	IPR032675	Leucine-rich repeat domain superfamily
KYUSt_chr1.6209	989d86281070f3d6711dd89620ddfd00	1677	Gene3D	G3DSA:3.40.50.300	-	281	462	3.1e-35	T	30-05-2022	IPR027417	P-loop containing nucleoside triphosphate hydrolase
KYUSt_chr1.6209	989d86281070f3d6711dd89620ddfd00	1677	SUPERFAMILY	SSF52058	L domain-like	628	1554	3.74e-24	T	30-05-2022	-	-
KYUSt_chr1.6209	989d86281070f3d6711dd89620ddfd00	1677	PANTHER	PTHR23155:SF1026	OS01G0112800 PROTEIN	10	1073	6.4e-219	T	30-05-2022	-	-
KYUSt_chr1.6209	989d86281070f3d6711dd89620ddfd00	1677	PANTHER	PTHR23155:SF1026	OS01G0112800 PROTEIN	1109	1488	6.4e-219	T	30-05-2022	-	-
KYUSt_chr1.6209	989d86281070f3d6711dd89620ddfd00	1677	SUPERFAMILY	SSF52047	RNI-like	1101	1377	1.49e-09	T	30-05-2022	-	-
KYUSt_chr1.6209	989d86281070f3d6711dd89620ddfd00	1677	Gene3D	G3DSA:3.80.10.10	Ribonuclease Inhibitor	1410	1623	1.2e-18	T	30-05-2022	IPR032675	Leucine-rich repeat domain superfamily
KYUSt_chr1.6209	989d86281070f3d6711dd89620ddfd00	1677	Pfam	PF18052	Rx N-terminal domain	17	99	3.2e-07	T	30-05-2022	IPR041118	Rx, N-terminal
KYUSt_chr1.6209	989d86281070f3d6711dd89620ddfd00	1677	Coils	Coil	Coil	1223	1243	-	T	30-05-2022	-	-
KYUSt_chr1.6209	989d86281070f3d6711dd89620ddfd00	1677	PRINTS	PR00364	Disease resistance protein signature	321	336	2.2e-15	T	30-05-2022	-	-
KYUSt_chr1.6209	989d86281070f3d6711dd89620ddfd00	1677	PRINTS	PR00364	Disease resistance protein signature	503	517	2.2e-15	T	30-05-2022	-	-
KYUSt_chr1.6209	989d86281070f3d6711dd89620ddfd00	1677	PRINTS	PR00364	Disease resistance protein signature	1130	1146	2.2e-15	T	30-05-2022	-	-
KYUSt_chr1.6209	989d86281070f3d6711dd89620ddfd00	1677	PRINTS	PR00364	Disease resistance protein signature	402	416	2.2e-15	T	30-05-2022	-	-
KYUSt_chr1.6209	989d86281070f3d6711dd89620ddfd00	1677	CDD	cd00009	AAA	324	446	0.00545392	T	30-05-2022	-	-
KYUSt_chr1.6328	18fa887658584dbaf94c40198d8977f9	417	PANTHER	PTHR33110:SF99	-	13	405	4.1e-82	T	30-05-2022	-	-
KYUSt_chr1.6328	18fa887658584dbaf94c40198d8977f9	417	PANTHER	PTHR33110	F-BOX/KELCH-REPEAT PROTEIN-RELATED	13	405	4.1e-82	T	30-05-2022	-	-
KYUSt_chr2.53352	bda2434dbd76b0f1bd47d29eca82c4d7	812	Pfam	PF01535	PPR repeat	158	187	0.0011	T	30-05-2022	IPR002885	Pentatricopeptide repeat
KYUSt_chr2.53352	bda2434dbd76b0f1bd47d29eca82c4d7	812	ProSiteProfiles	PS51375	Pentatricopeptide (PPR) repeat profile.	437	471	13.0111	T	30-05-2022	IPR002885	Pentatricopeptide repeat
KYUSt_chr2.53352	bda2434dbd76b0f1bd47d29eca82c4d7	812	Pfam	PF13812	Pentatricopeptide repeat domain	331	378	7.6e-10	T	30-05-2022	IPR002885	Pentatricopeptide repeat
KYUSt_chr2.53352	bda2434dbd76b0f1bd47d29eca82c4d7	812	Pfam	PF13812	Pentatricopeptide repeat domain	390	449	1.3e-16	T	30-05-2022	IPR002885	Pentatricopeptide repeat
KYUSt_chr2.53352	bda2434dbd76b0f1bd47d29eca82c4d7	812	Pfam	PF13812	Pentatricopeptide repeat domain	459	497	0.0067	T	30-05-2022	IPR002885	Pentatricopeptide repeat
KYUSt_chr2.53352	bda2434dbd76b0f1bd47d29eca82c4d7	812	Pfam	PF13041	PPR repeat family	580	623	3.7e-11	T	30-05-2022	IPR002885	Pentatricopeptide repeat
KYUSt_chr2.53352	bda2434dbd76b0f1bd47d29eca82c4d7	812	Pfam	PF13041	PPR repeat family	507	555	1.8e-13	T	30-05-2022	IPR002885	Pentatricopeptide repeat
KYUSt_chr2.53352	bda2434dbd76b0f1bd47d29eca82c4d7	812	ProSiteProfiles	PS51375	Pentatricopeptide (PPR) repeat profile.	190	224	10.4681	T	30-05-2022	IPR002885	Pentatricopeptide repeat
KYUSt_chr2.53352	bda2434dbd76b0f1bd47d29eca82c4d7	812	ProSiteProfiles	PS51375	Pentatricopeptide (PPR) repeat profile.	295	329	9.77754	T	30-05-2022	IPR002885	Pentatricopeptide repeat
KYUSt_chr2.53352	bda2434dbd76b0f1bd47d29eca82c4d7	812	SUPERFAMILY	SSF48452	TPR-like	197	602	1.97e-09	T	30-05-2022	IPR011990	Tetratricopeptide-like helical domain superfamily
KYUSt_chr2.53352	bda2434dbd76b0f1bd47d29eca82c4d7	812	ProSiteProfiles	PS51375	Pentatricopeptide (PPR) repeat profile.	155	189	8.90063	T	30-05-2022	IPR002885	Pentatricopeptide repeat
KYUSt_chr2.53352	bda2434dbd76b0f1bd47d29eca82c4d7	812	ProSiteProfiles	PS51375	Pentatricopeptide (PPR) repeat profile.	507	541	9.97484	T	30-05-2022	IPR002885	Pentatricopeptide repeat
KYUSt_chr2.53352	bda2434dbd76b0f1bd47d29eca82c4d7	812	Gene3D	G3DSA:1.25.40.10	Tetratricopeptide repeat domain	488	691	5.7e-36	T	30-05-2022	IPR011990	Tetratricopeptide-like helical domain superfamily
KYUSt_chr2.53352	bda2434dbd76b0f1bd47d29eca82c4d7	812	ProSiteProfiles	PS51375	Pentatricopeptide (PPR) repeat profile.	260	294	8.63756	T	30-05-2022	IPR002885	Pentatricopeptide repeat
KYUSt_chr2.53352	bda2434dbd76b0f1bd47d29eca82c4d7	812	PANTHER	PTHR47938	RESPIRATORY COMPLEX I CHAPERONE (CIA84), PUTATIVE (AFU_ORTHOLOGUE AFUA_2G06020)-RELATED	52	628	2.4e-260	T	30-05-2022	-	-
KYUSt_chr2.53352	bda2434dbd76b0f1bd47d29eca82c4d7	812	PANTHER	PTHR47938:SF5	OS07G0213300 PROTEIN	52	628	2.4e-260	T	30-05-2022	-	-
KYUSt_chr2.53352	bda2434dbd76b0f1bd47d29eca82c4d7	812	Gene3D	G3DSA:1.25.40.10	Tetratricopeptide repeat domain	90	238	3.4e-28	T	30-05-2022	IPR011990	Tetratricopeptide-like helical domain superfamily
KYUSt_chr2.53352	bda2434dbd76b0f1bd47d29eca82c4d7	812	Gene3D	G3DSA:1.25.40.10	Tetratricopeptide repeat domain	394	487	7.1e-34	T	30-05-2022	IPR011990	Tetratricopeptide-like helical domain superfamily
KYUSt_chr2.53352	bda2434dbd76b0f1bd47d29eca82c4d7	812	ProSiteProfiles	PS51375	Pentatricopeptide (PPR) repeat profile.	402	436	14.2826	T	30-05-2022	IPR002885	Pentatricopeptide repeat
KYUSt_chr2.53352	bda2434dbd76b0f1bd47d29eca82c4d7	812	ProSiteProfiles	PS51375	Pentatricopeptide (PPR) repeat profile.	225	259	11.3779	T	30-05-2022	IPR002885	Pentatricopeptide repeat
KYUSt_chr2.53352	bda2434dbd76b0f1bd47d29eca82c4d7	812	MobiDBLite	mobidb-lite	consensus disorder prediction	1	42	-	T	30-05-2022	-	-
KYUSt_chr2.53352	bda2434dbd76b0f1bd47d29eca82c4d7	812	MobiDBLite	mobidb-lite	consensus disorder prediction	1	55	-	T	30-05-2022	-	-
KYUSt_chr2.53352	bda2434dbd76b0f1bd47d29eca82c4d7	812	ProSiteProfiles	PS51375	Pentatricopeptide (PPR) repeat profile.	332	366	11.5313	T	30-05-2022	IPR002885	Pentatricopeptide repeat
KYUSt_chr2.53352	bda2434dbd76b0f1bd47d29eca82c4d7	812	Gene3D	G3DSA:1.25.40.10	Tetratricopeptide repeat domain	274	393	4.8e-34	T	30-05-2022	IPR011990	Tetratricopeptide-like helical domain superfamily
KYUSt_chr2.53352	bda2434dbd76b0f1bd47d29eca82c4d7	812	ProSiteProfiles	PS51375	Pentatricopeptide (PPR) repeat profile.	577	611	11.641	T	30-05-2022	IPR002885	Pentatricopeptide repeat
KYUSt_chr2.53352	bda2434dbd76b0f1bd47d29eca82c4d7	812	Pfam	PF14111	Domain of unknown function (DUF4283)	643	783	2.6e-19	T	30-05-2022	IPR025558	Domain of unknown function DUF4283
KYUSt_chr2.53352	bda2434dbd76b0f1bd47d29eca82c4d7	812	TIGRFAM	TIGR00756	PPR: pentatricopeptide repeat domain	262	296	0.0011	T	30-05-2022	IPR002885	Pentatricopeptide repeat
KYUSt_chr2.53352	bda2434dbd76b0f1bd47d29eca82c4d7	812	TIGRFAM	TIGR00756	PPR: pentatricopeptide repeat domain	158	191	8.5e-06	T	30-05-2022	IPR002885	Pentatricopeptide repeat
KYUSt_chr2.53352	bda2434dbd76b0f1bd47d29eca82c4d7	812	TIGRFAM	TIGR00756	PPR: pentatricopeptide repeat domain	439	473	8.1e-10	T	30-05-2022	IPR002885	Pentatricopeptide repeat
KYUSt_chr2.53352	bda2434dbd76b0f1bd47d29eca82c4d7	812	TIGRFAM	TIGR00756	PPR: pentatricopeptide repeat domain	580	613	2e-09	T	30-05-2022	IPR002885	Pentatricopeptide repeat
KYUSt_chr2.53352	bda2434dbd76b0f1bd47d29eca82c4d7	812	TIGRFAM	TIGR00756	PPR: pentatricopeptide repeat domain	509	542	0.00046	T	30-05-2022	IPR002885	Pentatricopeptide repeat
KYUSt_chr2.53352	bda2434dbd76b0f1bd47d29eca82c4d7	812	TIGRFAM	TIGR00756	PPR: pentatricopeptide repeat domain	404	437	4.5e-12	T	30-05-2022	IPR002885	Pentatricopeptide repeat
KYUSt_chr2.53352	bda2434dbd76b0f1bd47d29eca82c4d7	812	TIGRFAM	TIGR00756	PPR: pentatricopeptide repeat domain	369	403	9.3e-08	T	30-05-2022	IPR002885	Pentatricopeptide repeat
KYUSt_chr2.53352	bda2434dbd76b0f1bd47d29eca82c4d7	812	TIGRFAM	TIGR00756	PPR: pentatricopeptide repeat domain	544	575	8.1e-08	T	30-05-2022	IPR002885	Pentatricopeptide repeat
KYUSt_chr2.53352	bda2434dbd76b0f1bd47d29eca82c4d7	812	TIGRFAM	TIGR00756	PPR: pentatricopeptide repeat domain	228	260	4.4e-07	T	30-05-2022	IPR002885	Pentatricopeptide repeat
KYUSt_chr2.53352	bda2434dbd76b0f1bd47d29eca82c4d7	812	TIGRFAM	TIGR00756	PPR: pentatricopeptide repeat domain	297	325	7.2e-06	T	30-05-2022	IPR002885	Pentatricopeptide repeat
KYUSt_chr2.53352	bda2434dbd76b0f1bd47d29eca82c4d7	812	TIGRFAM	TIGR00756	PPR: pentatricopeptide repeat domain	193	225	0.00021	T	30-05-2022	IPR002885	Pentatricopeptide repeat
KYUSt_chr2.53352	bda2434dbd76b0f1bd47d29eca82c4d7	812	TIGRFAM	TIGR00756	PPR: pentatricopeptide repeat domain	334	368	2.3e-06	T	30-05-2022	IPR002885	Pentatricopeptide repeat
KYUSt_chr2.53352	bda2434dbd76b0f1bd47d29eca82c4d7	812	Pfam	PF17177	Pentacotripeptide-repeat region of PRORP	208	325	4.9e-09	T	30-05-2022	IPR033443	Pentacotripeptide-repeat region of PRORP
KYUSt_chr2.53352	bda2434dbd76b0f1bd47d29eca82c4d7	812	ProSiteProfiles	PS51375	Pentatricopeptide (PPR) repeat profile.	542	576	12.474	T	30-05-2022	IPR002885	Pentatricopeptide repeat
KYUSt_chr2.53352	bda2434dbd76b0f1bd47d29eca82c4d7	812	ProSiteProfiles	PS51375	Pentatricopeptide (PPR) repeat profile.	367	401	12.5069	T	30-05-2022	IPR002885	Pentatricopeptide repeat
KYUSt_chr2.53350	eb46c024672aa5a2cbe23833983d19b5	398	PANTHER	PTHR23051	SOLUTE CARRIER FAMILY 35, MEMBER F5	5	396	5.8e-183	T	30-05-2022	-	-
KYUSt_chr2.53350	eb46c024672aa5a2cbe23833983d19b5	398	Pfam	PF00892	EamA-like transporter family	140	219	4.1e-08	T	30-05-2022	IPR000620	EamA domain
KYUSt_chr2.53350	eb46c024672aa5a2cbe23833983d19b5	398	PANTHER	PTHR23051:SF12	OSJNBA0070O11.5 PROTEIN	5	396	5.8e-183	T	30-05-2022	-	-
KYUSt_chr2.53350	eb46c024672aa5a2cbe23833983d19b5	398	SUPERFAMILY	SSF103481	Multidrug resistance efflux transporter EmrE	145	222	6.15e-07	T	30-05-2022	-	-
KYUSt_chr2.53350	eb46c024672aa5a2cbe23833983d19b5	398	SUPERFAMILY	SSF103481	Multidrug resistance efflux transporter EmrE	282	391	1.57e-05	T	30-05-2022	-	-
KYUSt_chr1.6323	b3371037e6f0589b9aba580ac2a10e4d	848	Gene3D	G3DSA:3.40.50.300	-	475	589	1.1e-31	T	30-05-2022	IPR027417	P-loop containing nucleoside triphosphate hydrolase
KYUSt_chr1.6323	b3371037e6f0589b9aba580ac2a10e4d	848	MobiDBLite	mobidb-lite	consensus disorder prediction	398	422	-	T	30-05-2022	-	-
KYUSt_chr1.6323	b3371037e6f0589b9aba580ac2a10e4d	848	Pfam	PF16124	RecQ zinc-binding	601	651	1.4e-09	T	30-05-2022	IPR032284	ATP-dependent DNA helicase RecQ, zinc-binding domain
KYUSt_chr1.6323	b3371037e6f0589b9aba580ac2a10e4d	848	Pfam	PF00271	Helicase conserved C-terminal domain	484	579	6.6e-16	T	30-05-2022	IPR001650	Helicase, C-terminal
KYUSt_chr1.6323	b3371037e6f0589b9aba580ac2a10e4d	848	SUPERFAMILY	SSF52540	P-loop containing nucleoside triphosphate hydrolases	201	590	2.08e-45	T	30-05-2022	IPR027417	P-loop containing nucleoside triphosphate hydrolase
KYUSt_chr1.6323	b3371037e6f0589b9aba580ac2a10e4d	848	Gene3D	G3DSA:3.40.50.300	-	122	353	1.1e-71	T	30-05-2022	IPR027417	P-loop containing nucleoside triphosphate hydrolase
KYUSt_chr1.6323	b3371037e6f0589b9aba580ac2a10e4d	848	PANTHER	PTHR13710	DNA HELICASE RECQ FAMILY MEMBER	7	835	0	T	30-05-2022	-	-
KYUSt_chr1.6323	b3371037e6f0589b9aba580ac2a10e4d	848	MobiDBLite	mobidb-lite	consensus disorder prediction	59	75	-	T	30-05-2022	-	-
KYUSt_chr1.6323	b3371037e6f0589b9aba580ac2a10e4d	848	SMART	SM00490	helicmild6	499	580	1.2e-21	T	30-05-2022	IPR001650	Helicase, C-terminal
KYUSt_chr1.6323	b3371037e6f0589b9aba580ac2a10e4d	848	SMART	SM00487	ultradead3	157	362	6.3e-27	T	30-05-2022	IPR014001	Helicase superfamily 1/2, ATP-binding domain
KYUSt_chr1.6323	b3371037e6f0589b9aba580ac2a10e4d	848	MobiDBLite	mobidb-lite	consensus disorder prediction	50	78	-	T	30-05-2022	-	-
KYUSt_chr1.6323	b3371037e6f0589b9aba580ac2a10e4d	848	MobiDBLite	mobidb-lite	consensus disorder prediction	807	848	-	T	30-05-2022	-	-
KYUSt_chr1.6323	b3371037e6f0589b9aba580ac2a10e4d	848	PANTHER	PTHR13710:SF69	ATP-DEPENDENT DNA HELICASE Q-LIKE SIM	7	835	0	T	30-05-2022	-	-
KYUSt_chr1.6323	b3371037e6f0589b9aba580ac2a10e4d	848	CDD	cd17920	DEXHc_RecQ	150	352	8.82896e-84	T	30-05-2022	-	-
KYUSt_chr1.6323	b3371037e6f0589b9aba580ac2a10e4d	848	MobiDBLite	mobidb-lite	consensus disorder prediction	811	825	-	T	30-05-2022	-	-
KYUSt_chr1.6323	b3371037e6f0589b9aba580ac2a10e4d	848	Pfam	PF00270	DEAD/DEAH box helicase	164	332	6.5e-18	T	30-05-2022	IPR011545	DEAD/DEAH box helicase domain
KYUSt_chr1.6323	b3371037e6f0589b9aba580ac2a10e4d	848	TIGRFAM	TIGR00614	recQ_fam: ATP-dependent DNA helicase, RecQ family	151	380	6.9e-71	T	30-05-2022	IPR004589	DNA helicase, ATP-dependent, RecQ type
KYUSt_chr1.6323	b3371037e6f0589b9aba580ac2a10e4d	848	Gene3D	G3DSA:1.10.10.10	-	593	758	6.5e-20	T	30-05-2022	IPR036388	Winged helix-like DNA-binding domain superfamily
KYUSt_chr1.6323	b3371037e6f0589b9aba580ac2a10e4d	848	ProSiteProfiles	PS51192	Superfamilies 1 and 2 helicase ATP-binding type-1 domain profile.	169	345	21.5057	T	30-05-2022	IPR014001	Helicase superfamily 1/2, ATP-binding domain
KYUSt_chr1.6323	b3371037e6f0589b9aba580ac2a10e4d	848	MobiDBLite	mobidb-lite	consensus disorder prediction	405	420	-	T	30-05-2022	-	-
KYUSt_chr1.6323	b3371037e6f0589b9aba580ac2a10e4d	848	ProSiteProfiles	PS50030	Ubiquitin-associated domain (UBA) profile.	9	50	8.54678	T	30-05-2022	IPR015940	Ubiquitin-associated domain
KYUSt_chr1.6323	b3371037e6f0589b9aba580ac2a10e4d	848	ProSiteProfiles	PS51194	Superfamilies 1 and 2 helicase C-terminal domain profile.	474	637	15.2892	T	30-05-2022	IPR001650	Helicase, C-terminal
KYUSt_chr2.53355	c6f88ed7576ac2762ac66b52cb74be47	256	MobiDBLite	mobidb-lite	consensus disorder prediction	29	56	-	T	30-05-2022	-	-
KYUSt_chr2.53355	c6f88ed7576ac2762ac66b52cb74be47	256	MobiDBLite	mobidb-lite	consensus disorder prediction	1	65	-	T	30-05-2022	-	-
KYUSt_chr2.53355	c6f88ed7576ac2762ac66b52cb74be47	256	PANTHER	PTHR47482:SF5	AP COMPLEX SUBUNIT SIGMA	89	205	9.5e-60	T	30-05-2022	-	-
KYUSt_chr2.53355	c6f88ed7576ac2762ac66b52cb74be47	256	PANTHER	PTHR47482	OS11G0632001 PROTEIN	89	205	9.5e-60	T	30-05-2022	-	-
KYUSt_chr2.53294	818042ed6d04ea27c8d1ff1f40169653	490	MobiDBLite	mobidb-lite	consensus disorder prediction	105	122	-	T	30-05-2022	-	-
KYUSt_chr2.53294	818042ed6d04ea27c8d1ff1f40169653	490	Coils	Coil	Coil	354	374	-	T	30-05-2022	-	-
KYUSt_chr2.53294	818042ed6d04ea27c8d1ff1f40169653	490	MobiDBLite	mobidb-lite	consensus disorder prediction	359	374	-	T	30-05-2022	-	-
KYUSt_chr2.53294	818042ed6d04ea27c8d1ff1f40169653	490	MobiDBLite	mobidb-lite	consensus disorder prediction	67	81	-	T	30-05-2022	-	-
KYUSt_chr2.53294	818042ed6d04ea27c8d1ff1f40169653	490	MobiDBLite	mobidb-lite	consensus disorder prediction	156	171	-	T	30-05-2022	-	-
KYUSt_chr2.53294	818042ed6d04ea27c8d1ff1f40169653	490	MobiDBLite	mobidb-lite	consensus disorder prediction	310	333	-	T	30-05-2022	-	-
KYUSt_chr2.53294	818042ed6d04ea27c8d1ff1f40169653	490	Gene3D	G3DSA:3.40.50.10130	-	423	485	2.3e-08	T	30-05-2022	-	-
KYUSt_chr2.53294	818042ed6d04ea27c8d1ff1f40169653	490	MobiDBLite	mobidb-lite	consensus disorder prediction	354	374	-	T	30-05-2022	-	-
KYUSt_chr2.53294	818042ed6d04ea27c8d1ff1f40169653	490	Coils	Coil	Coil	380	417	-	T	30-05-2022	-	-
KYUSt_chr2.53294	818042ed6d04ea27c8d1ff1f40169653	490	MobiDBLite	mobidb-lite	consensus disorder prediction	32	50	-	T	30-05-2022	-	-
KYUSt_chr2.53294	818042ed6d04ea27c8d1ff1f40169653	490	MobiDBLite	mobidb-lite	consensus disorder prediction	16	172	-	T	30-05-2022	-	-
KYUSt_chr2.53294	818042ed6d04ea27c8d1ff1f40169653	490	PANTHER	PTHR21077:SF8	-	320	474	5.4e-52	T	30-05-2022	-	-
KYUSt_chr2.53294	818042ed6d04ea27c8d1ff1f40169653	490	PANTHER	PTHR21077	EME1 PROTEIN	320	474	5.4e-52	T	30-05-2022	IPR033310	Mms4/EME1/EME2
KYUSt_chr2.53469	32f5f0e36ba0b80db6ca4abaedcbe829	216	ProSiteProfiles	PS51257	Prokaryotic membrane lipoprotein lipid attachment site profile.	1	26	5	T	30-05-2022	-	-
KYUSt_chr2.53310	331de495b3bbcd2aa7ac6548c6d423bc	770	SUPERFAMILY	SSF57850	RING/U-box	231	278	8.83e-06	T	30-05-2022	-	-
KYUSt_chr2.53310	331de495b3bbcd2aa7ac6548c6d423bc	770	Coils	Coil	Coil	432	452	-	T	30-05-2022	-	-
KYUSt_chr2.53310	331de495b3bbcd2aa7ac6548c6d423bc	770	Coils	Coil	Coil	396	416	-	T	30-05-2022	-	-
KYUSt_chr2.53310	331de495b3bbcd2aa7ac6548c6d423bc	770	PANTHER	PTHR24007	BRCA1-ASSOCIATED PROTEIN	1	530	1e-224	T	30-05-2022	-	-
KYUSt_chr2.53310	331de495b3bbcd2aa7ac6548c6d423bc	770	Pfam	PF02148	Zn-finger in ubiquitin-hydrolases and other protein	288	347	3.3e-19	T	30-05-2022	IPR001607	Zinc finger, UBP-type
KYUSt_chr2.53310	331de495b3bbcd2aa7ac6548c6d423bc	770	Gene3D	G3DSA:3.30.40.10	Zinc/RING finger domain, C3HC4 (zinc finger)	227	269	4.2e-06	T	30-05-2022	IPR013083	Zinc finger, RING/FYVE/PHD-type
KYUSt_chr2.53310	331de495b3bbcd2aa7ac6548c6d423bc	770	SMART	SM00290	Zf_UBP_1	287	336	3.5e-25	T	30-05-2022	IPR001607	Zinc finger, UBP-type
KYUSt_chr2.53310	331de495b3bbcd2aa7ac6548c6d423bc	770	CDD	cd16457	RING-H2_BRAP2	232	273	1.71476e-17	T	30-05-2022	-	-
KYUSt_chr2.53310	331de495b3bbcd2aa7ac6548c6d423bc	770	ProSiteProfiles	PS50089	Zinc finger RING-type profile.	234	274	11.6926	T	30-05-2022	IPR001841	Zinc finger, RING-type
KYUSt_chr2.53310	331de495b3bbcd2aa7ac6548c6d423bc	770	SUPERFAMILY	SSF57850	RING/U-box	251	352	7.07e-23	T	30-05-2022	-	-
KYUSt_chr2.53310	331de495b3bbcd2aa7ac6548c6d423bc	770	Gene3D	G3DSA:3.30.40.10	Zinc/RING finger domain, C3HC4 (zinc finger)	270	365	1.2e-16	T	30-05-2022	IPR013083	Zinc finger, RING/FYVE/PHD-type
KYUSt_chr2.53310	331de495b3bbcd2aa7ac6548c6d423bc	770	CDD	cd12437	RRM_BRAP2_like	136	217	1.0827e-27	T	30-05-2022	-	-
KYUSt_chr2.53310	331de495b3bbcd2aa7ac6548c6d423bc	770	Pfam	PF13966	zinc-binding in reverse transcriptase	586	670	8.4e-27	T	30-05-2022	IPR026960	Reverse transcriptase zinc-binding domain
KYUSt_chr2.53310	331de495b3bbcd2aa7ac6548c6d423bc	770	ProSiteProfiles	PS50271	Zinc finger UBP-type profile.	286	347	19.5921	T	30-05-2022	IPR001607	Zinc finger, UBP-type
KYUSt_chr2.53310	331de495b3bbcd2aa7ac6548c6d423bc	770	PANTHER	PTHR24007:SF10	BRAP2 RING ZNF UBP DOMAIN-CONTAINING PROTEIN 1	1	530	1e-224	T	30-05-2022	IPR033273	RING domain containing protein BRIZ1/BRIZ2
KYUSt_chr2.53310	331de495b3bbcd2aa7ac6548c6d423bc	770	Pfam	PF07576	BRCA1-associated protein 2	129	221	3.8e-30	T	30-05-2022	IPR011422	BRCA1-associated 2
KYUSt_chr2.53310	331de495b3bbcd2aa7ac6548c6d423bc	770	MobiDBLite	mobidb-lite	consensus disorder prediction	26	63	-	T	30-05-2022	-	-
KYUSt_chr2.53310	331de495b3bbcd2aa7ac6548c6d423bc	770	MobiDBLite	mobidb-lite	consensus disorder prediction	24	77	-	T	30-05-2022	-	-
KYUSt_chr2.53310	331de495b3bbcd2aa7ac6548c6d423bc	770	SMART	SM00184	ring_2	234	273	0.00034	T	30-05-2022	IPR001841	Zinc finger, RING-type
KYUSt_chr2.53295	5ada205066e4e0b0a02cd83e601c563e	259	MobiDBLite	mobidb-lite	consensus disorder prediction	123	149	-	T	30-05-2022	-	-
KYUSt_chr2.53295	5ada205066e4e0b0a02cd83e601c563e	259	MobiDBLite	mobidb-lite	consensus disorder prediction	167	200	-	T	30-05-2022	-	-
KYUSt_chr2.53295	5ada205066e4e0b0a02cd83e601c563e	259	MobiDBLite	mobidb-lite	consensus disorder prediction	50	73	-	T	30-05-2022	-	-
KYUSt_chr2.53371	717642c8ad2b0e48d7a962636ea5a091	1671	MobiDBLite	mobidb-lite	consensus disorder prediction	1507	1560	-	T	30-05-2022	-	-
KYUSt_chr2.53371	717642c8ad2b0e48d7a962636ea5a091	1671	MobiDBLite	mobidb-lite	consensus disorder prediction	585	605	-	T	30-05-2022	-	-
KYUSt_chr2.53371	717642c8ad2b0e48d7a962636ea5a091	1671	Pfam	PF13424	Tetratricopeptide repeat	1007	1080	1.2e-10	T	30-05-2022	-	-
KYUSt_chr2.53371	717642c8ad2b0e48d7a962636ea5a091	1671	Pfam	PF13424	Tetratricopeptide repeat	922	992	6.1e-13	T	30-05-2022	-	-
KYUSt_chr2.53371	717642c8ad2b0e48d7a962636ea5a091	1671	MobiDBLite	mobidb-lite	consensus disorder prediction	11	25	-	T	30-05-2022	-	-
KYUSt_chr2.53371	717642c8ad2b0e48d7a962636ea5a091	1671	Pfam	PF15044	Mitochondrial function, CLU-N-term	50	121	9.3e-07	T	30-05-2022	IPR028275	Clustered mitochondria protein, N-terminal
KYUSt_chr2.53371	717642c8ad2b0e48d7a962636ea5a091	1671	MobiDBLite	mobidb-lite	consensus disorder prediction	1350	1367	-	T	30-05-2022	-	-
KYUSt_chr2.53371	717642c8ad2b0e48d7a962636ea5a091	1671	SUPERFAMILY	SSF103107	Hypothetical protein c14orf129, hspc210	210	268	8.63e-05	T	30-05-2022	IPR023231	GSKIP domain superfamily
KYUSt_chr2.53371	717642c8ad2b0e48d7a962636ea5a091	1671	MobiDBLite	mobidb-lite	consensus disorder prediction	1280	1303	-	T	30-05-2022	-	-
KYUSt_chr2.53371	717642c8ad2b0e48d7a962636ea5a091	1671	ProSiteProfiles	PS51823	Clueless (Clu) domain profile.	307	591	23.1119	T	30-05-2022	IPR025697	CLU domain
KYUSt_chr2.53371	717642c8ad2b0e48d7a962636ea5a091	1671	MobiDBLite	mobidb-lite	consensus disorder prediction	1469	1487	-	T	30-05-2022	-	-
KYUSt_chr2.53371	717642c8ad2b0e48d7a962636ea5a091	1671	CDD	cd15466	CLU-central	711	853	9.65794e-42	T	30-05-2022	IPR033646	CLU central domain
KYUSt_chr2.53371	717642c8ad2b0e48d7a962636ea5a091	1671	MobiDBLite	mobidb-lite	consensus disorder prediction	619	649	-	T	30-05-2022	-	-
KYUSt_chr2.53371	717642c8ad2b0e48d7a962636ea5a091	1671	MobiDBLite	mobidb-lite	consensus disorder prediction	1469	1488	-	T	30-05-2022	-	-
KYUSt_chr2.53371	717642c8ad2b0e48d7a962636ea5a091	1671	MobiDBLite	mobidb-lite	consensus disorder prediction	1616	1645	-	T	30-05-2022	-	-
KYUSt_chr2.53371	717642c8ad2b0e48d7a962636ea5a091	1671	PANTHER	PTHR12601:SF45	TETRATRICOPEPTIDE REPEAT (TPR)-LIKE SUPERFAMILY PROTEIN	1	1668	0	T	30-05-2022	-	-
KYUSt_chr2.53371	717642c8ad2b0e48d7a962636ea5a091	1671	MobiDBLite	mobidb-lite	consensus disorder prediction	1588	1658	-	T	30-05-2022	-	-
KYUSt_chr2.53371	717642c8ad2b0e48d7a962636ea5a091	1671	Pfam	PF12807	Translation initiation factor eIF3 subunit 135	709	852	3.6e-24	T	30-05-2022	IPR033646	CLU central domain
KYUSt_chr2.53371	717642c8ad2b0e48d7a962636ea5a091	1671	MobiDBLite	mobidb-lite	consensus disorder prediction	1229	1262	-	T	30-05-2022	-	-
KYUSt_chr2.53371	717642c8ad2b0e48d7a962636ea5a091	1671	MobiDBLite	mobidb-lite	consensus disorder prediction	1507	1528	-	T	30-05-2022	-	-
KYUSt_chr2.53371	717642c8ad2b0e48d7a962636ea5a091	1671	SUPERFAMILY	SSF48452	TPR-like	960	1084	1.23e-11	T	30-05-2022	IPR011990	Tetratricopeptide-like helical domain superfamily
KYUSt_chr2.53371	717642c8ad2b0e48d7a962636ea5a091	1671	SMART	SM00028	tpr_5	965	998	81	T	30-05-2022	IPR019734	Tetratricopeptide repeat
KYUSt_chr2.53371	717642c8ad2b0e48d7a962636ea5a091	1671	SMART	SM00028	tpr_5	923	956	0.089	T	30-05-2022	IPR019734	Tetratricopeptide repeat
KYUSt_chr2.53371	717642c8ad2b0e48d7a962636ea5a091	1671	SMART	SM00028	tpr_5	1007	1040	33	T	30-05-2022	IPR019734	Tetratricopeptide repeat
KYUSt_chr2.53371	717642c8ad2b0e48d7a962636ea5a091	1671	ProSiteProfiles	PS50005	TPR repeat profile.	923	956	8.9094	T	30-05-2022	IPR019734	Tetratricopeptide repeat
KYUSt_chr2.53371	717642c8ad2b0e48d7a962636ea5a091	1671	SUPERFAMILY	SSF48452	TPR-like	890	994	3.7e-12	T	30-05-2022	IPR011990	Tetratricopeptide-like helical domain superfamily
KYUSt_chr2.53371	717642c8ad2b0e48d7a962636ea5a091	1671	Coils	Coil	Coil	607	634	-	T	30-05-2022	-	-
KYUSt_chr2.53371	717642c8ad2b0e48d7a962636ea5a091	1671	MobiDBLite	mobidb-lite	consensus disorder prediction	1278	1303	-	T	30-05-2022	-	-
KYUSt_chr2.53371	717642c8ad2b0e48d7a962636ea5a091	1671	MobiDBLite	mobidb-lite	consensus disorder prediction	129	164	-	T	30-05-2022	-	-
KYUSt_chr2.53371	717642c8ad2b0e48d7a962636ea5a091	1671	MobiDBLite	mobidb-lite	consensus disorder prediction	581	605	-	T	30-05-2022	-	-
KYUSt_chr2.53371	717642c8ad2b0e48d7a962636ea5a091	1671	MobiDBLite	mobidb-lite	consensus disorder prediction	1328	1408	-	T	30-05-2022	-	-
KYUSt_chr2.53371	717642c8ad2b0e48d7a962636ea5a091	1671	MobiDBLite	mobidb-lite	consensus disorder prediction	1109	1144	-	T	30-05-2022	-	-
KYUSt_chr2.53371	717642c8ad2b0e48d7a962636ea5a091	1671	MobiDBLite	mobidb-lite	consensus disorder prediction	1532	1560	-	T	30-05-2022	-	-
KYUSt_chr2.53371	717642c8ad2b0e48d7a962636ea5a091	1671	MobiDBLite	mobidb-lite	consensus disorder prediction	619	636	-	T	30-05-2022	-	-
KYUSt_chr2.53371	717642c8ad2b0e48d7a962636ea5a091	1671	MobiDBLite	mobidb-lite	consensus disorder prediction	1328	1343	-	T	30-05-2022	-	-
KYUSt_chr2.53371	717642c8ad2b0e48d7a962636ea5a091	1671	PANTHER	PTHR12601	EUKARYOTIC TRANSLATION INITIATION FACTOR 3 SUBUNIT EIF-3	1	1668	0	T	30-05-2022	IPR027523	CLU domain containing protein
KYUSt_chr2.53371	717642c8ad2b0e48d7a962636ea5a091	1671	MobiDBLite	mobidb-lite	consensus disorder prediction	1	25	-	T	30-05-2022	-	-
KYUSt_chr2.53371	717642c8ad2b0e48d7a962636ea5a091	1671	Gene3D	G3DSA:1.25.40.10	Tetratricopeptide repeat domain	882	1193	4.4e-33	T	30-05-2022	IPR011990	Tetratricopeptide-like helical domain superfamily
KYUSt_chr2.53371	717642c8ad2b0e48d7a962636ea5a091	1671	MobiDBLite	mobidb-lite	consensus disorder prediction	1368	1408	-	T	30-05-2022	-	-
KYUSt_chr1.6286	788e123c5c388d742ffc3d438564ca03	200	MobiDBLite	mobidb-lite	consensus disorder prediction	106	200	-	T	30-05-2022	-	-
KYUSt_chr2.53481	f2736d342c12fcb416cca4112ca61ca5	570	SUPERFAMILY	SSF46934	UBA-like	278	342	3.95e-10	T	30-05-2022	IPR009060	UBA-like superfamily
KYUSt_chr2.53481	f2736d342c12fcb416cca4112ca61ca5	570	Gene3D	G3DSA:1.10.8.10	-	343	417	1.1e-05	T	30-05-2022	-	-
KYUSt_chr2.53481	f2736d342c12fcb416cca4112ca61ca5	570	ProSiteProfiles	PS50030	Ubiquitin-associated domain (UBA) profile.	373	413	10.6432	T	30-05-2022	IPR015940	Ubiquitin-associated domain
KYUSt_chr2.53481	f2736d342c12fcb416cca4112ca61ca5	570	SUPERFAMILY	SSF54236	Ubiquitin-like	34	83	1.66e-05	T	30-05-2022	IPR029071	Ubiquitin-like domain superfamily
KYUSt_chr2.53481	f2736d342c12fcb416cca4112ca61ca5	570	ProSiteProfiles	PS50030	Ubiquitin-associated domain (UBA) profile.	301	341	10.7637	T	30-05-2022	IPR015940	Ubiquitin-associated domain
KYUSt_chr2.53481	f2736d342c12fcb416cca4112ca61ca5	570	Gene3D	G3DSA:3.10.20.90	-	26	84	3.3e-05	T	30-05-2022	-	-
KYUSt_chr2.53481	f2736d342c12fcb416cca4112ca61ca5	570	ProSiteProfiles	PS50053	Ubiquitin domain profile.	35	83	11.0938	T	30-05-2022	IPR000626	Ubiquitin-like domain
KYUSt_chr2.53481	f2736d342c12fcb416cca4112ca61ca5	570	Gene3D	G3DSA:1.10.8.10	-	303	342	7.8e-08	T	30-05-2022	-	-
KYUSt_chr2.53481	f2736d342c12fcb416cca4112ca61ca5	570	SMART	SM00165	uba_6	303	340	0.023	T	30-05-2022	IPR015940	Ubiquitin-associated domain
KYUSt_chr2.53481	f2736d342c12fcb416cca4112ca61ca5	570	SMART	SM00165	uba_6	375	412	0.012	T	30-05-2022	IPR015940	Ubiquitin-associated domain
KYUSt_chr2.53481	f2736d342c12fcb416cca4112ca61ca5	570	PANTHER	PTHR12948	NEDD8 ULTIMATE BUSTER-1 BS4 PROTEIN	33	568	4e-177	T	30-05-2022	IPR039749	NEDD8 ultimate buster 1
KYUSt_chr2.53481	f2736d342c12fcb416cca4112ca61ca5	570	SUPERFAMILY	SSF46934	UBA-like	364	413	2.38e-07	T	30-05-2022	IPR009060	UBA-like superfamily
KYUSt_chr2.53481	f2736d342c12fcb416cca4112ca61ca5	570	CDD	cd14291	UBA1_NUB1_like	304	338	7.41544e-05	T	30-05-2022	-	-
KYUSt_chr2.53481	f2736d342c12fcb416cca4112ca61ca5	570	MobiDBLite	mobidb-lite	consensus disorder prediction	422	460	-	T	30-05-2022	-	-
KYUSt_chr1.6316	a94bdd30d50ba0322176d87b93ffed28	586	Gene3D	G3DSA:3.80.10.10	Ribonuclease Inhibitor	52	586	3.8e-166	T	30-05-2022	IPR032675	Leucine-rich repeat domain superfamily
KYUSt_chr1.6316	a94bdd30d50ba0322176d87b93ffed28	586	SMART	SM00367	LRR_CC_2	378	402	1.6	T	30-05-2022	IPR006553	Leucine-rich repeat, cysteine-containing subtype
KYUSt_chr1.6316	a94bdd30d50ba0322176d87b93ffed28	586	SMART	SM00367	LRR_CC_2	135	160	270	T	30-05-2022	IPR006553	Leucine-rich repeat, cysteine-containing subtype
KYUSt_chr1.6316	a94bdd30d50ba0322176d87b93ffed28	586	SMART	SM00367	LRR_CC_2	110	134	510	T	30-05-2022	IPR006553	Leucine-rich repeat, cysteine-containing subtype
KYUSt_chr1.6316	a94bdd30d50ba0322176d87b93ffed28	586	SMART	SM00367	LRR_CC_2	487	511	23	T	30-05-2022	IPR006553	Leucine-rich repeat, cysteine-containing subtype
KYUSt_chr1.6316	a94bdd30d50ba0322176d87b93ffed28	586	PANTHER	PTHR16134	F-BOX/TPR REPEAT PROTEIN POF3	12	585	8.9e-280	T	30-05-2022	-	-
KYUSt_chr1.6316	a94bdd30d50ba0322176d87b93ffed28	586	PANTHER	PTHR16134:SF66	PROTEIN TRANSPORT INHIBITOR RESPONSE 1	12	585	8.9e-280	T	30-05-2022	-	-
KYUSt_chr1.6316	a94bdd30d50ba0322176d87b93ffed28	586	SUPERFAMILY	SSF81383	F-box domain	7	48	2.49e-06	T	30-05-2022	IPR036047	F-box-like domain superfamily
KYUSt_chr1.6316	a94bdd30d50ba0322176d87b93ffed28	586	Pfam	PF18791	Transport inhibitor response 1 protein domain	72	118	2.6e-19	T	30-05-2022	IPR041101	Transport inhibitor response 1 domain
KYUSt_chr1.6316	a94bdd30d50ba0322176d87b93ffed28	586	SUPERFAMILY	SSF52047	RNI-like	80	539	3.14e-33	T	30-05-2022	-	-
KYUSt_chr1.6316	a94bdd30d50ba0322176d87b93ffed28	586	Pfam	PF13516	Leucine Rich repeat	487	506	1.6	T	30-05-2022	IPR001611	Leucine-rich repeat
KYUSt_chr1.6316	a94bdd30d50ba0322176d87b93ffed28	586	Pfam	PF18511	F-box	14	52	1.2e-06	T	30-05-2022	IPR041567	COI1, F-box
KYUSt_chr1.6316	a94bdd30d50ba0322176d87b93ffed28	586	Gene3D	G3DSA:1.20.1280.50	-	11	51	1.5e-09	T	30-05-2022	-	-
KYUSt_chr2.53236	5820164212792d4fcd4c8c4d7a48aeda	162	SUPERFAMILY	SSF81383	F-box domain	94	125	6.93e-05	T	30-05-2022	IPR036047	F-box-like domain superfamily
KYUSt_chr2.53236	5820164212792d4fcd4c8c4d7a48aeda	162	Pfam	PF18511	F-box	91	128	4.2e-14	T	30-05-2022	IPR041567	COI1, F-box
KYUSt_chr2.53236	5820164212792d4fcd4c8c4d7a48aeda	162	Gene3D	G3DSA:1.20.1280.50	-	81	128	6.3e-12	T	30-05-2022	-	-
KYUSt_chr2.53236	5820164212792d4fcd4c8c4d7a48aeda	162	PANTHER	PTHR16134	F-BOX/TPR REPEAT PROTEIN POF3	79	144	7.7e-17	T	30-05-2022	-	-
KYUSt_chr2.53236	5820164212792d4fcd4c8c4d7a48aeda	162	PANTHER	PTHR16134:SF57	F-BOX PROTEIN FBX14	79	144	7.7e-17	T	30-05-2022	-	-
KYUSt_chr2.53236	5820164212792d4fcd4c8c4d7a48aeda	162	MobiDBLite	mobidb-lite	consensus disorder prediction	70	89	-	T	30-05-2022	-	-
KYUSt_chr2.53454	7a102e3b12bdb587b332661dbcfcf925	233	PANTHER	PTHR11477	TRANSCRIPTION FACTOR S-II ZINC FINGER DOMAIN-CONTAINING PROTEIN	62	104	4.4e-13	T	30-05-2022	-	-
KYUSt_chr2.53454	7a102e3b12bdb587b332661dbcfcf925	233	PANTHER	PTHR11477:SF38	OS04G0644675 PROTEIN	62	104	4.4e-13	T	30-05-2022	-	-
KYUSt_chr2.53354	ef4d774ae5e4f54ab24d05656f38cca8	308	MobiDBLite	mobidb-lite	consensus disorder prediction	234	252	-	T	30-05-2022	-	-
KYUSt_chr2.53354	ef4d774ae5e4f54ab24d05656f38cca8	308	Gene3D	G3DSA:4.10.60.10	-	232	307	3.6e-06	T	30-05-2022	-	-
KYUSt_chr2.53354	ef4d774ae5e4f54ab24d05656f38cca8	308	PANTHER	PTHR31669	PROTEIN FAR1-RELATED SEQUENCE 10-RELATED	56	190	1.2e-45	T	30-05-2022	IPR031052	FHY3/FAR1 family
KYUSt_chr2.53354	ef4d774ae5e4f54ab24d05656f38cca8	308	MobiDBLite	mobidb-lite	consensus disorder prediction	230	252	-	T	30-05-2022	-	-
KYUSt_chr2.53354	ef4d774ae5e4f54ab24d05656f38cca8	308	SUPERFAMILY	SSF57756	Retrovirus zinc finger-like domains	253	305	1.44e-05	T	30-05-2022	IPR036875	Zinc finger, CCHC-type superfamily
KYUSt_chr2.53354	ef4d774ae5e4f54ab24d05656f38cca8	308	ProSiteProfiles	PS50966	Zinc finger SWIM-type profile.	66	100	9.65589	T	30-05-2022	IPR007527	Zinc finger, SWIM-type
KYUSt_chr2.53354	ef4d774ae5e4f54ab24d05656f38cca8	308	PANTHER	PTHR31669	PROTEIN FAR1-RELATED SEQUENCE 10-RELATED	1	56	1.2e-45	T	30-05-2022	IPR031052	FHY3/FAR1 family
KYUSt_chr2.53354	ef4d774ae5e4f54ab24d05656f38cca8	308	PANTHER	PTHR31669:SF175	OS04G0354200 PROTEIN	1	56	1.2e-45	T	30-05-2022	-	-
KYUSt_chr2.53354	ef4d774ae5e4f54ab24d05656f38cca8	308	SMART	SM00575	26again6	75	102	0.0045	T	30-05-2022	IPR006564	Zinc finger, PMZ-type
KYUSt_chr2.53354	ef4d774ae5e4f54ab24d05656f38cca8	308	SMART	SM00343	c2hcfinal6	258	274	0.95	T	30-05-2022	IPR001878	Zinc finger, CCHC-type
KYUSt_chr2.53354	ef4d774ae5e4f54ab24d05656f38cca8	308	SMART	SM00343	c2hcfinal6	287	303	0.078	T	30-05-2022	IPR001878	Zinc finger, CCHC-type
KYUSt_chr2.53354	ef4d774ae5e4f54ab24d05656f38cca8	308	PANTHER	PTHR31669:SF175	OS04G0354200 PROTEIN	56	190	1.2e-45	T	30-05-2022	-	-
KYUSt_chr2.53380	c0991319f77719d2eeafde596f17b96e	570	CDD	cd00030	C2	443	543	1.76954e-24	T	30-05-2022	-	-
KYUSt_chr2.53380	c0991319f77719d2eeafde596f17b96e	570	ProSiteProfiles	PS50004	C2 domain profile.	423	541	22.2176	T	30-05-2022	IPR000008	C2 domain
KYUSt_chr2.53380	c0991319f77719d2eeafde596f17b96e	570	PANTHER	PTHR10774:SF195	SYNAPTOTAGMIN-5	1	569	0	T	30-05-2022	-	-
KYUSt_chr2.53380	c0991319f77719d2eeafde596f17b96e	570	Gene3D	G3DSA:2.60.40.150	C2 domain	426	559	4.4e-37	T	30-05-2022	IPR035892	C2 domain superfamily
KYUSt_chr2.53380	c0991319f77719d2eeafde596f17b96e	570	SUPERFAMILY	SSF49562	C2 domain (Calcium/lipid-binding domain, CaLB)	439	559	1.01e-33	T	30-05-2022	IPR035892	C2 domain superfamily
KYUSt_chr2.53380	c0991319f77719d2eeafde596f17b96e	570	PANTHER	PTHR10774	EXTENDED SYNAPTOTAGMIN-RELATED	1	569	0	T	30-05-2022	IPR045050	Synaptotagmin, plant
KYUSt_chr2.53380	c0991319f77719d2eeafde596f17b96e	570	Pfam	PF17047	Synaptotagmin-like mitochondrial-lipid-binding domain	70	248	1.3e-13	T	30-05-2022	IPR039010	Synaptotagmin, SMP domain
KYUSt_chr2.53380	c0991319f77719d2eeafde596f17b96e	570	SMART	SM00239	C2_3c	263	363	3e-24	T	30-05-2022	IPR000008	C2 domain
KYUSt_chr2.53380	c0991319f77719d2eeafde596f17b96e	570	SMART	SM00239	C2_3c	442	540	3.3e-24	T	30-05-2022	IPR000008	C2 domain
KYUSt_chr2.53380	c0991319f77719d2eeafde596f17b96e	570	SUPERFAMILY	SSF49562	C2 domain (Calcium/lipid-binding domain, CaLB)	260	392	4.41e-32	T	30-05-2022	IPR035892	C2 domain superfamily
KYUSt_chr2.53380	c0991319f77719d2eeafde596f17b96e	570	Pfam	PF00168	C2 domain	262	366	8.1e-24	T	30-05-2022	IPR000008	C2 domain
KYUSt_chr2.53380	c0991319f77719d2eeafde596f17b96e	570	Pfam	PF00168	C2 domain	441	543	1.2e-26	T	30-05-2022	IPR000008	C2 domain
KYUSt_chr2.53380	c0991319f77719d2eeafde596f17b96e	570	ProSiteProfiles	PS50004	C2 domain profile.	243	364	22.3952	T	30-05-2022	IPR000008	C2 domain
KYUSt_chr2.53380	c0991319f77719d2eeafde596f17b96e	570	ProSiteProfiles	PS51847	Synaptotagmin-like mitochondrial lipid-binding proteins (SMP) domain profile.	67	249	27.9246	T	30-05-2022	IPR031468	Synaptotagmin-like mitochondrial-lipid-binding domain
KYUSt_chr2.53380	c0991319f77719d2eeafde596f17b96e	570	Gene3D	G3DSA:2.60.40.150	C2 domain	258	399	1.6e-34	T	30-05-2022	IPR035892	C2 domain superfamily
KYUSt_chr2.53380	c0991319f77719d2eeafde596f17b96e	570	CDD	cd00030	C2	264	366	4.04894e-28	T	30-05-2022	-	-
KYUSt_chr2.53380	c0991319f77719d2eeafde596f17b96e	570	PRINTS	PR00360	C2 domain signature	458	470	5.1e-08	T	30-05-2022	IPR000008	C2 domain
KYUSt_chr2.53380	c0991319f77719d2eeafde596f17b96e	570	PRINTS	PR00360	C2 domain signature	506	514	5.1e-08	T	30-05-2022	IPR000008	C2 domain
KYUSt_chr2.53380	c0991319f77719d2eeafde596f17b96e	570	PRINTS	PR00360	C2 domain signature	484	497	5.1e-08	T	30-05-2022	IPR000008	C2 domain
KYUSt_chr2.53456	d8eb89358f6d7e280a4c05bfcb87d06e	129	Gene3D	G3DSA:1.10.110.10	-	45	129	3.2e-17	T	30-05-2022	IPR036312	Bifunctional inhibitor/plant lipid transfer protein/seed storage helical domain superfamily
KYUSt_chr2.53456	d8eb89358f6d7e280a4c05bfcb87d06e	129	Pfam	PF14547	Hydrophobic seed protein	46	128	7.8e-24	T	30-05-2022	IPR027923	Hydrophobic seed protein domain
KYUSt_chr2.53456	d8eb89358f6d7e280a4c05bfcb87d06e	129	PANTHER	PTHR31731	-	9	129	2.9e-33	T	30-05-2022	-	-
KYUSt_chr2.53456	d8eb89358f6d7e280a4c05bfcb87d06e	129	PANTHER	PTHR31731:SF19	PROLINE-RICH PROTEIN DC2.15	9	129	2.9e-33	T	30-05-2022	-	-
KYUSt_chr2.53456	d8eb89358f6d7e280a4c05bfcb87d06e	129	CDD	cd01958	HPS_like	44	128	1.42931e-23	T	30-05-2022	IPR027923	Hydrophobic seed protein domain
KYUSt_chr2.53456	d8eb89358f6d7e280a4c05bfcb87d06e	129	SUPERFAMILY	SSF47699	Bifunctional inhibitor/lipid-transfer protein/seed storage 2S albumin	49	128	4.86e-16	T	30-05-2022	IPR036312	Bifunctional inhibitor/plant lipid transfer protein/seed storage helical domain superfamily
SDUF_2	8e7ac421d1421c2a886275cacd311d6e	530	Pfam	PF03140	Plant protein of unknown function	44	516	7e-111	T	30-05-2022	IPR004158	Protein of unknown function DUF247, plant
SDUF_2	8e7ac421d1421c2a886275cacd311d6e	530	PANTHER	PTHR31549:SF211	-	10	526	1.6e-200	T	30-05-2022	-	-
SDUF_2	8e7ac421d1421c2a886275cacd311d6e	530	PANTHER	PTHR31549	PROTEIN, PUTATIVE (DUF247)-RELATED-RELATED	10	526	1.6e-200	T	30-05-2022	IPR004158	Protein of unknown function DUF247, plant
KYUSt_chr2.53291	cc3302b1877c213fbd9f733cbe209bc3	124	Pfam	PF08265	YL1 nuclear protein C-terminal domain	74	102	1.1e-14	T	30-05-2022	IPR013272	Vps72/YL1, C-terminal
KYUSt_chr2.53291	cc3302b1877c213fbd9f733cbe209bc3	124	SMART	SM00993	YL1_C_2	73	102	8.3e-13	T	30-05-2022	IPR013272	Vps72/YL1, C-terminal
KYUSt_chr2.53291	cc3302b1877c213fbd9f733cbe209bc3	124	PANTHER	PTHR31200	INO80 COMPLEX SUBUNIT C	2	123	2.8e-47	T	30-05-2022	IPR029525	INO80 complex, subunit Ies6
KYUSt_chr2.53471	a6152d7322a78d8a791f2820c34a63d9	205	ProSiteProfiles	PS51257	Prokaryotic membrane lipoprotein lipid attachment site profile.	1	19	5	T	30-05-2022	-	-

## Sheet: Chr2_Z
Accession	MD5 digest	Len	Analysis	Signature Accession	Present at S?	Signature Description	Start Location	Stop location	Score (eval)	Status (T=true)	Date	Interpro annotations (accession)	Interpro annotations (description)
KYUSt_chr2.53334	86c52eea7fdcdfb107d710d62e2d5456	479	PANTHER	PTHR10196:SF91	#N/A	-	1	475	3.5e-250	T	30-05-2022	-	-
KYUSt_chr2.53334	86c52eea7fdcdfb107d710d62e2d5456	479	PANTHER	PTHR10196	#N/A	SUGAR KINASE	1	475	3.5e-250	T	30-05-2022	-	-
KYUSt_chr2.53349	5733ddf858fdce31f52e4d1596b62f16	555	PANTHER	PTHR21646:SF66	#N/A	UBIQUITINYL HYDROLASE 1	171	551	1.7e-225	T	30-05-2022	-	-
KYUSt_chr2.53349	5733ddf858fdce31f52e4d1596b62f16	555	PANTHER	PTHR21646:SF66	#N/A	UBIQUITINYL HYDROLASE 1	6	166	1.7e-225	T	30-05-2022	-	-
KYUSt_chr2.53349	5733ddf858fdce31f52e4d1596b62f16	555	PANTHER	PTHR21646	#N/A	UBIQUITIN CARBOXYL-TERMINAL HYDROLASE	171	551	1.7e-225	T	30-05-2022	-	-
KYUSt_chr2.53349	5733ddf858fdce31f52e4d1596b62f16	555	PANTHER	PTHR21646	#N/A	UBIQUITIN CARBOXYL-TERMINAL HYDROLASE	6	166	1.7e-225	T	30-05-2022	-	-
KYUSt_chr2.53351	789fcf1177f55895fefdb79c60bc095c	221	PANTHER	PTHR14614:SF123	#N/A	OSJNBA0070O11.4 PROTEIN	5	216	8.5e-80	T	30-05-2022	-	-
KYUSt_chr2.53351	789fcf1177f55895fefdb79c60bc095c	221	PANTHER	PTHR14614	#N/A	HEPATOCELLULAR CARCINOMA-ASSOCIATED ANTIGEN	5	216	8.5e-80	T	30-05-2022	IPR019410	Lysine methyltransferase
KYUSt_chr2.53293	cdee1e7cfe5aaf4b5cdc266b49b097cd	432	PANTHER	PTHR21077	#N/A	EME1 PROTEIN	63	293	1.8e-141	T	30-05-2022	IPR033310	Mms4/EME1/EME2
KYUSt_chr2.53293	cdee1e7cfe5aaf4b5cdc266b49b097cd	432	PANTHER	PTHR21077:SF8	#N/A	-	312	432	1.8e-141	T	30-05-2022	-	-
KYUSt_chr2.53293	cdee1e7cfe5aaf4b5cdc266b49b097cd	432	PANTHER	PTHR21077	#N/A	EME1 PROTEIN	312	432	1.8e-141	T	30-05-2022	IPR033310	Mms4/EME1/EME2
KYUSt_chr2.53293	cdee1e7cfe5aaf4b5cdc266b49b097cd	432	PANTHER	PTHR21077	#N/A	EME1 PROTEIN	1	64	1.8e-141	T	30-05-2022	IPR033310	Mms4/EME1/EME2
KYUSt_chr2.53293	cdee1e7cfe5aaf4b5cdc266b49b097cd	432	PANTHER	PTHR21077:SF8	#N/A	-	63	293	1.8e-141	T	30-05-2022	-	-
KYUSt_chr2.53293	cdee1e7cfe5aaf4b5cdc266b49b097cd	432	PANTHER	PTHR21077:SF8	#N/A	-	1	64	1.8e-141	T	30-05-2022	-	-
KYUSt_chr2.53289	e32a9a0ef5b48c5b67b1705e67e93744	871	PANTHER	PTHR31580	#N/A	FILAMENT-LIKE PLANT PROTEIN 4	707	863	4.3e-230	T	30-05-2022	-	-
KYUSt_chr2.53289	e32a9a0ef5b48c5b67b1705e67e93744	871	PANTHER	PTHR31580:SF22	#N/A	FILAMENT-LIKE PLANT PROTEIN 7	72	711	4.3e-230	T	30-05-2022	-	-
KYUSt_chr2.53289	e32a9a0ef5b48c5b67b1705e67e93744	871	PANTHER	PTHR31580:SF22	#N/A	FILAMENT-LIKE PLANT PROTEIN 7	707	863	4.3e-230	T	30-05-2022	-	-
KYUSt_chr2.53289	e32a9a0ef5b48c5b67b1705e67e93744	871	PANTHER	PTHR31580:SF22	#N/A	FILAMENT-LIKE PLANT PROTEIN 7	5	47	4.3e-230	T	30-05-2022	-	-
KYUSt_chr2.53289	e32a9a0ef5b48c5b67b1705e67e93744	871	PANTHER	PTHR31580	#N/A	FILAMENT-LIKE PLANT PROTEIN 4	72	711	4.3e-230	T	30-05-2022	-	-
KYUSt_chr2.53289	e32a9a0ef5b48c5b67b1705e67e93744	871	PANTHER	PTHR31580	#N/A	FILAMENT-LIKE PLANT PROTEIN 4	5	47	4.3e-230	T	30-05-2022	-	-
KYUSt_chr2.53422	99b61d85ea4578f8828c65fa3e03255c	832	PANTHER	PTHR11689	#N/A	CHLORIDE CHANNEL PROTEIN CLC FAMILY MEMBER	52	814	0	T	30-05-2022	-	-
KYUSt_chr2.53422	99b61d85ea4578f8828c65fa3e03255c	832	PANTHER	PTHR11689:SF147	#N/A	CHLORIDE CHANNEL PROTEIN	52	814	0	T	30-05-2022	-	-
KYUSt_chr2.53455	37b2666f8b4b3cf3e42f905308cd2cb8	388	PANTHER	PTHR43194:SF2	#N/A	ALPHA/BETA-HYDROLASES SUPERFAMILY PROTEIN	110	387	3e-81	T	30-05-2022	-	-
KYUSt_chr2.53455	37b2666f8b4b3cf3e42f905308cd2cb8	388	PANTHER	PTHR43194	#N/A	HYDROLASE ALPHA/BETA FOLD FAMILY	110	387	3e-81	T	30-05-2022	-	-
KYUSt_chr2.53480	5b9dc891f7f0bfc11c2da5aad20f4fe1	280	PANTHER	PTHR31731:SF20	#N/A	36.4 KDA PROLINE-RICH PROTEIN	1	279	4.2e-82	T	30-05-2022	-	-
KYUSt_chr2.53480	5b9dc891f7f0bfc11c2da5aad20f4fe1	280	PANTHER	PTHR31731	#N/A	-	1	279	4.2e-82	T	30-05-2022	-	-
KYUSt_chr2.53424	c917a529143e22c017b94b37b3a3bd65	369	PANTHER	PTHR10805:SF2	#N/A	COATOMER SUBUNIT EPSILON-2	312	369	4.1e-157	T	30-05-2022	-	-
KYUSt_chr2.53424	c917a529143e22c017b94b37b3a3bd65	369	PANTHER	PTHR10805:SF2	#N/A	COATOMER SUBUNIT EPSILON-2	31	267	4.1e-157	T	30-05-2022	-	-
KYUSt_chr2.53424	c917a529143e22c017b94b37b3a3bd65	369	PANTHER	PTHR10805	#N/A	COATOMER SUBUNIT EPSILON	312	369	4.1e-157	T	30-05-2022	IPR006822	Coatomer, epsilon subunit
KYUSt_chr2.53424	c917a529143e22c017b94b37b3a3bd65	369	PANTHER	PTHR10805	#N/A	COATOMER SUBUNIT EPSILON	31	267	4.1e-157	T	30-05-2022	IPR006822	Coatomer, epsilon subunit
KYUSt_chr2.53323	aa070e31400c5490b4f58dc49eccd5f9	203	PANTHER	PTHR22952:SF383	#N/A	-	1	173	6.2e-39	T	30-05-2022	-	-
KYUSt_chr2.53323	aa070e31400c5490b4f58dc49eccd5f9	203	PANTHER	PTHR22952	#N/A	CAMP-RESPONSE ELEMENT BINDING PROTEIN-RELATED	1	173	6.2e-39	T	30-05-2022	IPR043452	Plant bZIP transcription factors
KYUSt_chr2.53353	59ba76159636fcc9487abd1893c65d09	204	PANTHER	PTHR33402:SF19	#N/A	VQ MOTIF-CONTAINING PROTEIN 11	20	202	5e-49	T	30-05-2022	-	-
KYUSt_chr2.53353	59ba76159636fcc9487abd1893c65d09	204	PANTHER	PTHR33402	#N/A	VQ MOTIF-CONTAINING PROTEIN 11-LIKE	20	202	5e-49	T	30-05-2022	IPR039611	VQ motif-containing protein 4/11/13/19/31/33
KYUSt_chr2.53421	0456c6e5ff125ef91dddac716bf35b08	116	PANTHER	PTHR10252:SF41	#N/A	HAP5 SUBUNIT OF HAP COMPLEX	1	90	2.4e-33	T	30-05-2022	-	-
KYUSt_chr2.53421	0456c6e5ff125ef91dddac716bf35b08	116	PANTHER	PTHR10252	#N/A	HISTONE-LIKE TRANSCRIPTION FACTOR CCAAT-RELATED	1	90	2.4e-33	T	30-05-2022	-	-
KYUSt_chr2.53330	9b0bc5ad3d6e7cd58257381c15afc3dc	609	PANTHER	PTHR48062	#N/A	RECEPTOR-LIKE PROTEIN 14	92	161	1.6e-223	T	30-05-2022	-	-
KYUSt_chr2.53330	9b0bc5ad3d6e7cd58257381c15afc3dc	609	PANTHER	PTHR48062	#N/A	RECEPTOR-LIKE PROTEIN 14	157	603	1.6e-223	T	30-05-2022	-	-
KYUSt_chr2.53330	9b0bc5ad3d6e7cd58257381c15afc3dc	609	PANTHER	PTHR48062:SF32	#N/A	OS04G0648400 PROTEIN	92	161	1.6e-223	T	30-05-2022	-	-
KYUSt_chr2.53330	9b0bc5ad3d6e7cd58257381c15afc3dc	609	PANTHER	PTHR48062:SF32	#N/A	OS04G0648400 PROTEIN	157	603	1.6e-223	T	30-05-2022	-	-
KYUSt_chr2.53335	8d56ca4cc398cde394b04bed9b88371f	1954	PANTHER	PTHR33116	#N/A	REVERSE TRANSCRIPTASE ZINC-BINDING DOMAIN-CONTAINING PROTEIN-RELATED-RELATED	921	1850	4.5e-113	T	30-05-2022	-	-
KYUSt_chr2.53335	8d56ca4cc398cde394b04bed9b88371f	1954	PANTHER	PTHR33116:SF38	#N/A	OS01G0158850 PROTEIN	921	1850	4.5e-113	T	30-05-2022	-	-
KYUSt_chr2.53292	c69d275ec6fa94d8de7850778de1af23	496	PANTHER	PTHR33428	#N/A	CHLOROPHYLLASE-2, CHLOROPLASTIC	185	495	1.7e-113	T	30-05-2022	-	-
KYUSt_chr2.53254	bd9216b2b6a89abb2e6aeecdb8e26eeb	484	PANTHER	PTHR32467	#N/A	AP2-LIKE ETHYLENE-RESPONSIVE TRANSCRIPTION FACTOR	1	465	2.7e-155	T	30-05-2022	-	-
KYUSt_chr2.53254	bd9216b2b6a89abb2e6aeecdb8e26eeb	484	PANTHER	PTHR32467:SF142	#N/A	FLORAL HOMEOTIC PROTEIN APETALA 2	1	465	2.7e-155	T	30-05-2022	-	-
KYUSt_chr2.53492	7bf0de3f765a6299e7015953a6f95e0d	818	PANTHER	PTHR34835	#N/A	OS07G0283600 PROTEIN-RELATED	168	775	6.8e-92	T	30-05-2022	-	-
KYUSt_chr2.53492	7bf0de3f765a6299e7015953a6f95e0d	818	PANTHER	PTHR34835:SF38	#N/A	-	168	775	6.8e-92	T	30-05-2022	-	-
KYUSt_chr2.53352	bda2434dbd76b0f1bd47d29eca82c4d7	812	PANTHER	PTHR47938	#N/A	RESPIRATORY COMPLEX I CHAPERONE (CIA84), PUTATIVE (AFU_ORTHOLOGUE AFUA_2G06020)-RELATED	52	628	2.4e-260	T	30-05-2022	-	-
KYUSt_chr2.53352	bda2434dbd76b0f1bd47d29eca82c4d7	812	PANTHER	PTHR47938:SF5	#N/A	OS07G0213300 PROTEIN	52	628	2.4e-260	T	30-05-2022	-	-
KYUSt_chr2.53350	eb46c024672aa5a2cbe23833983d19b5	398	PANTHER	PTHR23051	#N/A	SOLUTE CARRIER FAMILY 35, MEMBER F5	5	396	5.8e-183	T	30-05-2022	-	-
KYUSt_chr2.53350	eb46c024672aa5a2cbe23833983d19b5	398	PANTHER	PTHR23051:SF12	#N/A	OSJNBA0070O11.5 PROTEIN	5	396	5.8e-183	T	30-05-2022	-	-
KYUSt_chr2.53355	c6f88ed7576ac2762ac66b52cb74be47	256	PANTHER	PTHR47482:SF5	#N/A	AP COMPLEX SUBUNIT SIGMA	89	205	9.5e-60	T	30-05-2022	-	-
KYUSt_chr2.53355	c6f88ed7576ac2762ac66b52cb74be47	256	PANTHER	PTHR47482	#N/A	OS11G0632001 PROTEIN	89	205	9.5e-60	T	30-05-2022	-	-
KYUSt_chr2.53294	818042ed6d04ea27c8d1ff1f40169653	490	PANTHER	PTHR21077:SF8	#N/A	-	320	474	5.4e-52	T	30-05-2022	-	-
KYUSt_chr2.53294	818042ed6d04ea27c8d1ff1f40169653	490	PANTHER	PTHR21077	#N/A	EME1 PROTEIN	320	474	5.4e-52	T	30-05-2022	IPR033310	Mms4/EME1/EME2
KYUSt_chr2.53310	331de495b3bbcd2aa7ac6548c6d423bc	770	PANTHER	PTHR24007	#N/A	BRCA1-ASSOCIATED PROTEIN	1	530	1e-224	T	30-05-2022	-	-
KYUSt_chr2.53310	331de495b3bbcd2aa7ac6548c6d423bc	770	PANTHER	PTHR24007:SF10	#N/A	BRAP2 RING ZNF UBP DOMAIN-CONTAINING PROTEIN 1	1	530	1e-224	T	30-05-2022	IPR033273	RING domain containing protein BRIZ1/BRIZ2
KYUSt_chr2.53371	717642c8ad2b0e48d7a962636ea5a091	1671	PANTHER	PTHR12601:SF45	#N/A	TETRATRICOPEPTIDE REPEAT (TPR)-LIKE SUPERFAMILY PROTEIN	1	1668	0	T	30-05-2022	-	-
KYUSt_chr2.53371	717642c8ad2b0e48d7a962636ea5a091	1671	PANTHER	PTHR12601	#N/A	EUKARYOTIC TRANSLATION INITIATION FACTOR 3 SUBUNIT EIF-3	1	1668	0	T	30-05-2022	IPR027523	CLU domain containing protein
KYUSt_chr2.53481	f2736d342c12fcb416cca4112ca61ca5	570	PANTHER	PTHR12948	#N/A	NEDD8 ULTIMATE BUSTER-1 BS4 PROTEIN	33	568	4e-177	T	30-05-2022	IPR039749	NEDD8 ultimate buster 1
KYUSt_chr2.53236	5820164212792d4fcd4c8c4d7a48aeda	162	PANTHER	PTHR16134	KYUSt_chr1.6316	F-BOX/TPR REPEAT PROTEIN POF3	79	144	7.7e-17	T	30-05-2022	-	-
KYUSt_chr2.53236	5820164212792d4fcd4c8c4d7a48aeda	162	PANTHER	PTHR16134:SF57	#N/A	F-BOX PROTEIN FBX14	79	144	7.7e-17	T	30-05-2022	-	-
KYUSt_chr2.53454	7a102e3b12bdb587b332661dbcfcf925	233	PANTHER	PTHR11477	#N/A	TRANSCRIPTION FACTOR S-II ZINC FINGER DOMAIN-CONTAINING PROTEIN	62	104	4.4e-13	T	30-05-2022	-	-
KYUSt_chr2.53454	7a102e3b12bdb587b332661dbcfcf925	233	PANTHER	PTHR11477:SF38	#N/A	OS04G0644675 PROTEIN	62	104	4.4e-13	T	30-05-2022	-	-
KYUSt_chr2.53354	ef4d774ae5e4f54ab24d05656f38cca8	308	PANTHER	PTHR31669	#N/A	PROTEIN FAR1-RELATED SEQUENCE 10-RELATED	56	190	1.2e-45	T	30-05-2022	IPR031052	FHY3/FAR1 family
KYUSt_chr2.53354	ef4d774ae5e4f54ab24d05656f38cca8	308	PANTHER	PTHR31669	#N/A	PROTEIN FAR1-RELATED SEQUENCE 10-RELATED	1	56	1.2e-45	T	30-05-2022	IPR031052	FHY3/FAR1 family
KYUSt_chr2.53354	ef4d774ae5e4f54ab24d05656f38cca8	308	PANTHER	PTHR31669:SF175	#N/A	OS04G0354200 PROTEIN	1	56	1.2e-45	T	30-05-2022	-	-
KYUSt_chr2.53354	ef4d774ae5e4f54ab24d05656f38cca8	308	PANTHER	PTHR31669:SF175	#N/A	OS04G0354200 PROTEIN	56	190	1.2e-45	T	30-05-2022	-	-
KYUSt_chr2.53380	c0991319f77719d2eeafde596f17b96e	570	PANTHER	PTHR10774:SF195	#N/A	SYNAPTOTAGMIN-5	1	569	0	T	30-05-2022	-	-
KYUSt_chr2.53380	c0991319f77719d2eeafde596f17b96e	570	PANTHER	PTHR10774	#N/A	EXTENDED SYNAPTOTAGMIN-RELATED	1	569	0	T	30-05-2022	IPR045050	Synaptotagmin, plant
KYUSt_chr2.53456	d8eb89358f6d7e280a4c05bfcb87d06e	129	PANTHER	PTHR31731	#N/A	-	9	129	2.9e-33	T	30-05-2022	-	-
KYUSt_chr2.53456	d8eb89358f6d7e280a4c05bfcb87d06e	129	PANTHER	PTHR31731:SF19	#N/A	PROLINE-RICH PROTEIN DC2.15	9	129	2.9e-33	T	30-05-2022	-	-
KYUSt_chr2.53291	cc3302b1877c213fbd9f733cbe209bc3	124	PANTHER	PTHR31200	#N/A	INO80 COMPLEX SUBUNIT C	2	123	2.8e-47	T	30-05-2022	IPR029525	INO80 complex, subunit Ies6
ZDUF_1	ff12410ce203a440d603b160202323b3	582	PANTHER	PTHR31549:SF211	SDUF_2	-	40	575	6.7e-173	T	30-05-2022	-	-
ZDUF_1	ff12410ce203a440d603b160202323b3	582	PANTHER	PTHR31549	SDUF_3	PROTEIN, PUTATIVE (DUF247)-RELATED-RELATED	40	575	6.7e-173	T	30-05-2022	IPR004158	Protein of unknown function DUF247, plant
ZDUF_4	48ae61ae722ef414e1445f821828f5b7	529	PANTHER	PTHR31549	SDUF_3	PROTEIN, PUTATIVE (DUF247)-RELATED-RELATED	12	521	9.8e-165	T	30-05-2022	IPR004158	Protein of unknown function DUF247, plant
ZDUF_4	48ae61ae722ef414e1445f821828f5b7	529	PANTHER	PTHR31549:SF211	SDUF_2	-	12	521	9.8e-165	T	30-05-2022	-	-

## Sheet: Chr1_S
Accession	MD5 digest	Len	Analysis	Signature Accession	Signature Description	Start Location	Stop location	Score (eval)	Status (T=true)	Date	Interpro annotations (accession)	Interpro annotations (description)	Accession
KYUSt_chr1.6189	4284dcf1fdb3c353842d6a6acc00fbaf	460	PANTHER	PTHR45560	OS04G0163150 PROTEIN-RELATED	9	460	1.1e-182	T	30-05-2022	-	-	KYUSt_chr1.6189
KYUSt_chr1.6189	4284dcf1fdb3c353842d6a6acc00fbaf	460	PANTHER	PTHR45560:SF4	-	9	460	1.1e-182	T	30-05-2022	-	-	KYUSt_chr1.6189
KYUSt_chr1.6210	c776e9b7953b7faf808e6c3a43bcbb55	243	PANTHER	PTHR10146:SF15	PYRIDOXAL PHOSPHATE HOMEOSTASIS PROTEIN	5	242	7.6e-121	T	30-05-2022	-	-	KYUSt_chr1.6210
KYUSt_chr1.6210	c776e9b7953b7faf808e6c3a43bcbb55	243	PANTHER	PTHR10146	PROLINE SYNTHETASE CO-TRANSCRIBED BACTERIAL HOMOLOG PROTEIN	5	242	7.6e-121	T	30-05-2022	IPR011078	Pyridoxal phosphate homeostasis protein	KYUSt_chr1.6210
KYUSt_chr1.6176	8cf24b922fa9b375731757afd9a3a70b	834	PANTHER	PTHR45560	OS04G0163150 PROTEIN-RELATED	414	834	2.3e-172	T	30-05-2022	-	-	KYUSt_chr1.6176
KYUSt_chr1.6176	8cf24b922fa9b375731757afd9a3a70b	834	PANTHER	PTHR45560:SF4	-	414	834	2.3e-172	T	30-05-2022	-	-	KYUSt_chr1.6176
KYUSt_chr1.6215	acd376fd5990867f3ec44f343fdd88ed	95	PANTHER	PTHR11588	TUBULIN	36	91	2.5e-31	T	30-05-2022	IPR000217	Tubulin	KYUSt_chr1.6215
KYUSt_chr1.6215	acd376fd5990867f3ec44f343fdd88ed	95	PANTHER	PTHR11588:SF351	TUBULIN BETA-2 CHAIN	36	91	2.5e-31	T	30-05-2022	-	-	KYUSt_chr1.6215
KYUSt_chr1.6308	277288afeaa414bef1eb0d1e8558c473	1105	PANTHER	PTHR10799:SF986	OS05G0150300 PROTEIN	8	1094	0	T	30-05-2022	-	-	KYUSt_chr1.6308
KYUSt_chr1.6308	277288afeaa414bef1eb0d1e8558c473	1105	PANTHER	PTHR10799	SNF2/RAD54 HELICASE FAMILY	8	1094	0	T	30-05-2022	-	-	KYUSt_chr1.6308
KYUSt_chr1.6161	b68325ed22745abe86a4153070aa8a4e	1005	PANTHER	PTHR12558	CELL DIVISION CYCLE 16,23,27	5	544	5.3e-206	T	30-05-2022	-	-	KYUSt_chr1.6161
KYUSt_chr1.6161	b68325ed22745abe86a4153070aa8a4e	1005	PANTHER	PTHR12558:SF36	ANAPHASE-PROMOTING COMPLEX SUBUNIT 7	5	544	5.3e-206	T	30-05-2022	-	-	KYUSt_chr1.6161
KYUSt_chr1.6309	3e2c900129083b20fab6f9bf8f19a1ee	572	PANTHER	PTHR46031	-	90	572	1.3e-210	T	30-05-2022	-	-	KYUSt_chr1.6309
KYUSt_chr1.6309	3e2c900129083b20fab6f9bf8f19a1ee	572	PANTHER	PTHR46031:SF2	DOUBLE-STRANDED RNA-BINDING PROTEIN 2	90	572	1.3e-210	T	30-05-2022	-	-	KYUSt_chr1.6309
KYUSt_chr1.6209	989d86281070f3d6711dd89620ddfd00	1677	PANTHER	PTHR23155	DISEASE RESISTANCE PROTEIN RP	10	1073	6.4e-219	T	30-05-2022	IPR044974	Disease resistance protein, plants	KYUSt_chr1.6209
KYUSt_chr1.6209	989d86281070f3d6711dd89620ddfd00	1677	PANTHER	PTHR23155	DISEASE RESISTANCE PROTEIN RP	1109	1488	6.4e-219	T	30-05-2022	IPR044974	Disease resistance protein, plants	KYUSt_chr1.6209
KYUSt_chr1.6209	989d86281070f3d6711dd89620ddfd00	1677	PANTHER	PTHR23155:SF1026	OS01G0112800 PROTEIN	10	1073	6.4e-219	T	30-05-2022	-	-	KYUSt_chr1.6209
KYUSt_chr1.6209	989d86281070f3d6711dd89620ddfd00	1677	PANTHER	PTHR23155:SF1026	OS01G0112800 PROTEIN	1109	1488	6.4e-219	T	30-05-2022	-	-	KYUSt_chr1.6209
KYUSt_chr1.6328	18fa887658584dbaf94c40198d8977f9	417	PANTHER	PTHR33110:SF99	-	13	405	4.1e-82	T	30-05-2022	-	-	KYUSt_chr1.6328
KYUSt_chr1.6328	18fa887658584dbaf94c40198d8977f9	417	PANTHER	PTHR33110	F-BOX/KELCH-REPEAT PROTEIN-RELATED	13	405	4.1e-82	T	30-05-2022	-	-	KYUSt_chr1.6328
KYUSt_chr1.6323	b3371037e6f0589b9aba580ac2a10e4d	848	PANTHER	PTHR13710	DNA HELICASE RECQ FAMILY MEMBER	7	835	0	T	30-05-2022	-	-	KYUSt_chr1.6323
KYUSt_chr1.6323	b3371037e6f0589b9aba580ac2a10e4d	848	PANTHER	PTHR13710:SF69	ATP-DEPENDENT DNA HELICASE Q-LIKE SIM	7	835	0	T	30-05-2022	-	-	KYUSt_chr1.6323
KYUSt_chr1.6316	a94bdd30d50ba0322176d87b93ffed28	586	PANTHER	PTHR16134	F-BOX/TPR REPEAT PROTEIN POF3	12	585	8.9e-280	T	30-05-2022	-	-	KYUSt_chr1.6316
KYUSt_chr1.6316	a94bdd30d50ba0322176d87b93ffed28	586	PANTHER	PTHR16134:SF66	PROTEIN TRANSPORT INHIBITOR RESPONSE 1	12	585	8.9e-280	T	30-05-2022	-	-	KYUSt_chr1.6316
SDUF_3	a1c7b78aa62c358f0102d7f919bc5cfd	550	PANTHER	PTHR31549	PROTEIN, PUTATIVE (DUF247)-RELATED-RELATED	2	547	4.5e-237	T	30-05-2022	IPR004158	Protein of unknown function DUF247, plant	SDUF_3
SDUF_3	a1c7b78aa62c358f0102d7f919bc5cfd	550	PANTHER	PTHR31549:SF189	OS05G0197900 PROTEIN	2	547	4.5e-237	T	30-05-2022	-	-	SDUF_3
SDUF_2	8e7ac421d1421c2a886275cacd311d6e	530	PANTHER	PTHR31549:SF211	-	10	526	1.6e-200	T	30-05-2022	-	-	SDUF_2
SDUF_2	8e7ac421d1421c2a886275cacd311d6e	530	PANTHER	PTHR31549	PROTEIN, PUTATIVE (DUF247)-RELATED-RELATED	10	526	1.6e-200	T	30-05-2022	IPR004158	Protein of unknown function DUF247, plant	SDUF_2
