# Supplementary material for: Identification of the genes at S and Z reveals the molecular basis and evolution of grass self-incompatibility
Source: Front Plant Sci. 2022 Oct 18;13:1011299. doi: 10.3389/fpls.2022.1011299 (PMC9623065; doi:10.3389/fpls.2022.1011299)
Supplement: Supplementary file 4 [file DataSheet_2.xlsx]

## Sheet: Sheet1
Supplementary dataset S2: tBLASTn results using proteins from the S- and Z-loci as queries. The first blast hit was always the native location, the second blast hit was noted when it was at the opposite (S or Z) locus.
query_id	subject_id	pct_identity	aln_length	n_of_mismatches	gap_openings	q_start	q_end	s_start	s_end	e_value	bit_score	Second hit at S/Z-locus?
ZP_1	chr2	100	43	0	0	1	43	332798665	332798537	1.14e-20	89
ZDUF_1	chr2	100	582	0	0	1	582	332800867	332799122	0	1196
ZDUF_1	chr1	41.513	542	289	6	41	578	38452196	38450643	8.69e-126	413	Yes
ZDUF_1	chr6	37.184	554	331	5	36	582	11315122	11313491	8.66e-106	355	No
ZDUF_1	chr4	27.037	540	320	18	73	577	147896511	147898013	1.63e-36	152	No
SDUF_2	chr1	100	530	0	0	1	530	38452229	38450640	0	1080
SDUF_2	chr2	45.936	529	260	7	12	529	332860208	332861749	1.4e-130	425	Yes
SDUF_2	chr6	40.816	539	294	7	12	529	11315107	11313503	3.58e-116	383	No
SDUF_2	chr4	26.786	560	331	17	17	528	147896427	147898013	3.23e-44	174	No
SP	chr1	78.302	106	0	1	1	83	38449393	38449710	1.43e-36	134
SP	chr2	42.857	28	16	0	53	80	109277167	109277250	3	31.2	Yes
SP	chr4	45.455	33	17	1	51	83	221661778	221661683	5.8	30.4	No
ZDUF_4	chr2	100	529	0	0	1	529	332860175	332861761	0	1056
ZDUF_4	chr1	44.234	529	237	10	12	499	38195285	38193750	4.97e-129	420	Yes
ZDUF_4	chr6	41.756	558	280	5	2	526	11315137	11313500	3.97e-113	374	No
ZDUF_4	chr4	26.552	580	313	18	13	524	147896409	147898013	7.57e-37	151	No
SDUF_3	chr1	100	552	0	0	1	552	38195315	38193660	0	1098
SDUF_3	chr2	44.165	557	253	8	11	550	332860208	332861755	1.14e-138	449	Yes
SDUF_3	chr6	40.603	564	278	10	11	547	11315107	11313506	4.9e-113	375	No
SDUF_3	chr4	27.925	530	330	14	42	547	147896508	147898013	8.99e-43	170	No
ZP_4	chr2	75.455	110	0	1	1	83	332813425	332813096	2.2e-44	156
KYUSt_chr1.6161	chr1	100	452	0	0	554	1005	37879062	37880417	0	939
KYUSt_chr1.6161	chr7	52.415	414	170	11	587	988	137244201	137245397	2.29e-104	365	No
KYUSt_chr1.6161	chr4	49.024	410	178	11	601	1005	331798154	331799305	4.98e-93	332	No
KYUSt_chr1.6161	chr5	41.975	405	189	14	577	967	75555507	75556625	5.71e-62	237	No
KYUSt_chr1.6176	chr1	100	461	0	0	374	834	37982853	37984235	0	966
KYUSt_chr1.6176	chr7	48.649	444	202	12	384	817	137244114	137245397	1.11e-101	352	No
KYUSt_chr1.6176	chr4	46.636	431	185	13	415	834	331803840	331805030	2.99e-97	339	No
KYUSt_chr1.6176	chr5	43.127	371	170	11	409	771	75555528	75556541	5.29e-70	248	No
KYUSt_chr1.6189	chr1	100	436	0	0	25	460	38052496	38053803	0	910
KYUSt_chr1.6189	chr7	52.567	409	177	9	49	452	137244234	137245424	4.92e-109	360	No
KYUSt_chr1.6189	chr4	49.038	416	179	11	50	460	331803867	331805030	3.78e-106	351	No
KYUSt_chr1.6189	chr5	43.697	357	171	11	50	402	75555549	75556541	4.71e-65	233	No
KYUSt_chr1.6209	chr1	100	1565	0	0	1	1565	38151738	38156432	0	2943
KYUSt_chr1.6209	chr3	44.697	1537	732	29	11	1509	305650050	305654420	0	1024	No
KYUSt_chr1.6209	chr2	42.322	1387	710	26	6	1355	293537001	293541002	0	873	No
KYUSt_chr1.6209	chr5	44.314	1108	553	23	233	1323	29783728	29786910	0	742	No
KYUSt_chr1.6210	chr1	63.522	159	1	2	142	243	38161880	38161404	4.16e-51	183
KYUSt_chr1.6210	chr3	72.917	48	13	0	141	188	283367939	283367796	3.28e-28	78.2	No
KYUSt_chr1.6210	contig_5317	28.07	57	40	1	58	113	2124	2294	0.97	36.6	No
KYUSt_chr1.6214	chr1	69.129	379	90	5	1	371	38195294	38194215	1.38e-145	463
KYUSt_chr1.6214	chr2	55.215	163	73	0	252	414	332861267	332861755	1.48e-50	189	Yes	DUF annotation
KYUSt_chr1.6214	chr6	56.494	154	67	0	258	411	11313967	11313506	2.21e-46	176	No
KYUSt_chr1.6214	chr4	41.401	157	89	2	258	411	148002151	148002621	5.17e-24	110	No
KYUSt_chr1.6215	chr1	100	61	0	0	35	95	38200783	38200601	1.1e-35	132
KYUSt_chr1.6215	chr3	72.289	83	21	2	8	90	121460255	121460013	1.99e-31	120	No
KYUSt_chr1.6215	chr4	82.456	57	10	0	35	91	48181105	48180935	8.37e-28	110	No
KYUSt_chr1.6215	chr6	82.143	56	10	0	36	91	157912538	157912705	1.19e-26	107	No
KYUSt_chr1.6286	chr1	85.938	192	0	1	1	165	38638150	38638725	7.17e-59	204
KYUSt_chr1.6286	chr3	72.5	120	24	3	38	148	166726018	166725659	1.26e-27	87	No
KYUSt_chr1.6286	chr6	60.684	117	40	2	38	148	154326993	154327343	7.13e-26	77	No
KYUSt_chr1.6286	chr7	63.415	123	32	3	38	148	99952892	99953257	2.52e-25	92	No
KYUSt_chr1.6308	chr1	80.537	149	1	1	313	433	38852953	38853399	1.37e-148	239
KYUSt_chr1.6308	chr2	39.864	587	287	14	160	717	166705537	166703888	1.52e-113	395	No
KYUSt_chr1.6308	contig_605	76.154	130	5	1	551	654	6694295	6693906	3.92e-92	202	No
KYUSt_chr1.6308	chr7	44.482	299	158	3	219	509	386434	387330	6.86e-74	275	No
KYUSt_chr1.6309	chr1	99.756	409	1	0	164	572	38860922	38859696	0	745
KYUSt_chr1.6309	chr7	94.643	56	3	0	34	89	201175191	201175358	4.43e-24	113	No
KYUSt_chr1.6309	chr5	92.857	56	4	0	34	89	243252459	243252626	2.27e-23	111	No
KYUSt_chr1.6309	chr4	89.286	56	6	0	34	89	48798131	48797964	1.58e-22	108	No
KYUSt_chr1.6316	chr1	91.026	468	0	1	161	586	38913778	38912375	0	850
KYUSt_chr1.6316	contig_2278	51.634	459	186	4	162	586	265847	264477	1.84e-137	447	No
KYUSt_chr1.6316	chr6	41.81	464	223	7	162	586	36843829	36845196	3.22e-102	345	No
KYUSt_chr1.6316	chr4	38.936	470	239	8	156	586	307647549	307646167	1.85e-95	306	No
KYUSt_chr1.6323	chr1	96.954	197	6	0	1	197	38983362	38982772	4.97e-113	386
KYUSt_chr1.6323	chr6	71.287	101	25	2	347	443	120938897	120939199	2.26e-13	80.5	No
KYUSt_chr1.6323	chr2	72.549	51	14	0	538	588	23070720	23070568	2.34e-13	80.5	No
KYUSt_chr1.6323	chr5	53.061	49	23	0	111	159	244807623	244807477	3.12e-10	48.9	No
KYUSt_chr1.6328	chr1	100	417	0	0	1	417	39039367	39038117	0	834
KYUSt_chr1.6328	chr2	43.392	454	204	13	1	417	262238766	262240079	2.36e-90	304	No
KYUSt_chr1.6328	chr5	40.964	415	224	9	5	409	272354384	272353173	2.48e-82	281	No
KYUSt_chr1.6328	chr3	41.727	417	201	16	7	412	72690780	72689623	1.55e-76	264	No
KYUSt_chr2.53236	chr2	100	162	0	0	1	162	332087972	332088457	4.25e-63	214
KYUSt_chr2.53236	chr4	85.106	47	7	0	91	137	307648111	307647971	1.55e-16	80.9	No
KYUSt_chr2.53236	contig_686-1	76.596	47	11	0	91	137	1867979	1867839	2.75e-15	77.4	No
KYUSt_chr2.53236	chr6	58.491	53	22	0	91	143	36842970	36843128	1.16e-09	61.2	No
KYUSt_chr2.53254	chr2	92.857	56	4	0	188	243	332246624	332246791	4.69e-50	116
KYUSt_chr2.53254	chr1	92	50	4	0	190	239	16770653	16770802	9.26e-25	99.8	No
KYUSt_chr2.53254	chr4	90	50	5	0	190	239	29162614	29162465	1.69e-24	98.2	No
KYUSt_chr2.53254	chr7	68	50	16	0	190	239	10480475	10480624	2.51e-22	80.1	No
KYUSt_chr2.53289	chr2	96.336	737	1	1	1	711	332523794	332526004	0	1377
KYUSt_chr2.53289	chr6	31.716	536	266	10	109	587	110351914	110350436	3.42e-50	199	No
KYUSt_chr2.53289	chr4	37.819	431	218	14	50	443	274843051	274844304	5.8e-48	192	No
KYUSt_chr2.53289	chr5	52.083	48	22	1	398	445	80007251	80007391	0.000388	50.4	No
KYUSt_chr2.53291	chr2	100	58	0	0	1	58	332531184	332531357	1.77e-31	122
KYUSt_chr2.53291	chr6	76.471	17	4	0	42	58	149239562	149239512	0.29	33.1	No
KYUSt_chr2.53291	chr7	70.588	17	5	0	42	58	91863006	91862956	0.49	32	No
KYUSt_chr2.53291	chr4	60	20	8	0	42	61	246622297	246622356	0.86	30	No
KYUSt_chr2.53292	chr2	100	184	0	0	313	496	332536569	332536018	3.23e-170	375
KYUSt_chr2.53292	chr7	47.107	121	42	1	48	168	93996906	93997202	6.78e-16	87	No
KYUSt_chr2.53292	chr1	49.618	131	64	2	46	175	16686783	16686394	2.29e-14	82	No
KYUSt_chr2.53292	chr3	78.431	51	11	0	50	100	124930391	124930239	2.1e-13	79	No
KYUSt_chr2.53293	chr2	100	161	0	0	1	161	332546914	332546432	1.97e-47	180
KYUSt_chr2.53293	chr4	40	45	27	0	123	167	110984315	110984449	4.1	35.8	No
KYUSt_chr2.53293	contig_2008	37.778	45	28	0	123	167	988949	988815	5.8	35.4	No
KYUSt_chr2.53293	chr5	23.846	130	91	5	274	398	111387731	111387351	7.1	35	No
KYUSt_chr2.53294	chr2	100	320	0	0	1	320	332560087	332559128	8.34e-179	562
KYUSt_chr2.53295	chr2	100	241	0	0	1	241	332568152	332567430	2.07e-112	360
KYUSt_chr2.53310	chr2	99.543	219	1	0	552	770	332649243	332649899	2.94e-129	431
KYUSt_chr2.53310	chr1	98.63	219	3	0	552	770	250042624	250043280	4.09e-128	427	No
KYUSt_chr2.53310	chr7	94.064	219	13	0	552	770	94789137	94789793	1.25e-121	409	No
KYUSt_chr2.53310	chr4	87.023	131	17	0	639	769	49901227	49900835	3.67e-95	221	No
KYUSt_chr2.53323	chr2	87.5	232	0	1	1	203	332724586	332723891	4.74e-106	339
KYUSt_chr2.53323	chr6	40.496	242	46	10	1	203	213924506	213925054	4.11e-09	60.8	No
KYUSt_chr2.53323	chr5	45.333	75	36	2	75	149	215046265	215046474	4.94e-06	52	No
KYUSt_chr2.53323	chr1	91.667	24	2	0	125	148	190358693	190358622	7.03e-05	48.5	No
KYUSt_chr2.53330	chr2	91.358	567	0	1	92	609	332762011	332760311	0	988
KYUSt_chr2.53330	chr7	51.13	575	216	9	96	608	8403437	8401722	7.43e-157	504	No
KYUSt_chr2.53330	chr4	74.194	248	58	2	368	609	128301561	128300818	1.48e-102	347	No
KYUSt_chr2.53330	chr3	31.67	461	302	9	127	581	281943062	281944423	7.41e-52	198	No
KYUSt_chr2.53334	chr2	100	332	0	0	68	399	332794839	332795834	0	620
KYUSt_chr2.53334	chr7	57.062	177	54	4	229	403	67521054	67521524	6.14e-44	171	No
KYUSt_chr2.53334	chr5	53.005	183	71	5	219	397	232950279	232949764	1.16e-32	138	No
KYUSt_chr2.53334	chr4	50.34	147	51	4	259	403	212828903	212829283	7.21e-31	115	No
KYUSt_chr2.53335	chr2	97.802	1183	1	1	797	1954	332808947	332812495	0	2331
KYUSt_chr2.53335	chr7	94.928	1183	35	1	797	1954	148538923	148542471	0	2269	No
KYUSt_chr2.53335	chr4	96.019	1055	42	0	900	1954	318838098	318834934	0	2059	No
KYUSt_chr2.53335	contig_1948	97.256	984	27	0	971	1954	440549	443500	0	1937	No
KYUSt_chr2.53336	chr2	75.455	110	0	1	1	83	332813425	332813096	2.2e-44	156
KYUSt_chr2.53348	chr2	100	389	0	0	78	466	332860595	332861761	0	766
KYUSt_chr2.53348	chr1	50.836	299	129	3	139	436	38194595	38193750	1.36e-87	298	Yes	DUF annotation
KYUSt_chr2.53348	chr6	48.182	330	161	2	134	463	11314459	11313500	5.87e-75	261	No
KYUSt_chr2.53348	chr7	28.571	336	185	12	111	439	19772468	19773331	7.27e-27	120	No
KYUSt_chr2.53349	chr2	100	253	0	0	303	555	332867046	332867804	5.01e-166	528
KYUSt_chr2.53349	chr6	29.167	144	72	3	315	457	74935351	74935007	1.71e-16	62	No
KYUSt_chr2.53349	contig_444	26.214	206	117	7	322	521	1860239	1860769	4.29e-13	67.8	No
KYUSt_chr2.53349	chr4	29.104	134	66	3	322	454	241727404	241727721	5.58e-12	55.8	No
KYUSt_chr2.53350	chr2	98.529	136	2	0	27	162	332873025	332873432	2.25e-89	251
KYUSt_chr2.53350	chr3	58.228	79	14	2	303	362	14848787	14848551	1.06e-12	75.9	No
KYUSt_chr2.53350	chr7	60	65	10	2	315	363	27975547	27975353	1.47e-08	57.8	No
KYUSt_chr2.53350	chr5	96.552	29	1	0	1	29	228006491	228006405	2.56e-07	58.9	No
KYUSt_chr2.53351	chr2	100	221	0	0	1	221	332878307	332877645	4.7e-140	437
KYUSt_chr2.53351	chr7	38.857	175	96	5	5	175	176885282	176885785	7.64e-14	75.5	No
KYUSt_chr2.53351	chr4	36.957	138	75	7	31	160	289653084	289652683	4.96e-05	49.3	No
KYUSt_chr2.53351	chr1	40.659	91	44	4	71	157	169092870	169092616	0.000108	48.1	No
KYUSt_chr2.53352	chr2	94.186	430	0	1	222	626	332890667	332891956	0	831
KYUSt_chr2.53352	chr7	30.82	451	303	4	189	635	236103739	236102402	2.11e-61	232	No
KYUSt_chr2.53352	chr4	26.434	488	356	2	122	608	62317725	62319182	7.58e-57	218	No
KYUSt_chr2.53352	chr6	25.72	521	349	4	121	605	186403396	186404952	8.76e-57	218	No
KYUSt_chr2.53353	chr2	100	181	0	0	24	204	332905015	332905557	1.37e-58	203
KYUSt_chr2.53353	chr1	55.882	34	13	1	27	58	223918082	223917981	1	35.8	No
KYUSt_chr2.53353	chr7	36.364	44	28	0	29	72	64167951	64168082	9.2	33.1	No
KYUSt_chr2.53354	contig_2087	98.578	211	3	0	95	305	2035515	2034883	3.02e-160	429
KYUSt_chr2.53354	chr2	100	214	0	0	95	308	332908870	332908229	3.24e-143	442	No
KYUSt_chr2.53354	chr6	59.71	345	58	4	40	304	148587027	148585996	2.93e-127	399	No
KYUSt_chr2.53354	chr3	68.182	154	47	1	157	308	39102657	39102196	1.02e-104	208	No
KYUSt_chr2.53355	chr2	96.667	120	4	0	86	205	332910237	332909878	1.18e-74	252
KYUSt_chr2.53355	contig_2087	93.333	120	8	0	86	205	2036882	2036523	6.48e-71	241	No
KYUSt_chr2.53355	chr5	88.889	117	13	0	89	205	273264356	273264006	8.49e-67	229	No
KYUSt_chr2.53355	chr6	81.679	131	21	1	78	205	148588458	148588066	2.32e-66	228	No
KYUSt_chr2.53356	chr2	100	146	0	0	1	146	332920381	332919944	1.38e-76	261
KYUSt_chr2.53356	chr1	60.465	129	49	1	137	263	5191504	5191890	2.8e-36	144	No
KYUSt_chr2.53356	scaffold_1700	65.354	127	43	1	138	263	726450	726070	2.59e-34	139	No
KYUSt_chr2.53356	chr7	73.786	103	26	1	162	263	17519981	17520289	9.59e-32	131	No
KYUSt_chr2.53369	chr2	71.207	323	0	3	1	230	332965381	332964413	9e-94	305
KYUSt_chr2.53371	chr2	99.269	547	4	0	1125	1671	332968447	332966807	0	1079
KYUSt_chr2.53371	chr6	46.886	273	101	4	275	513	20873860	20874648	4.94e-52	209	No
KYUSt_chr2.53380	chr2	80	200	0	1	305	464	333024733	333024134	4.53e-131	286
KYUSt_chr2.53380	chr5	46.053	152	29	2	211	309	166414357	166414812	3.28e-60	122	No
KYUSt_chr2.53380	chr4	44.554	101	54	1	254	354	264423350	264423646	2.67e-19	98.6	No
KYUSt_chr2.53380	chr7	40.789	76	45	0	259	334	40418137	40418364	3.25e-10	69.3	No
KYUSt_chr2.53381	chr2	100	75	0	0	139	213	333033348	333033124	2.06e-41	154
KYUSt_chr2.53381	contig_2402	97.333	75	2	0	139	213	118884	119108	1.04e-39	149	No
KYUSt_chr2.53381	chr6	70.968	124	35	1	1	124	113716131	113716499	2.87e-24	105	No
KYUSt_chr2.53381	chr4	70.968	124	35	1	1	124	168811548	168811916	1.1e-23	103	No
KYUSt_chr2.53382	chr2	100	134	0	0	1	134	333038523	333038924	1.02e-73	247
KYUSt_chr2.53421	chr2	100	116	0	0	1	116	333229426	333229079	4.12e-34	129
KYUSt_chr2.53421	chr6	50.704	71	26	1	1	71	161353732	161353917	4.7e-13	69.3	No
KYUSt_chr2.53421	chr7	50.704	71	26	1	1	71	178193765	178193580	6.04e-13	68.9	No
KYUSt_chr2.53421	chr5	50.704	71	26	1	1	71	225997649	225997834	6.53e-13	68.6	No
KYUSt_chr2.53422	chr2	96.931	391	11	1	391	781	333234388	333233219	0	660
KYUSt_chr2.53422	chr3	50.721	763	326	5	86	803	246470716	246472989	0	644	No
KYUSt_chr2.53422	chr5	61.224	441	140	2	397	806	27914768	27916090	2.26e-139	462	No
KYUSt_chr2.53422	chr4	42.667	75	42	1	131	205	84993619	84993840	2.85e-07	60.5	No
KYUSt_chr2.53424	chr2	98.4	125	2	0	214	338	333252595	333252221	4.34e-91	264
KYUSt_chr2.53424	chr6	69.565	23	7	0	208	230	145594599	145594667	1.7	36.6	No
KYUSt_chr2.53424	chr1	29.114	79	46	3	264	342	49667009	49667215	1.4	37	No
KYUSt_chr2.53424	scaffold_869	69.565	23	7	0	208	230	10597377	10597309	1.7	36.6	No
KYUSt_chr2.53454	chr2	100	130	0	0	104	233	333516692	333517081	2.53e-78	261
KYUSt_chr2.53454	chr6	37.879	66	38	1	63	128	197866830	197867018	0.000707	46.2	No
KYUSt_chr2.53454	chr7	42.857	42	24	0	63	104	78998672	78998547	0.089	39.7	No
KYUSt_chr2.53455	chr2	72.115	104	1	1	52	127	333519124	333519435	5.06e-36	145
KYUSt_chr2.53455	chr4	37.143	70	44	0	107	176	153861051	153860842	1.72e-05	52.8	No
KYUSt_chr2.53455	chr1	34.783	69	40	1	133	201	113330540	113330731	0.000126	50.1	No
KYUSt_chr2.53455	contig_1108	34.722	72	45	1	106	177	3330	3121	0.011	43.9	No
KYUSt_chr2.53456	chr2	100	129	0	0	1	129	333529431	333529817	1.56e-49	174
KYUSt_chr2.53456	chr4	41.667	84	47	2	46	128	328071508	328071260	2.09e-07	53.5	No
KYUSt_chr2.53456	chr6	44.578	83	45	1	46	128	86821296	86821051	2.36e-07	53.5	No
KYUSt_chr2.53456	chr1	40.476	84	49	1	46	129	148825416	148825168	4.72e-06	49.7	No
KYUSt_chr2.53465	chr2	100	210	0	0	33	242	333571934	333572563	3.79e-23	103
KYUSt_chr2.53469	chr2	100	35	0	0	40	74	333589546	333589650	1.6e-13	74.3
KYUSt_chr2.53471	chr2	100	64	0	0	1	64	333603531	333603722	1.52e-08	59.3
KYUSt_chr2.53480	chr2	100	280	0	0	1	280	333647488	333648327	5.35e-35	139
KYUSt_chr2.53480	chr1	80	20	4	0	213	232	152476087	152476146	0.006	37.4	No
KYUSt_chr2.53480	chr7	52.632	38	15	2	198	232	10894869	10894756	0.064	40.8	No
KYUSt_chr2.53481	chr2	88.571	140	13	2	1	137	333655588	333655169	6.4e-47	182
KYUSt_chr2.53481	chr1	80.488	41	8	0	501	541	152477182	152477060	7.29e-12	67	No
KYUSt_chr2.53481	chr4	58.974	39	10	1	36	74	168929286	168929384	6.11e-11	48.5	No
KYUSt_chr2.53481	chr7	62.069	29	11	0	46	74	39780945	39780859	5.99e-10	45.4	No
KYUSt_chr2.53492	chr2	99.485	194	1	0	168	361	333680865	333681446	0	409
KYUSt_chr2.53492	chr5	91.237	194	17	0	168	361	81674772	81675353	0	385	No
KYUSt_chr2.53492	chr4	90.722	194	18	0	168	361	47812058	47812639	3.02e-132	380	No
KYUSt_chr2.53492	contig_1253	29.701	468	189	8	167	495	3563564	3564964	2.45e-51	201	No
