# Supplementary material for: Identification of the genes at S and Z reveals the molecular basis and evolution of grass self-incompatibility
Source: Front Plant Sci. 2022 Oct 18;13:1011299. doi: 10.3389/fpls.2022.1011299 (PMC9623065; doi:10.3389/fpls.2022.1011299)
Supplement: Supplementary file 5 [file DataSheet_3.xlsx]

## Sheet: Cleavage_site
Supplementary dataset S3: Cleavage sites, GPI anchor prediction and subcellular localization prediction for all ZP/SP proteins identified in the study.
# SignalP-6.0	Organism: Eukarya	Timestamp: 20220619050721
# ID	Prediction	OTHER	SP(Sec/SPI)	CS	Start	End	Probability	Length	Cleaved_peptide_length
A.sativa_2A_ZP	SP	0.003171	0.996821	CS	25	26	0.5417	90	64
A.sativa_2C_ZP	SP	0.000348	0.999626	CS	29	30	0.4871	101	71
A.sativa_2D_ZP	NO_SP	0.990872	0.00916					78	78
B.distachyon_ZP	SP	0.00023	0.99976	CS	18	19	0.9774	99	80
B.mexicanum_P_ZP1	SP	0.008062	0.991927	CS	21	22	0.5107	93	71
B.mexicanum_P_ZP4	SP	0.007984	0.991964	CS	18	19	0.9572	100	81
B.mexicanum_U_ZP1	SP	0.000216	0.999736	CS	18	19	0.9813	89	70
B.mexicanum_U_ZP4	SP	0.000635	0.999337	CS	21	22	0.9623	94	72
B.sylvaticum_ZP	SP	0.000248	0.999744	CS	18	19	0.9806	100	81
E.curvula_ZP	NO_SP	0.528087	0.471914					88	88
E.tef_1_ZP	SP	0.000276	0.999705	CS	23	24	0.9763	86	62
E.tef_2_ZP	SP	0.000177	0.999824	CS	20	21	0.9692	81	60
H.bulbosum_ZP	SP	0.000223	0.999749	CS	22	23	0.9774	95	72
H.vulgare_ZP	SP	0.046049	0.953923	CS	29	30	0.7202	93	63
L.perenne_1554_ZP	SP	0.000397	0.999584	CS	26	27	0.9574	85	58
L.perenne_10672_ZP	SP	0.003152	0.996809	CS	24	25	0.9816	90	65
L.perenne_Byrne_ZP1	SP	0.000233	0.999733	CS	25	26	0.9624	84	58
L.perenne_Byrne_ZP4	SP	0.000933	0.999053	CS	25	26	0.9393	99	73
L.perenne_Kyuss_ZP1	SP	0.000236	0.999761	CS	25	26	0.9744	79	53
L.perenne_Kyuss_ZP4	SP	0.000818	0.999172	CS	28	29	0.8477	83	54
L.perrieri_ZP	SP	0.012228	0.987748	CS	29	30	0.2893	88	58
L.rigidum_ZP1	SP	0.000231	0.99974	CS	25	26	0.9328	84	58
L.rigidum_ZP4	SP	0.000198	0.999781	CS	25	26	0.9793	97	71
O.brachyantha_ZP	SP	0.000361	0.999604	CS	24	25	0.9501	81	56
O.longstaminata_ZP	SP	0.422226	0.577757	CS	28	29	0.3443	89	60
O.sativa_ZP	SP	0.036956	0.963006	CS	24	25	0.864	91	66
O.thomaeum_ZP	SP	0.0003	0.9997	CS	22	23	0.95032	82	59
P.vaginatum_ZP1	SP	0.000232	0.999762	CS	25	26	0.9762	74	48
P.vaginatum_ZP4	NO_SP	0.581624	0.418362					75	75
P.virgatum_ZP1	SP	0.000197	0.999776	CS	20	21	0.9771	83	62
P.virgatum_ZP4	SP	0.000284	0.999687	CS	24	25	0.6635	92	67
S.bicolor_ZP	SP	0.000901	0.999082	CS	26	27	0.9637	78	51
S.cereale_Lo7_ZP1	SP	0.000246	0.999732	CS	24	25	0.9678	87	62
S.cereale_Lo7_ZP4	SP	0.003034	0.996937	CS	21	22	0.9331	92	70
S._cereale_Weining_ZP	NO_SP	0.528952	0.471044					104	104
S.italica_ZP	SP	0.02116	0.978804	CS	24	25	0.6915	87	62
T.aestivum_A_ZP	SP	0.138414	0.861561	CS	25	26	0.6381	90	64
T.aestivum_B_ZP1	SP	0.000263	0.999704	CS	25	26	0.9745	80	54
T.aestivum_B_ZP4	SP	0.000373	0.999589	CS	25	26	0.8963	114	88
T.aestivum_D_ZP	SP	0.000209	0.999757	CS	25	26	0.9578	87	61
T.intermedium_ZP1	SP	0.000207	0.999757	CS	24	25	0.9759	87	62
T.intermedium_ZP4	SP	0.00033	0.999621	CS	25	26	0.7826	89	63
A.sativa_1D_SP	SP	0.000232	0.999738	CS	22	23	0.979	91	68
A.sativa_3D_SP	SP	0.000291	0.99968	CS	24	25	0.511	88	63
A.sativa_7A_SP	SP	0.000861	0.999104	CS	18	19	0.6495	85	66
B.distachyon_SP	SP	0.000442	0.999539	CS	23	24	0.969	85	61
B.sylvaticum_SP	SP	0.000277	0.999714	CS	20	21	0.9785	86	65
E.curvula_SP	SP	0.000202	0.999776	CS	24	25	0.6632	76	51
E.tef_1_SP	SP	0.000462	0.999505	CS	23	24	0.9617	74	50
E.tef_2_SP	SP	0.000302	0.999649	CS	23	24	0.9635	84	60
L.perenne_303_SP	SP	0.000316	0.999634	CS	22	23	0.7812	87	64
L.perenne_1841_SP	SP	0.000497	0.999488	CS	25	26	0.9636	95	69
L.perenne_Byrne_SP	SP	0.000439	0.999531	CS	26	27	0.9783	89	62
L.perenne_Kyuss_SP	SP	0.000208	0.999785	CS	21	22	0.9774	83	61
L.perenne_Velmurugan_SP	SP	0.000257	0.999731	CS	21	22	0.9801	86	64
L.perrieri_SP	SP	0.000215	0.999764	CS	27	28	0.9519	92	64
L.rigidum_SP	SP	0.000335	0.999624	CS	28	29	0.9731	90	61
O.brachyantha_SP	SP	0.000215	0.999757	CS	26	27	0.9684	70	43
O.longstaminata_SP	SP	0.000703	0.999268	CS	27	28	0.2881	92	64
O.sativa_SP	SP	0.000228	0.999778	CS	24	25	0.8913	98	73
P.vaginatum_SP	SP	0.000235	0.999734	CS	24	25	0.8907	90	65
P.virgatum_SP	SP	0.3422	0.657772	CS	26	27	0.4949	88	61
S.bicolor_SP	NO_SP	0.558828	0.44117					95	95
S.cereale_Lo7_SP	SP	0.000202	0.999767	CS	22	23	0.9802	85	62
S.cereale_Weining_SP	SP	0.000241	0.999752	CS	23	24	0.9747	90	66
T.aestivum_A_SP	SP	0.000244	0.999706	CS	22	23	0.9857	91	68
T.aestivum_B_SP	SP	0.000365	0.999601	CS	22	23	0.9706	86	63
T.aestivum_D_SP	SP	0.000488	0.999455	CS	22	23	0.9577	84	61
T.intermedium_SP	SP	0.000301	0.99967	CS	22	23	0.8807	73	50

## Sheet: GPI_anchor
# NetGPI 1.1	Timestamp: 20220620010410
# ID	Seq-length	Pred. GPI-Anchored	Omega-site pos.	Likelihood	Amino-acid
B.sylvaticum_ZP	100	Not GPI-Anchored	-	0.994	*
T.aestivum_B_ZP4	114	Not GPI-Anchored	-	0.991	*
S._cereale_Weining_ZP	104	Not GPI-Anchored	-	0.991	*
B.mexicanum_P_ZP4	100	Not GPI-Anchored	-	0.993	*
B.distachyon_ZP	99	Not GPI-Anchored	-	0.994	*
L.perenne_Byrne_ZP4	99	Not GPI-Anchored	-	0.992	*
A.sativa_2C_ZP	98	Not GPI-Anchored	-	0.991	*
O.sativa_SP	98	Not GPI-Anchored	-	0.994	*
L.rigidum_ZP4	97	Not GPI-Anchored	-	0.991	*
S.bicolor_SP	95	Not GPI-Anchored	-	0.992	*
L.perenne_1841_SP	95	Not GPI-Anchored	-	0.994	*
H.bulbosum_ZP	95	Not GPI-Anchored	-	0.992	*
B.mexicanum_U_ZP4	94	Not GPI-Anchored	-	0.995	*
B.mexicanum_P_ZP1	93	Not GPI-Anchored	-	0.994	*
H.vulgare_ZP	93	Not GPI-Anchored	-	0.989	*
L.perrieri_SP	92	Not GPI-Anchored	-	0.994	*
O.longstaminata_SP	92	Not GPI-Anchored	-	0.994	*
P.virgatum_ZP4	92	Not GPI-Anchored	-	0.992	*
S.cereale_Lo7_ZP4	92	Not GPI-Anchored	-	0.989	*
T.aestivum_A_SP	91	Not GPI-Anchored	-	0.994	*
O.sativa_ZP	91	Not GPI-Anchored	-	0.993	*
A.sativa_1D_SP	91	Not GPI-Anchored	-	0.994	*
S.cereale_Weining_SP	90	Not GPI-Anchored	-	0.994	*
L.rigidum_SP	90	Not GPI-Anchored	-	0.995	*
T.aestivum_A_ZP	90	Not GPI-Anchored	-	0.992	*
L.perenne_10672_ZP	90	Not GPI-Anchored	-	0.994	*
A.sativa_2A_ZP	90	Not GPI-Anchored	-	0.991	*
P.vaginatum_SP	90	Not GPI-Anchored	-	0.992	*
O.longstaminata_ZP	89	Not GPI-Anchored	-	0.992	*
L.perenne_Byrne_SP	89	Not GPI-Anchored	-	0.995	*
B.mexicanum_U_ZP1	89	Not GPI-Anchored	-	0.992	*
T.intermedium_ZP4	89	Not GPI-Anchored	-	0.992	*
L.perrieri_ZP	88	Not GPI-Anchored	-	0.991	*
A.sativa_3D_SP	88	Not GPI-Anchored	-	0.995	*
E.curvula_ZP	88	Not GPI-Anchored	-	0.991	*
P.virgatum_SP	88	Not GPI-Anchored	-	0.989	*
S.italica_ZP	87	Not GPI-Anchored	-	0.992	*
T.intermedium_ZP1	87	Not GPI-Anchored	-	0.993	*
L.perenne_303_SP	87	Not GPI-Anchored	-	0.994	*
S.cereale_Lo7_ZP1	87	Not GPI-Anchored	-	0.993	*
T.aestivum_D_ZP	87	Not GPI-Anchored	-	0.993	*
B.sylvaticum_SP	86	Not GPI-Anchored	-	0.994	*
L.perenne_Velmurugan_SP	86	Not GPI-Anchored	-	0.995	*
E.tef_1_ZP	86	Not GPI-Anchored	-	0.991	*
T.aestivum_B_SP	86	Not GPI-Anchored	-	0.995	*
B.distachyon_SP	85	Not GPI-Anchored	-	0.993	*
A.sativa_7A_SP	85	Not GPI-Anchored	-	0.993	*
S.cereale_Lo7_SP	85	Not GPI-Anchored	-	0.995	*
L.perenne_1554_ZP	85	Not GPI-Anchored	-	0.994	*
L.rigidum_ZP1	84	Not GPI-Anchored	-	0.991	*
E.tef_2_SP	84	Not GPI-Anchored	-	0.994	*
T.aestivum_D_SP	84	Not GPI-Anchored	-	0.994	*
L.perenne_Byrne_ZP1	84	Not GPI-Anchored	-	0.99	*
L.perenne_Kyuss_ZP4	83	Not GPI-Anchored	-	0.991	*
L.perenne_Kyuss_SP	83	Not GPI-Anchored	-	0.994	*
P.virgatum_ZP1	83	Not GPI-Anchored	-	0.989	*
E.tef_2_ZP	81	Not GPI-Anchored	-	0.996	*
O.brachyantha_ZP	81	Not GPI-Anchored	-	0.992	*
T.aestivum_B_ZP1	80	Not GPI-Anchored	-	0.992	*
L.perenne_Kyuss_ZP1	79	Not GPI-Anchored	-	0.989	*
S.bicolor_ZP	78	Not GPI-Anchored	-	0.996	*
E.curvula_SP	76	Not GPI-Anchored	-	0.992	*
A.sativa_2D_ZP	76	Not GPI-Anchored	-	0.994	*
P.vaginatum_ZP4	75	Not GPI-Anchored	-	0.992	*
P.vaginatum_ZP1	74	Not GPI-Anchored	-	0.989	*
E.tef_1_SP	74	Not GPI-Anchored	-	0.992	*
T.intermedium_SP	73	Not GPI-Anchored	-	0.995	*
O.thomaeum_ZP	70	Not GPI-Anchored	-	0.995	*
O.brachyantha_SP	70	Not GPI-Anchored	-	0.995	*

## Sheet: DeepLoc
Protein_ID	Localizations	Signals	Cytoplasm	Nucleus	Extracellular	Cell membrane	Mitochondrion	Plastid	Endoplasmic reticulum	Lysosome/Vacuole	Golgi apparatus	Peroxisome
A.sativa_2A_ZP	Extracellular|Plastid	Signal peptide	0.0305	0.0592	0.7629	0.2599	0.0216	0.674	0.1097	0.1613	0.089	0.0243
A.sativa_2C_ZP	Extracellular|Endoplasmic reticulum	Signal peptide	0.0504	0.0601	0.7135	0.3859	0.0104	0.177	0.615	0.2548	0.2729	0.0065
A.sativa_2D_ZP	Cytoplasm		0.7001	0.4516	0.272	0.0858	0.3663	0.0268	0.0681	0.0456	0.074	0.021
B.distachyon_ZP	Extracellular|Endoplasmic reticulum	Signal peptide	0.0495	0.0715	0.7141	0.2994	0.0148	0.4866	0.6345	0.3765	0.1572	0.0687
B.mexicanum_P_ZP1	Extracellular	Signal peptide	0.058	0.0531	0.8278	0.2766	0.0121	0.1479	0.2758	0.231	0.182	0.0268
B.mexicanum_P_ZP4	Cytoplasm		0.2907	0.2653	0.2147	0.1855	0.2056	0.023	0.2674	0.2229	0.1005	0.0116
B.mexicanum_U_ZP1	Extracellular	Signal peptide	0.0512	0.042	0.7228	0.2752	0.0361	0.3808	0.317	0.4068	0.1258	0.0239
B.mexicanum_U_ZP4	Extracellular	Signal peptide	0.0446	0.0533	0.9286	0.1514	0.0298	0.2711	0.2355	0.4259	0.2054	0.0254
B.sylvaticum_ZP	Endoplasmic reticulum	Signal peptide	0.0372	0.0565	0.5738	0.2089	0.0171	0.4506	0.5873	0.5018	0.1461	0.0405
E.curvula_ZP	Extracellular	Signal peptide	0.0359	0.0578	0.7815	0.2555	0.0113	0.4166	0.1745	0.1406	0.0865	0.0177
E.tef_1_ZP	Extracellular	Signal peptide	0.0603	0.0676	0.7065	0.2821	0.0104	0.4068	0.2395	0.1383	0.1375	0.0199
E.tef_2_ZP	Extracellular	Signal peptide	0.167	0.1201	0.6937	0.1058	0.2444	0.0928	0.0736	0.047	0.1187	0.024
H.bulbosum_ZP	Extracellular	Signal peptide	0.0497	0.0414	0.8972	0.2972	0.0208	0.4597	0.1825	0.2403	0.1383	0.0115
H.vulgare_ZP	Extracellular	Signal peptide	0.0416	0.0521	0.6464	0.2658	0.0112	0.489	0.2936	0.3835	0.2579	0.0144
L.perenne_1554_ZP	Extracellular	Signal peptide	0.0409	0.0982	0.7297	0.3414	0.0164	0.4539	0.156	0.1441	0.1519	0.0119
L.perenne_10672_ZP	Extracellular	Signal peptide	0.0412	0.0705	0.7997	0.2434	0.0164	0.5806	0.2421	0.2231	0.1527	0.0249
L.perenne_Byrne_ZP1	Extracellular	Signal peptide	0.1648	0.1501	0.8042	0.0762	0.1631	0.026	0.1885	0.1043	0.278	0.0559
L.perenne_Byrne_ZP4	Extracellular	Signal peptide	0.0591	0.0354	0.8714	0.2909	0.0165	0.2664	0.2972	0.3029	0.2352	0.0123
L.perenne_Kyuss_ZP1	Extracellular	Signal peptide	0.2578	0.1689	0.894	0.1129	0.1102	0.0322	0.2541	0.1733	0.216	0.0219
L.perenne_Kyuss_ZP4	Extracellular	Signal peptide	0.0428	0.0405	0.7434	0.2029	0.0156	0.5579	0.3628	0.3235	0.263	0.0688
L.perrieri_ZP	Extracellular	Signal peptide	0.0299	0.0491	0.8123	0.245	0.0173	0.4022	0.1575	0.2203	0.1326	0.062
L.rigidum_ZP1	Extracellular	Signal peptide	0.2174	0.1249	0.5925	0.1098	0.1194	0.0568	0.299	0.2078	0.3042	0.0556
L.rigidum_ZP4	Extracellular	Signal peptide	0.0781	0.0518	0.7704	0.2647	0.0109	0.1781	0.3782	0.4427	0.2386	0.0042
O.brachyantha_ZP	Extracellular	Signal peptide	0.0376	0.0641	0.8796	0.1704	0.0141	0.3057	0.1356	0.1105	0.0891	0.0261
O.longstaminata_ZP	Extracellular	Signal peptide	0.2476	0.2973	0.6607	0.0608	0.5477	0.1392	0.4923	0.5106	0.4655	0.0215
O.sativa_ZP	Extracellular	Signal peptide	0.0688	0.1198	0.8062	0.2153	0.0176	0.3515	0.2904	0.3517	0.1977	0.0088
O.thomaeum_ZP	Extracellular	Signal peptide	0.0816	0.0245	0.9688	0.1273	0.0462	0.0128	0.0844	0.1904	0.1839	0.0045
P.vaginatum_ZP1	Extracellular	Signal peptide	0.0311	0.1	0.7937	0.1678	0.005	0.3795	0.2533	0.154	0.0684	0.0227
P.vaginatum_ZP4	Plastid	Signal peptide	0.069	0.0513	0.5961	0.1185	0.0338	0.6001	0.1405	0.1513	0.074	0.0928
P.virgatum_ZP1	Extracellular	Signal peptide	0.0438	0.0503	0.9034	0.3128	0.024	0.3379	0.2412	0.3209	0.2132	0.0493
P.virgatum_ZP4	Extracellular	Signal peptide	0.0447	0.0593	0.8058	0.3481	0.0097	0.22	0.243	0.413	0.2207	0.0065
S.bicolor_ZP	Extracellular	Signal peptide	0.0445	0.0501	0.8519	0.1933	0.0045	0.1677	0.2643	0.1533	0.1427	0.0294
S.cereale_Lo7_ZP1	Extracellular	Signal peptide	0.0289	0.105	0.8119	0.4007	0.0101	0.2615	0.2483	0.1173	0.1196	0.0144
S.cereale_Lo7_ZP4	Extracellular	Signal peptide	0.0842	0.0413	0.9366	0.2902	0.0286	0.1528	0.1792	0.3538	0.2076	0.0193
S._cereale_Weining_ZP	Extracellular	Signal peptide	0.205	0.0477	0.6242	0.1367	0.0822	0.0533	0.3582	0.221	0.301	0.0052
S.italica_ZP	Extracellular	Signal peptide	0.0344	0.0504	0.8191	0.2053	0.0096	0.3667	0.1443	0.1329	0.0826	0.0103
T.aestivum_A_ZP	Extracellular	Signal peptide	0.1152	0.1033	0.8534	0.1925	0.0187	0.4327	0.2099	0.3026	0.0974	0.0244
T.aestivum_B_ZP1	Extracellular	Signal peptide	0.0439	0.0938	0.7838	0.3248	0.0163	0.4087	0.2558	0.0911	0.0834	0.0184
T.aestivum_B_ZP4	Extracellular	Signal peptide	0.0639	0.0607	0.8107	0.241	0.0168	0.4007	0.4422	0.5005	0.349	0.0185
T.aestivum_D_ZP	Extracellular	Signal peptide	0.038	0.094	0.7249	0.4443	0.0066	0.1775	0.2873	0.2007	0.1642	0.0163
T.intermedium_ZP1	Extracellular	Signal peptide	0.0365	0.1233	0.6898	0.3583	0.0089	0.1426	0.3091	0.1358	0.0932	0.0083
T.intermedium_ZP4	Extracellular	Signal peptide	0.0388	0.0779	0.7714	0.2983	0.0181	0.4485	0.132	0.1705	0.104	0.0339
A.sativa_1D_SP	Extracellular	Signal peptide	0.038	0.0637	0.6743	0.2357	0.0097	0.4639	0.2835	0.4621	0.0996	0.0313
A.sativa_3D_SP	Extracellular	Signal peptide	0.0315	0.0644	0.7551	0.1677	0.0103	0.3899	0.2641	0.4553	0.115	0.0067
A.sativa_7A_SP	Extracellular	Signal peptide	0.0569	0.0532	0.8469	0.1286	0.015	0.2331	0.3057	0.4065	0.1192	0.0161
B.distachyon_SP	Extracellular	Signal peptide	0.0769	0.064	0.9103	0.1675	0.1331	0.2538	0.087	0.2344	0.1009	0.0216
B.sylvaticum_SP	Extracellular	Signal peptide	0.0459	0.0405	0.8973	0.1591	0.0156	0.4019	0.1792	0.4979	0.0994	0.007
E.curvula_SP	Extracellular	Signal peptide	0.0634	0.0578	0.9572	0.2244	0.0118	0.22	0.2195	0.3297	0.1274	0.0649
E.tef_1_SP	Extracellular	Signal peptide	0.0432	0.0685	0.8699	0.2703	0.0091	0.2315	0.2241	0.2662	0.1564	0.0148
E.tef_2_SP	Extracellular	Signal peptide	0.0472	0.0852	0.9263	0.2709	0.0093	0.3172	0.1286	0.2032	0.0975	0.0235
L.perenne_303_SP	Extracellular	Signal peptide	0.0407	0.0472	0.786	0.2506	0.0097	0.5657	0.1438	0.4206	0.1032	0.0138
L.perenne_1841_SP	Extracellular	Signal peptide	0.0323	0.0614	0.7816	0.3776	0.009	0.4328	0.2259	0.2618	0.1329	0.0142
L.perenne_Byrne_SP	Extracellular|Lysosome/Vacuole	Signal peptide	0.0966	0.0781	0.9105	0.1496	0.0859	0.2057	0.4943	0.6404	0.3432	0.0367
L.perenne_Kyuss_SP	Extracellular	Signal peptide	0.0361	0.0597	0.825	0.1604	0.0055	0.3017	0.2712	0.3917	0.1788	0.0102
L.perenne_Velmurugan_SP	Extracellular	Signal peptide	0.0284	0.0571	0.7994	0.2257	0.0153	0.5462	0.1218	0.2617	0.0531	0.0206
L.perrieri_SP	Extracellular	Signal peptide	0.0324	0.0573	0.8444	0.1568	0.0141	0.282	0.1365	0.185	0.1259	0.0741
L.rigidum_SP	Extracellular	Signal peptide	0.0451	0.0772	0.9166	0.1875	0.0224	0.4756	0.6073	0.5562	0.2596	0.0161
O.brachyantha_SP	Extracellular	Signal peptide	0.0442	0.0584	0.9592	0.1279	0.0076	0.1494	0.1971	0.2518	0.1262	0.1304
O.longstaminata_SP	Extracellular	Signal peptide	0.0373	0.0817	0.7753	0.1808	0.0258	0.3199	0.2261	0.2961	0.1556	0.1262
O.sativa_SP	Extracellular	Signal peptide	0.0495	0.0542	0.8716	0.2212	0.0058	0.1949	0.2357	0.3473	0.2126	0.0447
P.vaginatum_SP	Extracellular	Signal peptide	0.0312	0.0803	0.9437	0.1921	0.0111	0.1731	0.223	0.2375	0.1395	0.011
P.virgatum_SP	Extracellular	Signal peptide	0.0985	0.089	0.5052	0.1486	0.0618	0.3847	0.4915	0.194	0.0697	0.0256
S.bicolor_SP	Extracellular	Signal peptide	0.0403	0.0964	0.7797	0.2297	0.0094	0.4608	0.1519	0.2963	0.1955	0.0376
S.cereale_Lo7_SP	Extracellular	Signal peptide	0.0488	0.0733	0.8671	0.1706	0.0061	0.15	0.2636	0.3888	0.1641	0.0197
S.cereale_Weining_SP	Extracellular	Signal peptide	0.035	0.0686	0.7228	0.3226	0.0073	0.545	0.2533	0.3422	0.1117	0.007
T.aestivum_A_SP	Extracellular	Signal peptide	0.0389	0.0733	0.764	0.2569	0.0083	0.4125	0.2753	0.3412	0.1313	0.0106
T.aestivum_B_SP	Extracellular	Signal peptide	0.0431	0.0697	0.6828	0.1777	0.0074	0.3604	0.2137	0.4188	0.3175	0.0151
T.aestivum_D_SP	Extracellular	Signal peptide	0.041	0.0997	0.7664	0.2777	0.011	0.4055	0.2587	0.2625	0.1426	0.0187
T.intermedium_SP	Extracellular	Signal peptide	0.0463	0.0879	0.89	0.1103	0.034	0.5861	0.2187	0.266	0.136	0.1745
