# Supplementary material for: Identification of the genes at S and Z reveals the molecular basis and evolution of grass self-incompatibility
Source: Front Plant Sci. 2022 Oct 18;13:1011299. doi: 10.3389/fpls.2022.1011299 (PMC9623065; doi:10.3389/fpls.2022.1011299)
Supplement: Supplementary file 6 [file DataSheet_4.xlsx]

## Sheet: Sheet1
Supplementary dataset S4: Detailed information of genomic sequences containing S and Z loci used to generate Figures 3 and 4.
	S-locus size (kb between flanking genes)	Z-locus size (kb between flanking genes)	Source	Version	Reference
A.sativa_2A	485	136	https://wheat.pw.usda.gov/	PepsiCo OT3098 v2 Hexaploid Oat (2021)	Avena sativa – OT3098 v2, PepsiCo, https://wheat.pw.usda.gov/jb?data=/ggds/oat-ot3098v2-pepsico
A.sativa_2C	533	42	https://wheat.pw.usda.gov/	PepsiCo OT3098 v2 Hexaploid Oat (2021)	Avena sativa – OT3098 v2, PepsiCo, https://wheat.pw.usda.gov/jb?data=/ggds/oat-ot3098v2-pepsico
A.sativa_2D	257	114	https://wheat.pw.usda.gov/	PepsiCo OT3098 v2 Hexaploid Oat (2021)	Avena sativa – OT3098 v2, PepsiCo, https://wheat.pw.usda.gov/jb?data=/ggds/oat-ot3098v2-pepsico
B.distachyon	32	29	https://phytozome-next.jgi.doe.gov/	Brachypodium distachyon v3.1
B.mexicanum_9P		63	https://phytozome-next.jgi.doe.gov/	Brachypodium mexicanum v1.1	These sequence data were produced by the US Department of Energy Joint Genome Institute
B.mexicanum_9U	51	65	https://phytozome-next.jgi.doe.gov/	Brachypodium mexicanum v1.1	These sequence data were produced by the US Department of Energy Joint Genome Institute
B.sylvaticum	34	21	https://phytozome-next.jgi.doe.gov/	Brachypodium sylvaticum v1.1	These sequence data were produced by the US Department of Energy Joint Genome Institute
E.curvula	66	23	http://plants.ensembl.org/index.html	CERZOS_E.curvula1.0	A high-quality genome of Eragrostis curvula grass provides insights into Poaceae evolution and supports new strategies to enhance forage quality
E.tef_1	63	24	http://plants.ensembl.org/index.html	ASM97063v1	Genome and transcriptome sequencing identifies breeding targets in the orphan crop tef (Eragrostis tef)
E.tef_2	71	25	http://plants.ensembl.org/index.html	ASM97063v1	Genome and transcriptome sequencing identifies breeding targets in the orphan crop tef (Eragrostis tef)
H.bulbosum			https://www.ncbi.nlm.nih.gov/assembly/GCA_900070015.1	Hordeum_bulbosum_assembly1
H.vulgare	50	325	https://wheat.pw.usda.gov/	Barley cv. MorexV3 (2021)	Long-read sequence assembly: a technical evaluation in barley
L.perenne_Kyuss	695	83			Frei et al (2021)
L.perenne_Byrne					Byrne et al (2015)
L.perenne_Velmurugan					Velmurugan et al (2016)
L.perrieri	70	59	http://plants.ensembl.org/index.html	Lperr_V1.4	Genomes of 13 domesticated and wild rice relatives highlight genetic conservation, turnover and innovation across the genus Oryza
L.rigidum	500	73	https://www.ncbi.nlm.nih.gov/genome/?term=txid89674[Organism:noexp]	APGP_CSIRO_Lrig_0.1
O.brachyantha	94	29	http://plants.ensembl.org/index.html	Oryza_brachyantha.v1.4b	Genomes of 13 domesticated and wild rice relatives highlight genetic conservation, turnover and innovation across the genus Oryza
O.longistaminata	71	32	http://plants.ensembl.org/index.html	O_longistaminata_v1.0	Genomes of 13 domesticated and wild rice relatives highlight genetic conservation, turnover and innovation across the genus Oryza
O.sativa	99	29	http://rice.uga.edu/index.shtml	RGAP 7	Improvement of the Oryza sativa Nipponbare reference genome using next generation sequence and optical map data
O.thomaeum	80	16	https://phytozome-next.jgi.doe.gov/	Oropetium thomaeum v1.0	Single-molecule sequencing of the desiccation-tolerant grass Oropetium thomaeum
P.vaginatum	175	45	https://phytozome-next.jgi.doe.gov/	Paspalum vaginatum v3.1	These sequence data were made available by the Department of Energy's Joint Genome Institute
P.virgatum	3632	23	https://phytozome-next.jgi.doe.gov/	Panicum virgatum v5.1	Genomic mechanisms of climate adaptation in polyploid bioenergy switchgrass.
S.bicolor	1440	29	https://phytozome-next.jgi.doe.gov/	Sorghum bicolor v3.1.1	The Sorghum bicolor reference genome: improved assembly, gene annotations, a transcriptome atlas, and signatures of genome organization.
S.cereale_Lo7	509	574	https://wheat.pw.usda.gov/	Secale cereale Lo7 (rye) v1	Chromosome-scale genome assembly provides insights into rye biology, evolution and agronomic potential
S.cereale_Weining	752	710	https://wheat.pw.usda.gov/	Rye Weining v1, Secale cereale (Mar 2021)	A high-quality genome assembly highlights rye genomic characteristics and agronomically important genes
S.italica		26	https://phytozome-next.jgi.doe.gov/	Setaria italica v2.2	Reference genome sequence of the model plant Setaria
T.aestivum_D	752	299	https://wheat.pw.usda.gov/	Wheat Chinese Spring IWGSC RefSeq v2.1 genome assembly (2021)	Optical maps refine the bread wheat Triticum aestivum cv. Chinese Spring genome assembly
T.aestivum_A	524	323	https://wheat.pw.usda.gov/	Wheat Chinese Spring IWGSC RefSeq v2.1 genome assembly (2021)	Optical maps refine the bread wheat Triticum aestivum cv. Chinese Spring genome assembly
T.aestivum_B	728	430	https://wheat.pw.usda.gov/	Wheat Chinese Spring IWGSC RefSeq v2.1 genome assembly (2021)	Optical maps refine the bread wheat Triticum aestivum cv. Chinese Spring genome assembly
T.intermedium	540	144	https://phytozome-next.jgi.doe.gov/	Thinopyrum intermedium v2.1	These sequence data were produced by the US Department of Energy Joint Genome Institute
